# Supplementary material for: Highly efficient base editing in Staphylococcus aureus using an engineered CRISPR RNA-guided cytidine deaminase
Source: PubMed Central journal article supplement — Chem Sci. 2018 Feb 22;9(12):3248–53. doi: 10.1039/c8sc00637g (PMC5932532; doi:10.1039/c8sc00637g), 2018-02-22
Supplement: SC-009-C8SC00637G-s001.pdf [file SC-009-C8SC00637G-s001.pdf]

Electronic Supplementary Material (ESI) for Chemical Science

## **Highly Efficient Base Editing in *Staphylococcus aureus* Using an Engineered CRISPR RNA-guided Cytidine Deaminase**

Tongnian Gu<sup>‡a</sup>, Siqi Zhao<sup>‡b,c</sup>, Yishuang Pi<sup>a</sup>, Weizhong Chen<sup>a</sup>, Chuanyuan Chen<sup>b,c</sup>, Qian Liu<sup>d</sup>, Min Li<sup>d</sup>, Dali Han<sup>\*b,c</sup>, and Quanjiang Ji<sup>\*a</sup>

<sup>a</sup>School of Physical Science and Technology, ShanghaiTech University, Shanghai 201210, China.

<sup>b</sup>Key Laboratory of Genomic and Precision Medicine, Beijing Institute of Genomics, Chinese Academy of Sciences, Beijing 100101, China.

<sup>c</sup>College of Future Technology, Sino-Danish College, University of Chinese Academy of Science, Beijing 100049, China.

<sup>d</sup>Department of Laboratory Medicine, Ren Ji Hospital, School of Medicine, Shanghai Jiao Tong University, Shanghai 200127, China.

<sup>‡</sup>These authors contributed equally to the work.

## Detailed protocol for base editing in *S. aureus*

All the base-editing plasmids (pnCasSA-BEC-NNN) were constructed by using the following protocol:

### (1). Oligo design

Select a 20 bp-spacer sequence before a PAM site (NGG) in the target locus. Design two oligos in the following form:

Oligo F: 5' -**GAAA**NNNNNNNNNNNNNNNNNNNNNN-3'  
Oligo R: 3' -NNNNNNNNNNNNNNNNNNNNNN**CAA**-5'

### (2). Phosphorylation of the oligos

| Sample                          | Volume |
|---------------------------------|--------|
| T4 DNA ligase buffer (10x, NEB) | 5 µL   |
| Oligo F (100 µM)                | 1 µL   |
| Oligo R (100 µM)                | 1 µL   |
| T4 polynucleotide kinase (NEB)  | 1 µL   |
| ddH <sub>2</sub> O              | 42 µL  |
| Total                           | 50 µL  |

Incubate at 37 °C for 1 hour.

### (3). Annealing of the phosphorylated product

Mix 0.5 µL of 5 M NaCl with the phosphorylated product. Anneal the two oligos by incubating them at 95 °C for 3 min and then slowly cooling them down to room temperature using a thermocycler. Dilute the annealed product 10 times using ddH<sub>2</sub>O.

### (4). Golden gate assembly

| Sample                               | Volume |
|--------------------------------------|--------|
| T4 DNA ligase buffer (10x, NEB)      | 1 µL   |
| The pnCasSA-BEC plasmid (20 fmol/µL) | 1 µL   |
| Annealed spacer (20 fmol/µL)         | 1 µL   |
| T4 DNA ligase (NEB)                  | 0.5 µL |
| BsaI-HF (NEB)                        | 0.5 µL |
| ddH <sub>2</sub> O                   | 6 µL   |
| Total                                | 10 µL  |

Reaction protocol:

| T(°C) | Time    |
|-------|---------|
| 37 °C | 3 min   |
| 16 °C | 4 min   |
| 50 °C | 5 min   |
| 80 °C | 15 min  |
| 10 °C | forever |

Run the reaction inside a thermocycler using the above protocol.

#### (5). Transformation

The product from the Golden Gate assembly reaction was transformed into 100  $\mu$ L *E.coli* DH5 $\alpha$  competent cells. The plate was incubated at 37 °C overnight. The successful construction of the pnCAsSA-BEC-NNN plasmid was verified by both PCR and sequencing.

#### (6). Base editing in the RN4220 strain

The pnCAsSA-BEC-NNN plasmid was transformed into the RN4220 competent cells by electroporation. 1/10 cells were plated onto a TSB plate containing 5  $\mu$ g/mL chloramphenicol. The plate was incubated at 30 °C for 24 h. The genomic DNAs of the colonies were extracted using Ezup columns following the bacterial genomic DNA purification protocol (Sangon Biotech, Shanghai, China). Approximate 1000-bp DNA sequence covering the target site was amplified by PCR. The successful mutation in the target site was confirmed by sequencing.

#### (7). Base editing in other *S. aureus* strains

The pnCAsSA-BEC-NNN plasmid isolated from the RN4220 strain containing the desired mutation was transformed into a target *S. aureus* strain by electroporation. All the 1 mL cells after recovery were plated onto a TSB plate containing 10  $\mu$ g/mL chloramphenicol. The plate was incubated at 30 °C for 24 h. The genomic DNAs of the colonies were extracted using Ezup columns following the bacterial genomic DNA purification protocol (Sangon Biotech, Shanghai, China). Approximate 1000-bp DNA sequence covering the target site was amplified by PCR. The successful mutation in the target site was confirmed by sequencing.

#### (8). Plasmid curing

The cells containing the desired mutation were cultured in TSB containing 10  $\mu$ g/mL chloramphenicol. They were incubated at 30 °C overnight. Next day, the cells were 1:1000 diluted and incubated at 42 °C for 12 h without adding chloramphenicol. The bacteria were plated onto a TSB plate in the absence of chloramphenicol. The plate was incubated at 37 °C overnight. Next day, several colonies were randomly picked and resuspended individually into 10  $\mu$ L ddH<sub>2</sub>O. The cells were streaked onto two different TSB plates in the presence or absence of 5  $\mu$ g/mL chloramphenicol. The successful curing of the plasmid was confirmed when the cells could only grow on the plate without chloramphenicol.

**Figure S1.** The pnCasSA-BEC system enables highly efficient base editing in the spacer sequence of *esaD* in the RN4220 strain. The mutation efficiency was 100%. The PAM site is colored blue. The spacer is colored black. The mutation site is colored red. A representative sequencing chromatography for the mutation is shown.

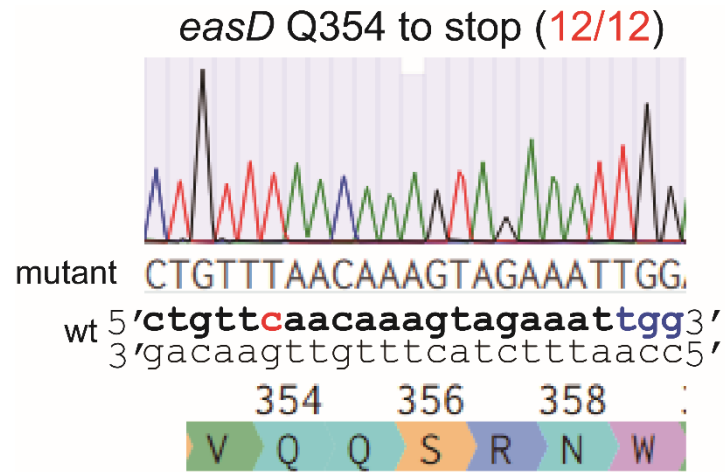

**Figure S2.** Examination of the editable window of the pCasSA-BEC system in *S. aureus*. The editable Cs are indicated. A representative sequencing chromatogram for the target locus of each colony after the transformation of the pCasSA-BEC plasmid is shown.

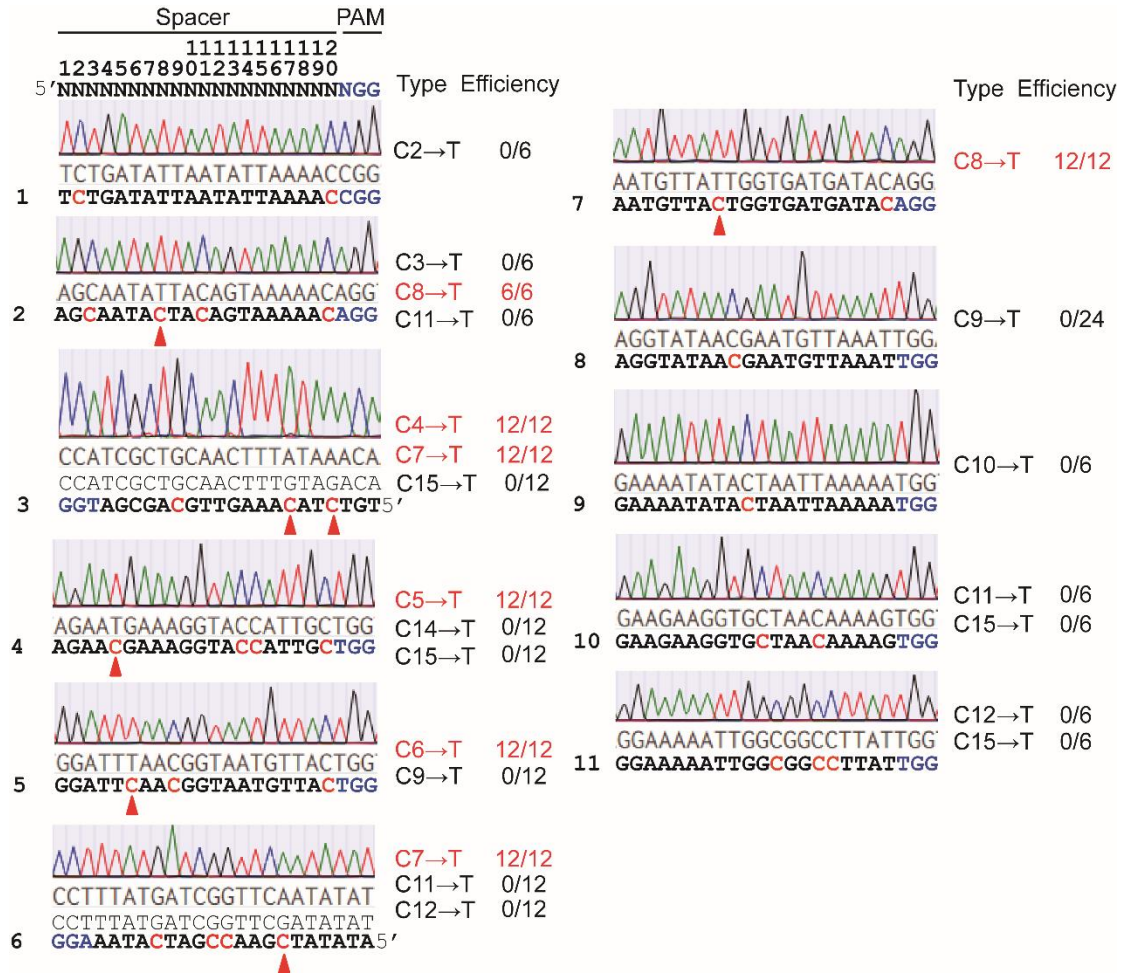

**Figure S3.** Assessment of the capacity of the pnCAsSA-BEC system in editing two successive Cs in the editable window. The editable Cs are indicated. A representative sequencing chromatogram for the target loci that underwent the conversion of C(s) is shown.

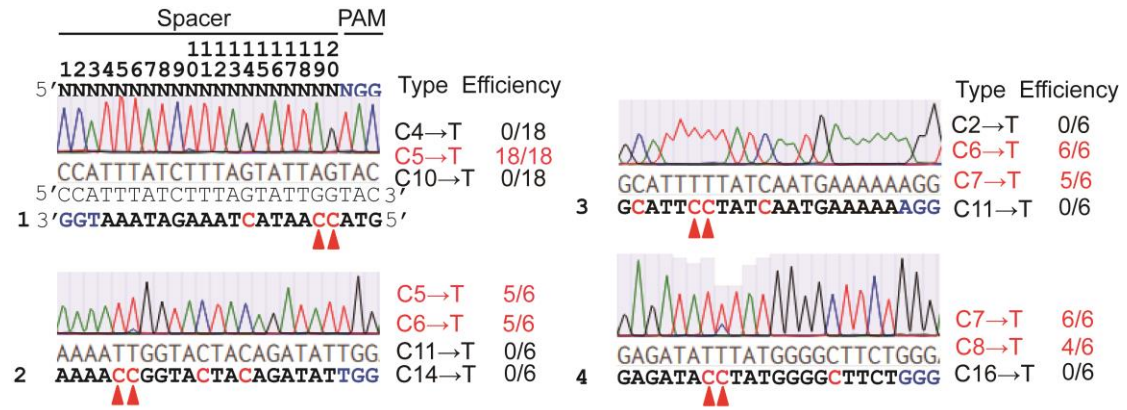

**Figure S4.** The pnCAsSA-BEC plasmid can be easily cured after editing. (A) After culturing the cells at 42 °C, the pnCAsSA-BEC-*agrAsp* plasmid was cured in the RN4220 strain. Cm: chloramphenicol. (B) After culturing the cells at 42 °C, the pnCAsSA-BEC-*cntAsp* plasmid was cured in the RN4220 strain. Cm: chloramphenicol.

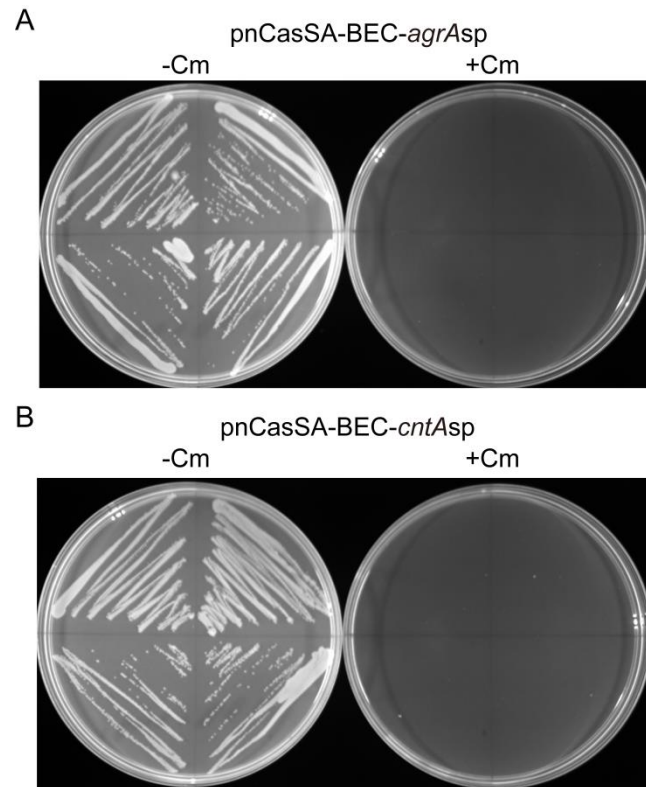

**Figure S5.** Introduction of spacers into the pCasSA-BEC plasmid did not reduce transformation CFU whereas introduction of both the spacer and the repair arm into the pCasSA plasmid drastically reduced transformation CFU. (A) The transformation CFUs of various plasmids in the RN4220 strain. 1/10 cells transformed with the empty pCasSA, the empty pCasSA-BEC, and the pCasSA-BEC-*agrAsp* plasmids were plated individually onto the plates whereas all the cells transformed with the pCasSA-*agrA* plasmid were plated onto the plate. 1  $\mu$ g of each plasmid was used for transformation. (B) The CFUs of each transformation in the RN4220 strain. The experiments were performed in sextuplicate.

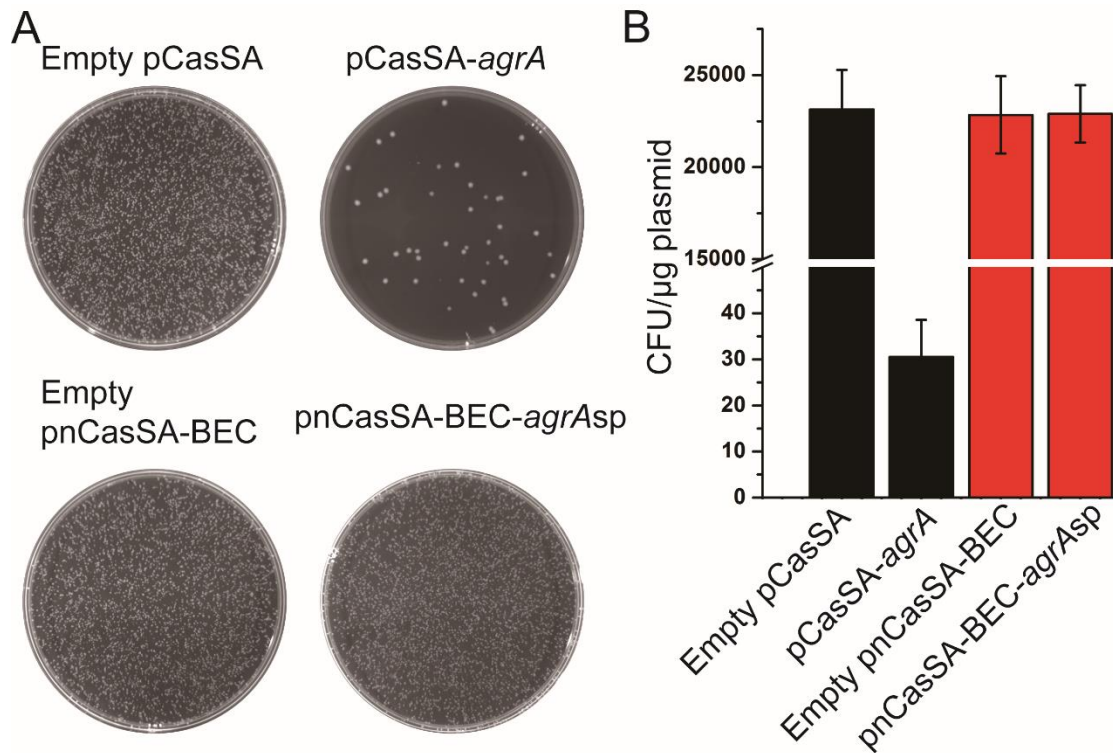



**Figure S6.** The pnCasSA-BEC system enables highly efficient C→T conversion in the clinically isolated *S. aureus* strains. (A, B) Q179 of the *agrA* gene (A) and Q35 of the *cntA* gene (B) of the *S. aureus* Newman strain were successfully mutated to stop codons with 100% efficiencies by using the pnCasSA system. ck: the wild-type strain of Newman. (C, D) Q179 of the *agrA* gene (C) and Q35 of the *cntA* gene (D) of the *S. aureus* USA300 strain were successfully mutated to stop codons with 100% efficiencies by using the pnCasSA system. ck: the wild-type strain of USA300.

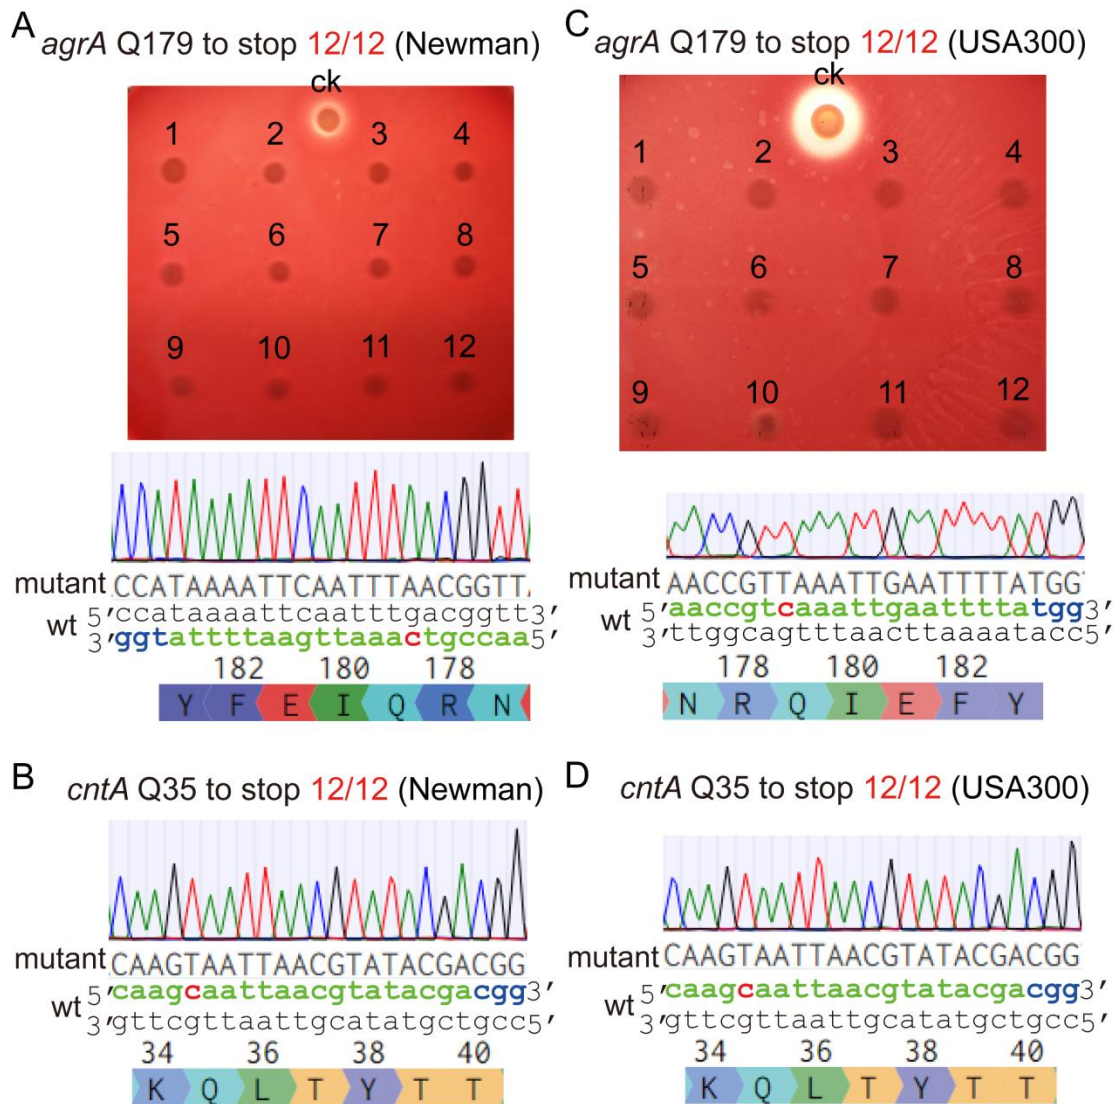

**Figure S7.** Introduction of spacers into the pnCAsSA-BEC plasmid did not reduce transformation CFU in clinically isolated *S. aureus* strains. (A) The transformation CFUs of various plasmids in clinically isolated *S. aureus* strains. All the cells transformed with the empty pnCAsSA-BEC, and the pnCAsSA-BEC-*agrAsp* plasmids were plated individually onto the plates. 1  $\mu$ g of each plasmid was used for transformation. (B) The CFUs of each transformation in the clinically isolated *S. aureus* strains. The experiments were performed in sextuplicate.

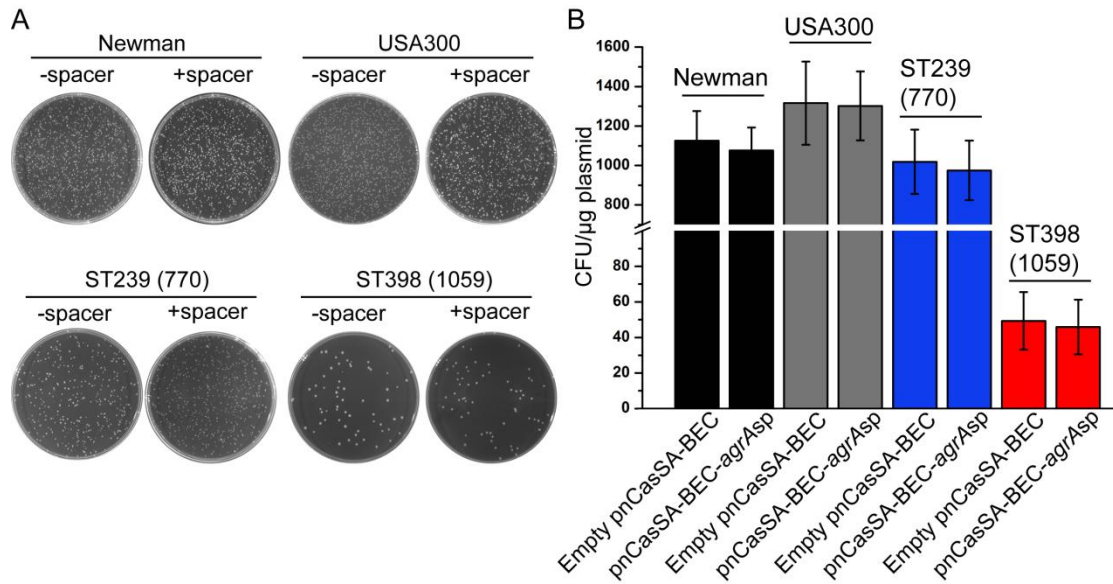

**Figure S8.** The potential codons that can be changed and the potential changed amino acids by the pnCasSA-BEC system. (A) The change is mediated by the C→T conversion. (B) The change is mediated by the G→A conversion.

**A** C→T conversion and the changed amino acid

|          | WT       |     | Mutant |     | WT       |     | Mutant |     | WT       |      | Mutant |      | WT       |      | Mutant |      |   |
|----------|----------|-----|--------|-----|----------|-----|--------|-----|----------|------|--------|------|----------|------|--------|------|---|
| <b>U</b> | UUU      | Phe | —      | —   | UCU      | Ser | UUU    | Phe | UAU      | Tyr  | —      | —    | UGU      | Cys  | —      | —    | U |
|          | UUC      | Phe | UUU    | Phe | UCC      | Ser | UUU    | Phe | UAC      | Tyr  | UAU    | Tyr  | UGC      | Cys  | UGU    | Cys  | C |
|          | UUA      | Leu | —      | —   | UCA      | Ser | UUA    | Leu | UAA      | Stop | —      | —    | UGA      | Stop | —      | —    | A |
|          | UUG      | Leu | —      | —   | UCG      | Ser | UUG    | Leu | UAG      | Stop | —      | —    | UGG      | Trp  | —      | —    | G |
| <b>C</b> | CUU      | Leu | UUU    | Phe | CCU      | Pro | UUU    | Phe | CAU      | His  | UAU    | Tyr  | CGU      | Arg  | UGU    | Cys  | U |
|          | CUC      | Leu | UUU    | Phe | CCC      | Pro | UUU    | Phe | CAC      | His  | UAU    | Tyr  | CGC      | Arg  | UGU    | Cys  | C |
|          | CUA      | Leu | UUA    | Leu | CCA      | Pro | UUA    | Leu | CAA      | Gln  | UAA    | Stop | CGA      | Arg  | UGA    | Stop | A |
|          | CUG      | Leu | UUG    | Leu | CCG      | Pro | UUG    | Leu | CAG      | Gln  | UAG    | Stop | CGG      | Arg  | UGG    | Trp  | G |
| <b>A</b> | AUU      | Ile | —      | —   | ACU      | Thr | AUU    | Ile | AAU      | Asn  | —      | —    | AGU      | Ser  | —      | —    | U |
|          | AUC      | Ile | AUU    | Ile | ACC      | Thr | AUU    | Ile | AAC      | Asn  | AAU    | Asn  | AGC      | Ser  | AGU    | Ser  | C |
|          | AUA      | Ile | —      | —   | ACA      | Thr | AUA    | Ile | AAA      | Lys  | —      | —    | AGA      | Arg  | —      | —    | A |
|          | AUG      | Met | —      | —   | ACG      | Thr | AUG    | Met | AAG      | Lys  | —      | —    | AGG      | Arg  | —      | —    | G |
| <b>G</b> | GUU      | Val | —      | —   | GCU      | Aha | GUU    | Val | GAU      | Asp  | —      | —    | GGU      | Gly  | —      | —    | U |
|          | GUC      | Val | GUU    | Val | GCC      | Aha | GUU    | Val | GAC      | Asp  | GAU    | Asp  | GGC      | Gly  | GGU    | Gly  | C |
|          | GUA      | Val | —      | —   | GCA      | Aha | GUA    | Val | GAA      | Glu  | —      | —    | GGA      | Gly  | —      | —    | A |
|          | GUG      | Val | —      | —   | GCG      | Aha | GUG    | Val | GAG      | Glu  | —      | —    | GGG      | Gly  | —      | —    | G |
|          | <b>U</b> |     |        |     | <b>C</b> |     |        |     | <b>A</b> |      |        |      | <b>G</b> |      |        |      |   |

**B** G→A conversion and the changed amino acid

|          | WT       |     | Mutant |     | WT       |     | Mutant |     | WT       |      | Mutant |      | WT       |      | Mutant |      |   |
|----------|----------|-----|--------|-----|----------|-----|--------|-----|----------|------|--------|------|----------|------|--------|------|---|
| <b>U</b> | UUU      | Phe | —      | —   | UCU      | Ser | —      | —   | UAU      | Tyr  | —      | —    | UGU      | Cys  | UAU    | Tyr  | U |
|          | UUC      | Phe | —      | —   | UCC      | Ser | —      | —   | UAC      | Tyr  | —      | —    | UGC      | Cys  | UAC    | Tyr  | C |
|          | UUA      | Leu | —      | —   | UCA      | Ser | —      | —   | UAA      | Stop | —      | —    | UGA      | Stop | UAA    | Stop | A |
|          | UUG      | Leu | UUA    | Leu | UCG      | Ser | UCA    | Ser | UAG      | Stop | UAA    | Stop | UGG      | Trp  | UAA    | Stop | G |
| <b>C</b> | CUU      | Leu | —      | —   | CCU      | Pro | —      | —   | CAU      | His  | —      | —    | CGU      | Arg  | CAU    | His  | U |
|          | CUC      | Leu | —      | —   | CCC      | Pro | —      | —   | CAC      | His  | —      | —    | CGC      | Arg  | CAC    | His  | C |
|          | CUA      | Leu | —      | —   | CCA      | Pro | —      | —   | CAA      | Gln  | —      | —    | CGA      | Arg  | CAA    | Gln  | A |
|          | CUG      | Leu | CUA    | Leu | CCG      | Pro | CCA    | Pro | CAG      | Gln  | CAA    | Gln  | CGG      | Arg  | CAA    | Gln  | G |
| <b>A</b> | AUU      | Ile | —      | —   | ACU      | Thr | —      | —   | AAU      | Asn  | —      | —    | AGU      | Ser  | AAU    | Asn  | U |
|          | AUC      | Ile | —      | —   | ACC      | Thr | —      | —   | AAC      | Asn  | —      | —    | AGC      | Ser  | AAC    | Asn  | C |
|          | AUA      | Ile | —      | —   | ACA      | Thr | —      | —   | AAA      | Lys  | —      | —    | AGA      | Arg  | AAA    | Lys  | A |
|          | AUG      | Met | AUA    | Ile | ACG      | Thr | ACA    | Thr | AAG      | Lys  | AAA    | Lys  | AGG      | Arg  | AAA    | Lys  | G |
| <b>G</b> | GUU      | Val | AUU    | Ile | GCU      | Aha | ACU    | Thr | GAU      | Asp  | AAU    | Asn  | GGU      | Gly  | AAU    | Asn  | U |
|          | GUC      | Val | AUC    | Ile | GCC      | Aha | ACC    | Thr | GAC      | Asp  | AAC    | Asn  | GGC      | Gly  | AAC    | Asn  | C |
|          | GUA      | Val | AUA    | Ile | GCA      | Aha | ACA    | Thr | GAA      | Glu  | AAA    | Lys  | GGA      | Gly  | AAA    | Lys  | A |
|          | GUG      | Val | AUA    | Ile | GCG      | Aha | ACA    | Thr | GAG      | Glu  | AAA    | Lys  | GGG      | Gly  | AAA    | Lys  | G |
|          | <b>U</b> |     |        |     | <b>C</b> |     |        |     | <b>A</b> |      |        |      | <b>G</b> |      |        |      |   |

**Table S1.** The possible editable stop sites in the MRSA252 strain.

|       |        |        |         |         |         |         |         |
|-------|--------|--------|---------|---------|---------|---------|---------|
| 2465  | 346884 | 691593 | 1078955 | 1431234 | 1761155 | 2119498 | 2484825 |
| 2843  | 346892 | 691614 | 1078956 | 1431602 | 1761617 | 2120146 | 2485571 |
| 3685  | 347110 | 691644 | 1079008 | 1432877 | 1761815 | 2121421 | 2485604 |
| 3721  | 347279 | 691647 | 1079365 | 1434327 | 1763085 | 2123545 | 2485874 |
| 4305  | 347280 | 692456 | 1079577 | 1434328 | 1763868 | 2123677 | 2485962 |
| 4413  | 347356 | 692655 | 1079914 | 1434608 | 1764186 | 2124559 | 2485963 |
| 4668  | 348255 | 692656 | 1079964 | 1434800 | 1764372 | 2124560 | 2486213 |
| 4749  | 348402 | 694226 | 1080462 | 1436689 | 1764828 | 2125884 | 2486453 |
| 4770  | 348435 | 694343 | 1080513 | 1438006 | 1765110 | 2127041 | 2486771 |
| 5085  | 348861 | 695350 | 1080775 | 1438264 | 1765332 | 2127562 | 2486853 |
| 5484  | 349062 | 695530 | 1080776 | 1438705 | 1765731 | 2127762 | 2486854 |
| 6069  | 350580 | 696032 | 1081906 | 1439104 | 1765899 | 2127966 | 2489580 |
| 6162  | 351015 | 696033 | 1082318 | 1439511 | 1766632 | 2127980 | 2489706 |
| 6471  | 351084 | 696462 | 1082453 | 1440086 | 1766728 | 2129126 | 2492235 |
| 6768  | 351309 | 696525 | 1083126 | 1440919 | 1767190 | 2129388 | 2493603 |
| 7170  | 352020 | 697053 | 1084299 | 1441453 | 1767884 | 2129389 | 2493732 |
| 8586  | 352168 | 697065 | 1084345 | 1441639 | 1767887 | 2129450 | 2493735 |
| 8610  | 352414 | 697887 | 1084366 | 1442098 | 1768192 | 2129495 | 2493837 |
| 8982  | 352705 | 698139 | 1085017 | 1442099 | 1768307 | 2129537 | 2494182 |
| 9408  | 352708 | 698187 | 1085968 | 1442800 | 1768647 | 2129839 | 2494640 |
| 9498  | 352822 | 698925 | 1086014 | 1442956 | 1769331 | 2129992 | 2494706 |
| 11296 | 354762 | 698937 | 1086159 | 1443472 | 1769382 | 2130815 | 2494719 |
| 11431 | 355287 | 699620 | 1086192 | 1443650 | 1769673 | 2131163 | 2495418 |
| 11482 | 356178 | 699621 | 1086652 | 1443653 | 1770270 | 2131802 | 2495454 |
| 11629 | 356703 | 700156 | 1087247 | 1443695 | 1770729 | 2132382 | 2495841 |
| 12232 | 357002 | 700537 | 1087379 | 1443797 | 1770879 | 2132497 | 2495931 |
| 13620 | 357005 | 700674 | 1087493 | 1443863 | 1771489 | 2132623 | 2496334 |
| 13653 | 357281 | 700858 | 1087649 | 1443866 | 1772113 | 2133146 | 2496517 |
| 15501 | 357350 | 701092 | 1087709 | 1444889 | 1772410 | 2133209 | 2496811 |
| 15582 | 357551 | 701621 | 1087772 | 1445432 | 1772557 | 2133716 | 2498009 |
| 15585 | 357602 | 701671 | 1087865 | 1445876 | 1772971 | 2133965 | 2498925 |
| 16282 | 357776 | 701696 | 1088321 | 1446293 | 1773181 | 2134016 | 2498926 |
| 16435 | 358504 | 701733 | 1088936 | 1446864 | 1773208 | 2134115 | 2499092 |
| 16612 | 358579 | 701734 | 1089194 | 1446865 | 1773934 | 2134229 | 2500622 |
| 16915 | 360212 | 701741 | 1089218 | 1446989 | 1774245 | 2134253 | 2500650 |
| 17828 | 360213 | 702480 | 1089289 | 1447834 | 1774802 | 2134310 | 2500651 |
| 18475 | 360307 | 702481 | 1089319 | 1448390 | 1775349 | 2135194 | 2500682 |
| 19081 | 361081 | 704427 | 1089361 | 1449954 | 1775350 | 2135667 | 2500799 |
| 20292 | 361684 | 704430 | 1089421 | 1450527 | 1775637 | 2135668 | 2501327 |
| 20968 | 361873 | 704955 | 1089586 | 1451036 | 1776329 | 2136023 | 2503158 |
| 21673 | 362026 | 705497 | 1089703 | 1451135 | 1777208 | 2136182 | 2504244 |
| 21721 | 362134 | 705671 | 1089871 | 1451136 | 1777505 | 2137073 | 2504268 |

|       |        |        |         |         |         |         |         |
|-------|--------|--------|---------|---------|---------|---------|---------|
| 22012 | 362236 | 705782 | 1090204 | 1451504 | 1777595 | 2137149 | 2505971 |
| 22057 | 362770 | 706022 | 1091529 | 1451795 | 1778162 | 2137150 | 2506049 |
| 22457 | 362929 | 706270 | 1091530 | 1452773 | 1779201 | 2138143 | 2506109 |
| 22931 | 363425 | 706729 | 1092100 | 1453315 | 1779909 | 2138356 | 2506151 |
| 25269 | 363426 | 706939 | 1092190 | 1453316 | 1779936 | 2138605 | 2506985 |
| 25590 | 363452 | 707838 | 1093149 | 1453704 | 1780386 | 2138611 | 2507165 |
| 25983 | 363453 | 707916 | 1093447 | 1453938 | 1780818 | 2140207 | 2507522 |
| 26160 | 364156 | 708587 | 1093448 | 1454587 | 1780944 | 2140273 | 2507915 |
| 26295 | 364324 | 708812 | 1093521 | 1454588 | 1780947 | 2140361 | 2509830 |
| 26889 | 364987 | 710601 | 1093545 | 1454799 | 1782235 | 2140362 | 2509941 |
| 26919 | 365197 | 710679 | 1093665 | 1454871 | 1782457 | 2140405 | 2510154 |
| 28417 | 365602 | 711055 | 1093713 | 1454911 | 1782490 | 2140416 | 2510670 |
| 28465 | 365632 | 711056 | 1093887 | 1454912 | 1782715 | 2141431 | 2511921 |
| 28963 | 365734 | 712191 | 1093989 | 1455066 | 1782748 | 2141572 | 2512605 |
| 31040 | 366300 | 713442 | 1093992 | 1456380 | 1783600 | 2141836 | 2513165 |
| 31124 | 366456 | 713944 | 1094025 | 1456533 | 1783894 | 2142034 | 2513228 |
| 31451 | 367089 | 714884 | 1094094 | 1456602 | 1784420 | 2142172 | 2515034 |
| 31667 | 367464 | 715142 | 1094553 | 1456867 | 1785302 | 2142722 | 2515097 |
| 32510 | 367494 | 715173 | 1095515 | 1456892 | 1785662 | 2143143 | 2515163 |
| 32539 | 368040 | 715224 | 1095536 | 1456893 | 1786999 | 2143637 | 2515519 |
| 32894 | 368043 | 715440 | 1096236 | 1456906 | 1787089 | 2144574 | 2515696 |
| 32945 | 368376 | 715539 | 1096257 | 1457530 | 1787275 | 2144849 | 2516236 |
| 33185 | 369298 | 715788 | 1096524 | 1458038 | 1788546 | 2144981 | 2516350 |
| 33819 | 369542 | 716560 | 1096629 | 1458366 | 1788972 | 2145643 | 2517963 |
| 33939 | 369608 | 716776 | 1097502 | 1458367 | 1789548 | 2146223 | 2519955 |
| 35691 | 369647 | 716887 | 1097789 | 1459443 | 1789551 | 2146652 | 2520426 |
| 36678 | 370724 | 717159 | 1097987 | 1459557 | 1789947 | 2146772 | 2520794 |
| 36893 | 370856 | 717384 | 1099505 | 1459581 | 1790826 | 2147236 | 2522787 |
| 37548 | 371396 | 717474 | 1099655 | 1460395 | 1791550 | 2147570 | 2523207 |
| 37557 | 371420 | 717864 | 1100012 | 1460652 | 1792534 | 2147571 | 2524568 |
| 37629 | 372190 | 719548 | 1100787 | 1461877 | 1792990 | 2149263 | 2524571 |
| 37962 | 372952 | 720427 | 1100838 | 1464032 | 1793697 | 2149264 | 2524700 |
| 38425 | 373771 | 721582 | 1100868 | 1464485 | 1793943 | 2149385 | 2525615 |
| 39364 | 373949 | 721948 | 1101075 | 1465328 | 1794343 | 2149421 | 2525741 |
| 39634 | 373952 | 722864 | 1101498 | 1465832 | 1795344 | 2149649 | 2527372 |
| 40296 | 374183 | 722947 | 1102205 | 1465977 | 1795364 | 2151139 | 2528364 |
| 40830 | 374192 | 723028 | 1102262 | 1466139 | 1795748 | 2151142 | 2528388 |
| 40920 | 374249 | 723223 | 1102724 | 1466457 | 1796416 | 2151567 | 2529096 |
| 40956 | 374363 | 723253 | 1103527 | 1466559 | 1796417 | 2152370 | 2529234 |
| 41046 | 374366 | 723337 | 1105415 | 1467269 | 1796433 | 2153371 | 2529255 |
| 41187 | 374541 | 723920 | 1105502 | 1467805 | 1796708 | 2153691 | 2529318 |
| 41277 | 374542 | 723923 | 1105647 | 1468096 | 1797576 | 2154192 | 2530406 |
| 41484 | 374642 | 725544 | 1105648 | 1468733 | 1797577 | 2154330 | 2531497 |

|       |        |        |         |         |         |         |         |
|-------|--------|--------|---------|---------|---------|---------|---------|
| 42024 | 374816 | 725667 | 1106432 | 1468766 | 1797666 | 2155453 | 2532258 |
| 42239 | 375221 | 726603 | 1107235 | 1468943 | 1798344 | 2155648 | 2532429 |
| 44277 | 375858 | 728086 | 1108522 | 1469000 | 1798932 | 2156202 | 2532646 |
| 44343 | 376141 | 728748 | 1108537 | 1469003 | 1799274 | 2156295 | 2532647 |
| 44577 | 376928 | 728958 | 1109597 | 1469027 | 1799415 | 2156436 | 2532696 |
| 45017 | 377039 | 731745 | 1109951 | 1469387 | 1799508 | 2156781 | 2534489 |
| 45629 | 377615 | 731820 | 1110308 | 1469643 | 1799662 | 2156976 | 2534516 |
| 45740 | 377708 | 732108 | 1110691 | 1470258 | 1799663 | 2157072 | 2534558 |
| 46130 | 378239 | 732441 | 1111328 | 1470790 | 1799790 | 2157443 | 2534561 |
| 46328 | 378850 | 732567 | 1112964 | 1471081 | 1800407 | 2157632 | 2534597 |
| 46457 | 378851 | 732605 | 1112985 | 1472882 | 1801652 | 2157779 | 2536631 |
| 47853 | 379474 | 733384 | 1113048 | 1473323 | 1802127 | 2157809 | 2536632 |
| 48884 | 379475 | 734632 | 1113234 | 1473324 | 1804327 | 2157875 | 2536892 |
| 49231 | 380313 | 734649 | 1113354 | 1473326 | 1804465 | 2158017 | 2536893 |
| 51644 | 380670 | 734847 | 1113447 | 1473327 | 1804544 | 2158018 | 2537125 |
| 51918 | 380679 | 734988 | 1113576 | 1473697 | 1804545 | 2158704 | 2537377 |
| 52182 | 380808 | 735833 | 1113609 | 1474312 | 1804597 | 2159451 | 2537551 |
| 52961 | 380850 | 737449 | 1114089 | 1474691 | 1804633 | 2159814 | 2538058 |
| 53493 | 380946 | 737757 | 1114440 | 1474709 | 1805137 | 2160323 | 2538449 |
| 53559 | 381847 | 737773 | 1114815 | 1475075 | 1805835 | 2160475 | 2538450 |
| 54721 | 382036 | 737774 | 1114932 | 1475690 | 1805904 | 2162642 | 2542735 |
| 54741 | 382090 | 738037 | 1116300 | 1476347 | 1806138 | 2162882 | 2543904 |
| 55125 | 382126 | 738038 | 1116594 | 1476452 | 1806142 | 2163048 | 2545179 |
| 55793 | 382340 | 740124 | 1117050 | 1477591 | 1806508 | 2163049 | 2549999 |
| 55794 | 382481 | 741518 | 1117488 | 1478119 | 1806829 | 2163065 | 2550236 |
| 55810 | 382879 | 741521 | 1117626 | 1478257 | 1808923 | 2163107 | 2551040 |
| 56085 | 382880 | 742299 | 1117998 | 1480184 | 1809094 | 2163335 | 2551041 |
| 56953 | 384399 | 743574 | 1117999 | 1480611 | 1809705 | 2163371 | 2551294 |
| 56954 | 384525 | 745927 | 1118779 | 1480743 | 1810068 | 2163804 | 2552976 |
| 57043 | 384642 | 746311 | 1119127 | 1481118 | 1812418 | 2163823 | 2553427 |
| 57721 | 386447 | 746508 | 1119274 | 1481950 | 1812676 | 2163994 | 2553532 |
| 58309 | 386489 | 746737 | 1120069 | 1482055 | 1812871 | 2165966 | 2553694 |
| 58651 | 386720 | 747643 | 1120529 | 1482181 | 1813161 | 2167077 | 2553931 |
| 58792 | 387897 | 747789 | 1120727 | 1482622 | 1813447 | 2167263 | 2554060 |
| 58885 | 388020 | 749858 | 1122141 | 1482817 | 1813944 | 2167657 | 2554724 |
| 59039 | 388650 | 751055 | 1122270 | 1482853 | 1813977 | 2167876 | 2555750 |
| 59040 | 388715 | 752340 | 1122513 | 1483195 | 1814529 | 2168641 | 2556062 |
| 59167 | 388752 | 753267 | 1122973 | 1483227 | 1814532 | 2168764 | 2556065 |
| 59784 | 389950 | 753326 | 1122976 | 1483228 | 1814754 | 2169895 | 2556741 |
| 61029 | 390837 | 754556 | 1123027 | 1483529 | 1814973 | 2170027 | 2556837 |
| 61294 | 391202 | 755069 | 1123660 | 1483997 | 1815270 | 2172466 | 2557032 |
| 61511 | 391343 | 756554 | 1124117 | 1484921 | 1815435 | 2173945 | 2557497 |
| 62156 | 391481 | 756764 | 1124218 | 1484999 | 1816359 | 2173987 | 2557553 |

|       |        |        |         |         |         |         |         |
|-------|--------|--------|---------|---------|---------|---------|---------|
| 62259 | 391760 | 757063 | 1124227 | 1485275 | 1816413 | 2175622 | 2557967 |
| 62318 | 391886 | 757399 | 1124678 | 1485503 | 1817055 | 2177027 | 2558467 |
| 62539 | 392222 | 758115 | 1124925 | 1486426 | 1818531 | 2177261 | 2558937 |
| 63779 | 392875 | 758613 | 1124958 | 1488592 | 1819383 | 2178017 | 2559116 |
| 64004 | 395435 | 759888 | 1125602 | 1489283 | 1819407 | 2178323 | 2559117 |
| 64055 | 395534 | 760478 | 1125768 | 1489857 | 1820091 | 2178572 | 2559240 |
| 64064 | 396605 | 760934 | 1126452 | 1490118 | 1820274 | 2178917 | 2559577 |
| 64442 | 396794 | 760961 | 1126522 | 1490157 | 1820304 | 2180363 | 2559623 |
| 64457 | 396797 | 761063 | 1126523 | 1490313 | 1820814 | 2180372 | 2559691 |
| 64721 | 396837 | 761171 | 1126641 | 1491111 | 1820823 | 2180426 | 2559871 |
| 65213 | 396838 | 761849 | 1127074 | 1491112 | 1820940 | 2180429 | 2560015 |
| 65783 | 397395 | 762099 | 1127132 | 1491128 | 1820976 | 2180486 | 2560258 |
| 65867 | 397876 | 762455 | 1127133 | 1491858 | 1821069 | 2180492 | 2560625 |
| 66110 | 399441 | 762530 | 1127506 | 1492500 | 1821600 | 2180912 | 2560626 |
| 67192 | 399442 | 762596 | 1127514 | 1493672 | 1821603 | 2181652 | 2560661 |
| 67447 | 400024 | 763269 | 1128798 | 1494357 | 1822049 | 2182327 | 2560662 |
| 68275 | 400174 | 763884 | 1129401 | 1494655 | 1822205 | 2184154 | 2560744 |
| 68466 | 400198 | 763901 | 1130421 | 1494924 | 1822442 | 2184559 | 2560906 |
| 69021 | 400432 | 764099 | 1130442 | 1495086 | 1822775 | 2186143 | 2560915 |
| 69729 | 400603 | 764240 | 1132267 | 1495549 | 1823138 | 2186644 | 2561875 |
| 70848 | 400798 | 764712 | 1132558 | 1495698 | 1823567 | 2187325 | 2562699 |
| 71058 | 400822 | 765141 | 1134253 | 1495821 | 1823858 | 2187523 | 2562789 |
| 71109 | 401188 | 765171 | 1134532 | 1495824 | 1823885 | 2188691 | 2562972 |
| 71127 | 401639 | 766117 | 1134562 | 1496467 | 1824803 | 2188752 | 2563161 |
| 73714 | 401954 | 766426 | 1134691 | 1496602 | 1825178 | 2188755 | 2563266 |
| 73894 | 402392 | 766666 | 1134850 | 1496791 | 1825832 | 2188878 | 2563419 |
| 74168 | 403126 | 767482 | 1134890 | 1497191 | 1826522 | 2189085 | 2563563 |
| 75164 | 404318 | 767567 | 1134964 | 1498126 | 1827396 | 2189220 | 2563629 |
| 75458 | 404762 | 768415 | 1135213 | 1498288 | 1827753 | 2189451 | 2563872 |
| 76214 | 404966 | 768466 | 1135576 | 1498321 | 1827756 | 2189956 | 2564799 |
| 76322 | 405074 | 768494 | 1135804 | 1499320 | 1828160 | 2190046 | 2564850 |
| 77625 | 405419 | 768590 | 1135843 | 1499799 | 1828428 | 2190256 | 2564962 |
| 78867 | 406836 | 770146 | 1135846 | 1499815 | 1828429 | 2190571 | 2564963 |
| 78999 | 407247 | 770170 | 1136002 | 1499983 | 1828520 | 2191018 | 2565339 |
| 79104 | 407370 | 770468 | 1136107 | 1500127 | 1828658 | 2191451 | 2565537 |
| 79539 | 407712 | 770911 | 1136209 | 1500193 | 1829324 | 2191452 | 2565540 |
| 80376 | 408675 | 771022 | 1136212 | 1500457 | 1829327 | 2191737 | 2565810 |
| 80706 | 412063 | 771088 | 1136281 | 1500484 | 1829519 | 2192677 | 2566574 |
| 80868 | 412078 | 771730 | 1136665 | 1500613 | 1830262 | 2192707 | 2566856 |
| 81239 | 412934 | 771937 | 1136692 | 1501563 | 1830538 | 2192710 | 2567261 |
| 82760 | 413137 | 772036 | 1137320 | 1503084 | 1830655 | 2192896 | 2567262 |
| 82896 | 414536 | 772180 | 1137449 | 1504188 | 1830785 | 2194185 | 2567275 |
| 84796 | 414554 | 773151 | 1138041 | 1504602 | 1830786 | 2195029 | 2567498 |

|        |        |        |         |         |         |         |         |
|--------|--------|--------|---------|---------|---------|---------|---------|
| 85096  | 414840 | 773538 | 1138453 | 1504701 | 1831532 | 2195335 | 2567499 |
| 85228  | 415086 | 773751 | 1138456 | 1504992 | 1831688 | 2195632 | 2568127 |
| 85627  | 415338 | 773862 | 1138480 | 1505163 | 1832075 | 2195893 | 2568744 |
| 85649  | 415547 | 774132 | 1138514 | 1505223 | 1832386 | 2196070 | 2568747 |
| 86291  | 416025 | 776179 | 1138898 | 1505394 | 1833545 | 2196073 | 2571372 |
| 86576  | 416091 | 776239 | 1138899 | 1505454 | 1833614 | 2196460 | 2571656 |
| 86645  | 417680 | 776278 | 1139690 | 1505631 | 1834748 | 2198282 | 2572616 |
| 86762  | 417740 | 776593 | 1140618 | 1505811 | 1834844 | 2199389 | 2572817 |
| 86909  | 419011 | 777584 | 1140666 | 1506213 | 1834991 | 2199392 | 2572928 |
| 88108  | 419867 | 778190 | 1141554 | 1506705 | 1835814 | 2199416 | 2574225 |
| 88360  | 420412 | 778455 | 1141955 | 1506828 | 1836453 | 2199455 | 2574226 |
| 88939  | 420534 | 778456 | 1141958 | 1506831 | 1837790 | 2199632 | 2574864 |
| 89641  | 422256 | 778700 | 1141985 | 1506882 | 1837865 | 2199704 | 2576058 |
| 89649  | 422433 | 778895 | 1142393 | 1506885 | 1838390 | 2200368 | 2577108 |
| 89733  | 422658 | 778940 | 1142899 | 1507173 | 1838549 | 2200464 | 2577924 |
| 89766  | 422760 | 779187 | 1142902 | 1507509 | 1838807 | 2200772 | 2577984 |
| 89826  | 422781 | 779781 | 1143482 | 1507881 | 1840013 | 2200811 | 2578080 |
| 90021  | 423081 | 780261 | 1143735 | 1507884 | 1840716 | 2200922 | 2578164 |
| 91053  | 424844 | 780813 | 1145407 | 1508259 | 1841136 | 2200925 | 2578912 |
| 91167  | 425363 | 781331 | 1145930 | 1508262 | 1841268 | 2203771 | 2578945 |
| 91242  | 425390 | 782783 | 1146254 | 1508268 | 1842012 | 2204338 | 2579168 |
| 91285  | 425848 | 783386 | 1146320 | 1508820 | 1842768 | 2205139 | 2579169 |
| 92085  | 427379 | 785388 | 1146413 | 1509768 | 1842828 | 2205202 | 2580402 |
| 93811  | 427830 | 785967 | 1148246 | 1510317 | 1843230 | 2205250 | 2585927 |
| 94078  | 427869 | 786440 | 1149887 | 1510476 | 1843284 | 2205915 | 2587115 |
| 94654  | 429275 | 786803 | 1149977 | 1510521 | 1843468 | 2206126 | 2587523 |
| 94781  | 432714 | 786806 | 1151244 | 1510695 | 1843469 | 2206204 | 2587691 |
| 94811  | 433191 | 787012 | 1151301 | 1510854 | 1843552 | 2206318 | 2587754 |
| 95354  | 433446 | 787081 | 1151625 | 1510899 | 1843553 | 2206561 | 2588763 |
| 97749  | 433842 | 787531 | 1151742 | 1511028 | 1844934 | 2206687 | 2588877 |
| 98068  | 434133 | 787810 | 1152140 | 1511577 | 1845216 | 2207038 | 2589271 |
| 98082  | 434670 | 787975 | 1152389 | 1511889 | 1845405 | 2207238 | 2590130 |
| 98611  | 435374 | 788704 | 1153199 | 1512033 | 1845429 | 2207325 | 2590274 |
| 98614  | 435827 | 789267 | 1153589 | 1513167 | 1845861 | 2207604 | 2591649 |
| 98635  | 435917 | 789333 | 1153685 | 1513719 | 1846560 | 2207889 | 2592587 |
| 98819  | 435965 | 789405 | 1153907 | 1514430 | 1846809 | 2208213 | 2593526 |
| 98900  | 436128 | 789687 | 1154286 | 1514730 | 1846842 | 2208297 | 2594246 |
| 98942  | 436129 | 789885 | 1154799 | 1516518 | 1847019 | 2208330 | 2594249 |
| 99230  | 436439 | 790107 | 1155782 | 1517394 | 1847286 | 2208396 | 2594270 |
| 99365  | 436508 | 790230 | 1157092 | 1517706 | 1847316 | 2208594 | 2594666 |
| 99630  | 438045 | 790699 | 1157194 | 1517772 | 1848490 | 2209640 | 2595074 |
| 99776  | 438628 | 791785 | 1158786 | 1517919 | 1848793 | 2209700 | 2595674 |
| 103302 | 439045 | 791859 | 1159119 | 1518564 | 1851677 | 2209737 | 2598846 |



|        |        |        |         |         |         |         |         |
|--------|--------|--------|---------|---------|---------|---------|---------|
| 103425 | 439084 | 792163 | 1159407 | 1518885 | 1852025 | 2210040 | 2598847 |
| 103463 | 439477 | 792319 | 1159461 | 1518933 | 1852814 | 2211244 | 2600408 |
| 104016 | 440816 | 792790 | 1160628 | 1520445 | 1853138 | 2211821 | 2600923 |
| 106963 | 441398 | 793203 | 1160853 | 1520664 | 1853162 | 2212025 | 2600956 |
| 107613 | 441515 | 793575 | 1161514 | 1520709 | 1853243 | 2213117 | 2600959 |
| 107638 | 441869 | 793956 | 1161550 | 1520823 | 1853466 | 2213775 | 2601148 |
| 107654 | 442120 | 794932 | 1162402 | 1520853 | 1853467 | 2214141 | 2601184 |
| 107655 | 442384 | 795262 | 1162606 | 1521579 | 1854347 | 2214155 | 2601208 |
| 108172 | 442459 | 796205 | 1162717 | 1521714 | 1854907 | 2214167 | 2602531 |
| 108340 | 442558 | 798833 | 1162897 | 1521909 | 1855123 | 2214392 | 2603251 |
| 109759 | 443092 | 799275 | 1163095 | 1521957 | 1855600 | 2214491 | 2603536 |
| 110045 | 443134 | 799755 | 1163173 | 1522116 | 1857687 | 2214755 | 2606963 |
| 111798 | 443975 | 800478 | 1163644 | 1522242 | 1857735 | 2215190 | 2608486 |
| 111924 | 444413 | 800977 | 1164226 | 1522275 | 1857795 | 2215217 | 2608487 |
| 112572 | 444644 | 801220 | 1164709 | 1522344 | 1858313 | 2215370 | 2609813 |
| 113206 | 444833 | 801223 | 1165699 | 1522689 | 1859184 | 2215400 | 2609814 |
| 114582 | 445149 | 801250 | 1165879 | 1523469 | 1859454 | 2215484 | 2610329 |
| 116170 | 445646 | 801589 | 1166218 | 1524399 | 1859655 | 2215487 | 2610330 |
| 117833 | 445917 | 801649 | 1166293 | 1524996 | 1859907 | 2215818 | 2610739 |
| 119129 | 445918 | 801892 | 1166669 | 1526022 | 1860292 | 2215819 | 2610931 |
| 119357 | 445922 | 802868 | 1167337 | 1526118 | 1860617 | 2215856 | 2611438 |
| 119849 | 446018 | 803697 | 1167382 | 1526268 | 1860938 | 2215986 | 2611834 |
| 119852 | 446084 | 803985 | 1168153 | 1526520 | 1861013 | 2215987 | 2612395 |
| 120212 | 446292 | 804387 | 1168840 | 1526682 | 1861181 | 2216051 | 2612506 |
| 120428 | 446293 | 804411 | 1169715 | 1527051 | 1861445 | 2216132 | 2613703 |
| 120549 | 449711 | 806204 | 1169769 | 1527192 | 1862632 | 2216144 | 2616603 |
| 120550 | 449795 | 807735 | 1169886 | 1527282 | 1863939 | 2216213 | 2617052 |
| 120590 | 451062 | 808128 | 1169889 | 1528242 | 1864740 | 2216592 | 2617139 |
| 121538 | 454102 | 808131 | 1170156 | 1528998 | 1865092 | 2216593 | 2617535 |
| 122249 | 454150 | 808245 | 1170420 | 1529187 | 1865321 | 2216654 | 2617721 |
| 122835 | 454809 | 808374 | 1170915 | 1529262 | 1865637 | 2216783 | 2617863 |
| 123155 | 455376 | 808512 | 1171110 | 1529721 | 1867129 | 2216822 | 2617864 |
| 123284 | 455469 | 808890 | 1171263 | 1529749 | 1867306 | 2217853 | 2618009 |
| 123287 | 456643 | 809064 | 1173165 | 1529750 | 1868172 | 2218140 | 2618885 |
| 123471 | 456736 | 809456 | 1173339 | 1529981 | 1868490 | 2218171 | 2618957 |
| 123941 | 458048 | 809879 | 1173543 | 1530069 | 1869574 | 2218179 | 2619200 |
| 124409 | 458397 | 810173 | 1174229 | 1530993 | 1870006 | 2218255 | 2619675 |
| 124976 | 458568 | 810575 | 1174512 | 1531011 | 1870030 | 2218256 | 2619775 |
| 125159 | 458835 | 811465 | 1174617 | 1531014 | 1870078 | 2218464 | 2619966 |
| 125852 | 458943 | 811555 | 1175851 | 1531089 | 1870965 | 2218605 | 2622366 |
| 127373 | 460653 | 811556 | 1177415 | 1531782 | 1870998 | 2218660 | 2623165 |
| 127374 | 460689 | 811659 | 1178180 | 1532628 | 1871292 | 2218661 | 2623629 |
| 128388 | 460692 | 811830 | 1178804 | 1533060 | 1871880 | 2219083 | 2625225 |

|        |        |        |         |         |         |         |         |
|--------|--------|--------|---------|---------|---------|---------|---------|
| 128889 | 461985 | 811887 | 1179088 | 1533240 | 1872418 | 2219084 | 2625376 |
| 128937 | 462286 | 812130 | 1180502 | 1533243 | 1873078 | 2219085 | 2625661 |
| 129234 | 462287 | 812148 | 1180503 | 1533468 | 1873821 | 2219936 | 2625751 |
| 131273 | 462974 | 812395 | 1180764 | 1533531 | 1873869 | 2220050 | 2625754 |
| 131681 | 463522 | 813424 | 1182301 | 1533864 | 1874736 | 2220648 | 2626558 |
| 131799 | 463546 | 814203 | 1182902 | 1533922 | 1875292 | 2221236 | 2627150 |
| 131927 | 465158 | 814353 | 1184177 | 1533923 | 1875577 | 2221422 | 2627151 |
| 132098 | 465329 | 814764 | 1184501 | 1533975 | 1876949 | 2222025 | 2628750 |
| 132187 | 465803 | 814767 | 1184516 | 1534752 | 1877183 | 2222112 | 2628906 |
| 132370 | 466403 | 814932 | 1185895 | 1534788 | 1877237 | 2222229 | 2629059 |
| 132673 | 470464 | 815528 | 1186511 | 1534926 | 1878002 | 2222906 | 2629317 |
| 133252 | 473300 | 815597 | 1186646 | 1534977 | 1878104 | 2223368 | 2629671 |
| 133255 | 474593 | 817071 | 1188051 | 1537090 | 1878539 | 2223496 | 2629749 |
| 133369 | 477089 | 817635 | 1188390 | 1538827 | 1878816 | 2223564 | 2630218 |
| 133618 | 477206 | 817652 | 1188967 | 1539109 | 1878817 | 2224922 | 2630372 |
| 133837 | 480843 | 818924 | 1189144 | 1539112 | 1879632 | 2225210 | 2630373 |
| 133955 | 480939 | 818936 | 1189848 | 1539343 | 1879929 | 2225243 | 2630675 |
| 134153 | 481029 | 818963 | 1189875 | 1539635 | 1880461 | 2226119 | 2630676 |
| 134213 | 481113 | 819779 | 1189998 | 1540226 | 1880500 | 2226292 | 2630678 |
| 134237 | 481230 | 820086 | 1190623 | 1540238 | 1881100 | 2226469 | 2631401 |
| 134330 | 481401 | 821689 | 1191135 | 1540277 | 1881157 | 2226547 | 2631402 |
| 134564 | 482070 | 822275 | 1191726 | 1541402 | 1881505 | 2226658 | 2631913 |
| 134687 | 482253 | 822431 | 1192544 | 1541942 | 1881939 | 2227090 | 2632033 |
| 135171 | 482568 | 822575 | 1193979 | 1542246 | 1882263 | 2227201 | 2632126 |
| 135262 | 482695 | 822584 | 1194853 | 1542855 | 1882380 | 2227267 | 2632248 |
| 135263 | 482763 | 822902 | 1195081 | 1542951 | 1882434 | 2228521 | 2632620 |
| 135567 | 484509 | 823533 | 1195141 | 1543050 | 1882806 | 2228923 | 2632644 |
| 135861 | 485169 | 823534 | 1195694 | 1543095 | 1882848 | 2229184 | 2632923 |
| 136293 | 485878 | 823547 | 1196276 | 1543365 | 1882851 | 2229727 | 2633110 |
| 136749 | 485879 | 823793 | 1196315 | 1544433 | 1883556 | 2229844 | 2633236 |
| 136837 | 485880 | 825923 | 1196318 | 1544583 | 1883964 | 2229911 | 2633557 |
| 137116 | 486147 | 826749 | 1196680 | 1544667 | 1885563 | 2229912 | 2633620 |
| 137390 | 487374 | 827340 | 1196849 | 1546603 | 1886001 | 2230821 | 2634642 |
| 137497 | 487773 | 827621 | 1196924 | 1546630 | 1886508 | 2231329 | 2635736 |
| 137500 | 487777 | 827639 | 1197066 | 1547733 | 1887651 | 2231659 | 2636417 |
| 137902 | 487778 | 828752 | 1197067 | 1547987 | 1887838 | 2233024 | 2636956 |
| 137908 | 488019 | 830083 | 1197117 | 1548416 | 1887839 | 2234416 | 2637098 |
| 138039 | 488400 | 830098 | 1197308 | 1548489 | 1888593 | 2235738 | 2637666 |
| 138430 | 488538 | 831955 | 1197572 | 1548807 | 1888617 | 2236230 | 2637810 |
| 139304 | 488914 | 833471 | 1197832 | 1548808 | 1888722 | 2237001 | 2638993 |
| 139612 | 489118 | 833663 | 1198375 | 1548884 | 1890188 | 2237077 | 2639044 |
| 140296 | 489448 | 833792 | 1199017 | 1549412 | 1890189 | 2237078 | 2639173 |
| 140299 | 490194 | 834821 | 1199718 | 1549494 | 1891430 | 2237820 | 2639224 |

|        |        |        |         |         |         |         |         |
|--------|--------|--------|---------|---------|---------|---------|---------|
| 140398 | 490446 | 834947 | 1199766 | 1549495 | 1891580 | 2238233 | 2639296 |
| 140749 | 490665 | 835139 | 1200090 | 1550066 | 1891638 | 2239478 | 2639525 |
| 140869 | 490872 | 836534 | 1200138 | 1550507 | 1891847 | 2240243 | 2639546 |
| 140898 | 490948 | 839184 | 1200330 | 1550655 | 1892450 | 2240405 | 2639667 |
| 141028 | 490949 | 839185 | 1200504 | 1552147 | 1893011 | 2240426 | 2639681 |
| 141136 | 490968 | 839528 | 1200820 | 1552603 | 1893428 | 2240495 | 2640011 |
| 141492 | 490971 | 840140 | 1200821 | 1553152 | 1893719 | 2240534 | 2640014 |
| 142618 | 491172 | 840434 | 1200837 | 1553366 | 1895134 | 2242232 | 2641204 |
| 142708 | 491592 | 840981 | 1200990 | 1553367 | 1895434 | 2243095 | 2644593 |
| 142822 | 491649 | 840982 | 1201137 | 1553510 | 1897132 | 2243351 | 2646738 |
| 142906 | 492486 | 841067 | 1201272 | 1553511 | 1897519 | 2243352 | 2648747 |
| 142960 | 492498 | 841079 | 1201491 | 1554262 | 1897588 | 2243836 | 2648819 |
| 143031 | 493027 | 842201 | 1201582 | 1554265 | 1899057 | 2243944 | 2648822 |
| 143137 | 493028 | 842681 | 1201583 | 1555026 | 1899066 | 2244508 | 2648894 |
| 145910 | 493110 | 842909 | 1201662 | 1555291 | 1899705 | 2244613 | 2649739 |
| 146033 | 493302 | 842933 | 1202202 | 1556027 | 1899872 | 2244865 | 2650678 |
| 146132 | 493503 | 843315 | 1203757 | 1556261 | 1899920 | 2247359 | 2651242 |
| 146135 | 493593 | 844266 | 1203808 | 1557021 | 1900055 | 2247360 | 2651677 |
| 146565 | 493609 | 845225 | 1204352 | 1558023 | 1900334 | 2247709 | 2652103 |
| 147012 | 493610 | 845819 | 1204353 | 1558086 | 1900535 | 2247943 | 2653577 |
| 147489 | 494886 | 846104 | 1204537 | 1559337 | 1900865 | 2248066 | 2653649 |
| 147699 | 494887 | 846377 | 1204771 | 1559670 | 1900958 | 2248165 | 2653757 |
| 148081 | 495180 | 846401 | 1205971 | 1559724 | 1901042 | 2248376 | 2653955 |
| 148662 | 495321 | 846560 | 1207392 | 1559892 | 1901132 | 2248377 | 2654525 |
| 149679 | 495842 | 847055 | 1207506 | 1560003 | 1901345 | 2248783 | 2654735 |
| 150522 | 497179 | 847379 | 1207587 | 1560378 | 1901447 | 2249131 | 2655026 |
| 150876 | 498220 | 847380 | 1207737 | 1560381 | 1902611 | 2249344 | 2655665 |
| 151221 | 498773 | 847904 | 1207968 | 1560744 | 1904218 | 2249809 | 2655789 |
| 151672 | 499469 | 847988 | 1209521 | 1561790 | 1905053 | 2250202 | 2655790 |
| 152508 | 500060 | 848552 | 1209784 | 1561952 | 1905639 | 2250203 | 2655806 |
| 152511 | 500294 | 848585 | 1209901 | 1562012 | 1905840 | 2250435 | 2656316 |
| 153012 | 500678 | 850100 | 1211062 | 1562907 | 1906443 | 2250537 | 2659817 |
| 153261 | 500813 | 850816 | 1211214 | 1563282 | 1907331 | 2251471 | 2660000 |
| 154442 | 500873 | 850888 | 1211691 | 1563481 | 1907387 | 2251832 | 2660348 |
| 154616 | 500972 | 851743 | 1212212 | 1564078 | 1907846 | 2252156 | 2660447 |
| 155330 | 501248 | 852178 | 1212290 | 1565967 | 1908609 | 2252457 | 2661643 |
| 155387 | 501416 | 852736 | 1212299 | 1567294 | 1908804 | 2253220 | 2662576 |
| 156387 | 501431 | 852769 | 1212888 | 1567316 | 1909164 | 2253250 | 2662705 |
| 156388 | 501458 | 852922 | 1212904 | 1567317 | 1911269 | 2253658 | 2662735 |
| 156401 | 502346 | 853874 | 1213093 | 1568209 | 1911293 | 2253805 | 2662909 |
| 158387 | 502388 | 854075 | 1213094 | 1568212 | 1911961 | 2254608 | 2663035 |
| 159482 | 502574 | 854303 | 1213119 | 1568746 | 1912418 | 2254950 | 2663344 |
| 160644 | 502775 | 854789 | 1213299 | 1568929 | 1912449 | 2255022 | 2664496 |

|        |        |        |         |         |         |         |         |
|--------|--------|--------|---------|---------|---------|---------|---------|
| 160825 | 503281 | 855158 | 1213569 | 1569577 | 1912748 | 2255686 | 2664497 |
| 160826 | 503290 | 855167 | 1214047 | 1569823 | 1913424 | 2255836 | 2664579 |
| 160842 | 503320 | 855389 | 1214048 | 1569955 | 1914247 | 2256102 | 2664879 |
| 161173 | 503329 | 855845 | 1214498 | 1570054 | 1915373 | 2256414 | 2664897 |
| 161174 | 503974 | 856106 | 1214634 | 1570297 | 1915781 | 2257384 | 2665266 |
| 161200 | 504313 | 856151 | 1215726 | 1570483 | 1915879 | 2257801 | 2665712 |
| 161201 | 504325 | 856304 | 1216411 | 1571984 | 1915996 | 2258457 | 2666812 |
| 161753 | 504535 | 856888 | 1217474 | 1572980 | 1916395 | 2258559 | 2667734 |
| 161924 | 505619 | 857289 | 1218520 | 1573497 | 1916590 | 2260125 | 2668760 |
| 162071 | 505667 | 857979 | 1218537 | 1573551 | 1917576 | 2260146 | 2668793 |
| 162080 | 505965 | 858144 | 1218545 | 1573768 | 1917577 | 2260605 | 2669185 |
| 162092 | 505966 | 858145 | 1218789 | 1573769 | 1917752 | 2260731 | 2669281 |
| 162122 | 506048 | 858302 | 1219227 | 1574028 | 1918676 | 2260983 | 2670003 |
| 162377 | 506108 | 858476 | 1219925 | 1575470 | 1919127 | 2261433 | 2671089 |
| 162416 | 506327 | 858731 | 1219928 | 1575949 | 1919128 | 2261682 | 2671821 |
| 162557 | 506341 | 859588 | 1220180 | 1575979 | 1920313 | 2262138 | 2673968 |
| 163520 | 506489 | 859867 | 1220562 | 1576449 | 1920691 | 2262717 | 2674061 |
| 165049 | 507428 | 860338 | 1220575 | 1576479 | 1921398 | 2263311 | 2675619 |
| 166245 | 507842 | 860788 | 1220576 | 1577326 | 1921593 | 2263461 | 2675620 |
| 166277 | 507845 | 861295 | 1220715 | 1577752 | 1921938 | 2264073 | 2676077 |
| 167441 | 508013 | 861778 | 1221048 | 1578043 | 1921951 | 2264411 | 2676409 |
| 168838 | 508097 | 862373 | 1221723 | 1578280 | 1921952 | 2265188 | 2676512 |
| 169312 | 508502 | 862713 | 1221924 | 1578361 | 1922816 | 2265429 | 2676513 |
| 170112 | 508721 | 863391 | 1222467 | 1579404 | 1923311 | 2265430 | 2676673 |
| 170307 | 508772 | 863924 | 1223114 | 1579584 | 1923599 | 2265611 | 2677406 |
| 170772 | 509165 | 864194 | 1224324 | 1581728 | 1924518 | 2265905 | 2677407 |
| 171385 | 509637 | 865912 | 1224567 | 1581833 | 1924671 | 2266032 | 2678132 |
| 172201 | 509736 | 865949 | 1225378 | 1581923 | 1925607 | 2270640 | 2678133 |
| 173093 | 510252 | 866418 | 1225402 | 1582259 | 1926531 | 2271086 | 2678852 |
| 173438 | 510303 | 866995 | 1225918 | 1582892 | 1926552 | 2271425 | 2681649 |
| 173765 | 511223 | 867620 | 1226224 | 1582893 | 1926783 | 2271485 | 2682658 |
| 173963 | 511364 | 867772 | 1226293 | 1583017 | 1926993 | 2272207 | 2682659 |
| 174053 | 511937 | 867874 | 1226392 | 1583974 | 1927020 | 2272213 | 2684801 |
| 174078 | 512111 | 868159 | 1226512 | 1584022 | 1927224 | 2272507 | 2685176 |
| 174875 | 512135 | 868456 | 1227673 | 1584046 | 1927284 | 2272588 | 2685347 |
| 175556 | 512635 | 869087 | 1227724 | 1584049 | 1927686 | 2272624 | 2686010 |
| 176506 | 513181 | 869216 | 1227964 | 1584628 | 1928634 | 2272883 | 2686399 |
| 176551 | 514396 | 869219 | 1228775 | 1585812 | 1928955 | 2273885 | 2686600 |
| 176950 | 514397 | 869492 | 1229150 | 1585935 | 1930488 | 2274381 | 2687901 |
| 177677 | 514452 | 869660 | 1229215 | 1586139 | 1930659 | 2274768 | 2688673 |
| 177887 | 514593 | 871513 | 1229383 | 1586334 | 1931861 | 2275848 | 2688700 |
| 180006 | 514801 | 871516 | 1229653 | 1586646 | 1932140 | 2276175 | 2691672 |
| 180240 | 514802 | 872239 | 1229669 | 1586778 | 1932155 | 2276226 | 2691849 |

|        |        |        |         |         |         |         |         |
|--------|--------|--------|---------|---------|---------|---------|---------|
| 180912 | 514878 | 872269 | 1229670 | 1591513 | 1932274 | 2276931 | 2691960 |
| 182055 | 514886 | 872278 | 1230719 | 1591740 | 1932541 | 2277069 | 2692011 |
| 182217 | 514917 | 872323 | 1232275 | 1591778 | 1932650 | 2277231 | 2692774 |
| 183077 | 515204 | 872708 | 1232683 | 1593101 | 1933184 | 2280649 | 2693092 |
| 183668 | 516294 | 872876 | 1233405 | 1593479 | 1933415 | 2281617 | 2693100 |
| 184455 | 516333 | 873839 | 1234267 | 1593758 | 1933434 | 2281962 | 2695346 |
| 185289 | 516462 | 874122 | 1234621 | 1594072 | 1933435 | 2282348 | 2696019 |
| 185769 | 516829 | 874406 | 1235649 | 1594543 | 1933508 | 2283287 | 2696561 |
| 186841 | 516830 | 874580 | 1236330 | 1594844 | 1933511 | 2284306 | 2698458 |
| 187048 | 517113 | 875047 | 1236924 | 1595563 | 1933577 | 2284345 | 2698546 |
| 187115 | 517149 | 875193 | 1237089 | 1595929 | 1933817 | 2285128 | 2698681 |
| 187210 | 517210 | 875697 | 1237197 | 1595968 | 1934324 | 2285311 | 2698682 |
| 187597 | 517211 | 875912 | 1237209 | 1596325 | 1934345 | 2286350 | 2699314 |
| 187675 | 517317 | 876314 | 1238842 | 1596433 | 1934588 | 2286356 | 2699650 |
| 187780 | 517645 | 876367 | 1239947 | 1596445 | 1935009 | 2286440 | 2700457 |
| 188014 | 517646 | 876551 | 1240362 | 1596902 | 1935010 | 2287154 | 2701504 |
| 189128 | 517689 | 877259 | 1240449 | 1597075 | 1935282 | 2287317 | 2702020 |
| 190334 | 517920 | 878105 | 1240632 | 1597076 | 1935283 | 2287365 | 2702731 |
| 191023 | 518142 | 878339 | 1240941 | 1597437 | 1935638 | 2288408 | 2703097 |
| 191509 | 518487 | 879317 | 1241172 | 1597776 | 1935854 | 2288489 | 2703508 |
| 191861 | 518619 | 879662 | 1241240 | 1598001 | 1935857 | 2288510 | 2704251 |
| 191864 | 518913 | 880063 | 1242257 | 1598184 | 1935938 | 2288540 | 2704284 |
| 192236 | 519090 | 880936 | 1242404 | 1598253 | 1936061 | 2288927 | 2704395 |
| 192485 | 519581 | 881866 | 1242452 | 1598367 | 1936226 | 2289002 | 2704782 |
| 192635 | 520184 | 881962 | 1242769 | 1598596 | 1936525 | 2289011 | 2705280 |
| 192829 | 520343 | 882049 | 1242880 | 1598597 | 1937413 | 2289101 | 2708679 |
| 193061 | 520457 | 882277 | 1243018 | 1598622 | 1938156 | 2290072 | 2708693 |
| 193082 | 520484 | 882295 | 1243567 | 1598709 | 1939314 | 2291369 | 2708740 |
| 193083 | 520622 | 882751 | 1243585 | 1600127 | 1939344 | 2293623 | 2708741 |
| 193183 | 520916 | 882895 | 1243624 | 1600199 | 1939617 | 2293797 | 2709990 |
| 193594 | 521525 | 882922 | 1244272 | 1600561 | 1939921 | 2294616 | 2709999 |
| 193597 | 522242 | 883417 | 1244844 | 1601364 | 1939922 | 2294773 | 2710065 |
| 193669 | 522515 | 883759 | 1245297 | 1601379 | 1940310 | 2295494 | 2710239 |
| 193765 | 523062 | 883855 | 1245333 | 1601517 | 1941000 | 2295906 | 2710359 |
| 193768 | 523431 | 885751 | 1245729 | 1601529 | 1941081 | 2296011 | 2712421 |
| 193876 | 524091 | 886911 | 1246616 | 1601601 | 1941672 | 2296056 | 2713297 |
| 193918 | 524481 | 887226 | 1246718 | 1601653 | 1942108 | 2296885 | 2714800 |
| 194158 | 524850 | 887490 | 1247513 | 1601676 | 1942120 | 2297221 | 2715539 |
| 194395 | 524898 | 887610 | 1248404 | 1601811 | 1943095 | 2297389 | 2715561 |
| 195747 | 525309 | 887718 | 1248626 | 1601877 | 1943389 | 2297794 | 2715606 |
| 196126 | 525528 | 887760 | 1249302 | 1602072 | 1943407 | 2299018 | 2715730 |
| 196127 | 525612 | 888509 | 1249871 | 1602141 | 1943533 | 2299252 | 2715731 |
| 196185 | 526921 | 888608 | 1250482 | 1602177 | 1944223 | 2299789 | 2716227 |

|        |        |        |         |         |         |         |         |
|--------|--------|--------|---------|---------|---------|---------|---------|
| 196975 | 526942 | 888728 | 1250923 | 1602202 | 1944268 | 2300296 | 2716308 |
| 197030 | 527820 | 889142 | 1252021 | 1602203 | 1947090 | 2300434 | 2716347 |
| 197031 | 527892 | 889793 | 1252318 | 1602750 | 1947553 | 2300584 | 2716917 |
| 197038 | 528752 | 889877 | 1252849 | 1602882 | 1949778 | 2301171 | 2717085 |
| 198482 | 529754 | 891807 | 1252921 | 1602924 | 1949779 | 2304238 | 2717339 |
| 199113 | 530180 | 892695 | 1253185 | 1603525 | 1950822 | 2305121 | 2718060 |
| 199506 | 530660 | 892827 | 1253336 | 1603526 | 1951408 | 2305122 | 2718471 |
| 199944 | 531098 | 894115 | 1253337 | 1603921 | 1953221 | 2305271 | 2719692 |
| 200112 | 531795 | 894955 | 1253689 | 1605318 | 1955604 | 2305272 | 2719767 |
| 200367 | 532144 | 896135 | 1253821 | 1605804 | 1955631 | 2306776 | 2719980 |
| 200466 | 532333 | 897779 | 1254806 | 1605834 | 1955728 | 2307950 | 2720104 |
| 200592 | 532636 | 898178 | 1255266 | 1605870 | 1955729 | 2308139 | 2720105 |
| 200721 | 532681 | 898409 | 1255734 | 1606365 | 1955745 | 2308184 | 2721043 |
| 200799 | 533110 | 900616 | 1255828 | 1606428 | 1955847 | 2308271 | 2721529 |
| 201315 | 533696 | 901743 | 1255837 | 1606884 | 1956022 | 2308274 | 2724827 |
| 201405 | 533807 | 902000 | 1256155 | 1607289 | 1956023 | 2308475 | 2726114 |
| 201576 | 534483 | 902899 | 1256287 | 1607394 | 1956931 | 2309046 | 2726261 |
| 202237 | 536407 | 903542 | 1256479 | 1607512 | 1956970 | 2309082 | 2726459 |
| 202242 | 536482 | 903545 | 1256777 | 1608745 | 1957733 | 2309409 | 2727781 |
| 202434 | 536665 | 903791 | 1257416 | 1609249 | 1957901 | 2309988 | 2728411 |
| 202677 | 536668 | 905461 | 1258595 | 1609310 | 1957913 | 2311044 | 2728558 |
| 202965 | 537592 | 905940 | 1259461 | 1610383 | 1958438 | 2312766 | 2728688 |
| 203049 | 537852 | 905941 | 1259788 | 1610502 | 1961108 | 2313006 | 2728689 |
| 203094 | 538491 | 906350 | 1259851 | 1611920 | 1961222 | 2314138 | 2729150 |
| 203442 | 538940 | 908681 | 1260262 | 1613252 | 1961345 | 2315429 | 2729473 |
| 203784 | 540156 | 908807 | 1261429 | 1614282 | 1961528 | 2315430 | 2731172 |
| 203853 | 540461 | 909029 | 1262041 | 1614355 | 1961651 | 2316115 | 2731301 |
| 203883 | 540827 | 909587 | 1262131 | 1614356 | 1963171 | 2316116 | 2731739 |
| 204024 | 541619 | 909669 | 1263174 | 1614372 | 1963190 | 2316261 | 2732638 |
| 204873 | 541739 | 910266 | 1263243 | 1614717 | 1963191 | 2318074 | 2732776 |
| 205065 | 541895 | 910282 | 1263865 | 1615257 | 1964294 | 2318413 | 2732836 |
| 205111 | 542006 | 910283 | 1264187 | 1615398 | 1964331 | 2321161 | 2733133 |
| 205112 | 542060 | 910904 | 1264343 | 1615598 | 1964332 | 2321482 | 2733322 |
| 205167 | 542321 | 911431 | 1264586 | 1615666 | 1964792 | 2323123 | 2733466 |
| 205522 | 542627 | 911495 | 1264862 | 1616244 | 1964984 | 2323324 | 2733472 |
| 205815 | 543155 | 911509 | 1265162 | 1616259 | 1965095 | 2324218 | 2733927 |
| 206142 | 544371 | 911568 | 1265285 | 1618005 | 1965640 | 2324362 | 2734383 |
| 206154 | 544563 | 913989 | 1265429 | 1618450 | 1966584 | 2324779 | 2734761 |
| 206745 | 545921 | 914504 | 1265477 | 1618773 | 1966838 | 2324827 | 2734950 |
| 207497 | 546014 | 914505 | 1266428 | 1619036 | 1966841 | 2324848 | 2735151 |
| 207749 | 546602 | 914608 | 1266740 | 1619252 | 1966859 | 2324929 | 2735301 |
| 207752 | 546606 | 916251 | 1267526 | 1619274 | 1969312 | 2325534 | 2735331 |
| 207815 | 546607 | 916804 | 1267527 | 1619275 | 1969364 | 2326809 | 2735340 |

|        |        |        |         |         |         |         |         |
|--------|--------|--------|---------|---------|---------|---------|---------|
| 207818 | 547769 | 916960 | 1268955 | 1619351 | 1969365 | 2327351 | 2737459 |
| 208112 | 547993 | 917957 | 1269093 | 1619576 | 1971438 | 2327354 | 2737591 |
| 208286 | 548716 | 918035 | 1270302 | 1619714 | 1971525 | 2327879 | 2737711 |
| 208355 | 548977 | 918665 | 1270377 | 1619867 | 1971963 | 2329144 | 2737807 |
| 208574 | 549157 | 920543 | 1270590 | 1620176 | 1971996 | 2329997 | 2738011 |
| 209030 | 549175 | 921219 | 1270601 | 1620886 | 1972008 | 2330078 | 2738203 |
| 209033 | 549199 | 921687 | 1271570 | 1621551 | 1972353 | 2330669 | 2738359 |
| 209273 | 549202 | 921738 | 1271792 | 1623232 | 1973297 | 2330738 | 2738552 |
| 209995 | 549238 | 922835 | 1271825 | 1623449 | 1973354 | 2331344 | 2738553 |
| 210558 | 549335 | 923618 | 1271828 | 1623653 | 1973384 | 2331820 | 2738881 |
| 210690 | 549527 | 924050 | 1271832 | 1624293 | 1973797 | 2331821 | 2739711 |
| 210798 | 549779 | 925321 | 1271833 | 1624580 | 1974266 | 2332120 | 2739769 |
| 213713 | 550201 | 925807 | 1271855 | 1624986 | 1974321 | 2332157 | 2739770 |
| 213749 | 550255 | 926535 | 1272158 | 1625130 | 1974322 | 2332158 | 2739786 |
| 213998 | 550258 | 926831 | 1272249 | 1625131 | 1975421 | 2332162 | 2741063 |
| 214415 | 550486 | 927286 | 1272681 | 1625147 | 1975868 | 2332435 | 2741064 |
| 214619 | 550492 | 927379 | 1272759 | 1625264 | 1975931 | 2332612 | 2744621 |
| 215042 | 550900 | 927385 | 1273239 | 1625267 | 1976453 | 2332906 | 2744663 |
| 215135 | 550954 | 928421 | 1273350 | 1625938 | 1978340 | 2333038 | 2744844 |
| 216198 | 551611 | 928813 | 1273410 | 1626025 | 1978370 | 2333383 | 2744964 |
| 216579 | 551668 | 928816 | 1273455 | 1626192 | 1978728 | 2333605 | 2745372 |
| 216926 | 551887 | 931308 | 1274364 | 1626397 | 1979544 | 2333836 | 2745498 |
| 216928 | 552377 | 931422 | 1274775 | 1626701 | 1979946 | 2333879 | 2748804 |
| 216929 | 552921 | 931452 | 1274799 | 1626702 | 1980018 | 2333880 | 2748805 |
| 217357 | 553053 | 931690 | 1274994 | 1626730 | 1980955 | 2334208 | 2749368 |
| 217498 | 553218 | 931691 | 1275841 | 1626883 | 1981303 | 2334314 | 2749713 |
| 217499 | 554320 | 931844 | 1276435 | 1626921 | 1981771 | 2334315 | 2750568 |
| 217671 | 554419 | 932090 | 1276990 | 1626979 | 1982896 | 2334376 | 2751288 |
| 218040 | 554485 | 932450 | 1277071 | 1627072 | 1983232 | 2334412 | 2751351 |
| 218046 | 555258 | 933561 | 1277701 | 1627297 | 1983301 | 2334695 | 2752247 |
| 218706 | 555295 | 933609 | 1278436 | 1627829 | 1983325 | 2334696 | 2752295 |
| 219129 | 555296 | 933945 | 1278796 | 1628656 | 1983349 | 2335063 | 2752790 |
| 219180 | 555661 | 934165 | 1279869 | 1628657 | 1983795 | 2335192 | 2753041 |
| 219872 | 555841 | 934166 | 1280049 | 1629006 | 1984482 | 2335231 | 2753646 |
| 220007 | 555951 | 934315 | 1280247 | 1630612 | 1984483 | 2336044 | 2753834 |
| 220642 | 557008 | 934316 | 1281266 | 1631378 | 1984670 | 2336113 | 2753858 |
| 220798 | 557155 | 934778 | 1281317 | 1631379 | 1984784 | 2336383 | 2754674 |
| 221317 | 558088 | 935612 | 1281518 | 1631414 | 1985638 | 2336500 | 2754764 |
| 221717 | 559521 | 936089 | 1282055 | 1633165 | 1985639 | 2336557 | 2754944 |
| 221718 | 559697 | 936203 | 1282097 | 1633819 | 1985926 | 2336761 | 2754950 |
| 222043 | 560123 | 936251 | 1282113 | 1633996 | 1985995 | 2336992 | 2755187 |
| 222046 | 560124 | 937264 | 1282114 | 1634008 | 1986884 | 2337818 | 2757402 |
| 222519 | 560179 | 938584 | 1282271 | 1634024 | 1987709 | 2337850 | 2757648 |

|        |        |        |         |         |         |         |         |
|--------|--------|--------|---------|---------|---------|---------|---------|
| 222651 | 560320 | 938689 | 1282517 | 1634308 | 1989480 | 2338649 | 2758614 |
| 223681 | 560528 | 938788 | 1283087 | 1635037 | 1989615 | 2338796 | 2759049 |
| 223969 | 560529 | 939689 | 1284780 | 1636293 | 1990517 | 2339084 | 2759615 |
| 224395 | 560605 | 939848 | 1284840 | 1636294 | 1990518 | 2339087 | 2759847 |
| 224398 | 560613 | 940244 | 1285107 | 1636616 | 1992523 | 2339963 | 2759848 |
| 224809 | 560644 | 940629 | 1285368 | 1637992 | 1994404 | 2340012 | 2760252 |
| 225178 | 560931 | 940630 | 1285713 | 1638046 | 1994681 | 2340072 | 2760860 |
| 225199 | 562056 | 941569 | 1286049 | 1638579 | 1994682 | 2340252 | 2760933 |
| 225619 | 562095 | 941572 | 1287053 | 1638585 | 1997608 | 2341618 | 2760934 |
| 225904 | 562224 | 941581 | 1287100 | 1638609 | 1998446 | 2341619 | 2761022 |
| 227890 | 562591 | 942956 | 1287206 | 1638813 | 1998646 | 2341767 | 2761798 |
| 228139 | 562592 | 943084 | 1287227 | 1639290 | 1998745 | 2342220 | 2761927 |
| 229027 | 562875 | 943237 | 1287311 | 1639788 | 1999412 | 2342427 | 2761975 |
| 229030 | 562911 | 943660 | 1288614 | 1640792 | 2001100 | 2342768 | 2762026 |
| 229192 | 562972 | 943666 | 1288617 | 1640801 | 2001137 | 2343609 | 2762633 |
| 229902 | 562973 | 943927 | 1289566 | 1641068 | 2001138 | 2344014 | 2762948 |
| 229978 | 563079 | 945642 | 1290912 | 1641071 | 2001142 | 2344017 | 2763281 |
| 230535 | 563407 | 945738 | 1291405 | 1641410 | 2001407 | 2344065 | 2763329 |
| 231041 | 563408 | 947632 | 1291645 | 1642016 | 2001594 | 2344290 | 2763867 |
| 231741 | 563451 | 949123 | 1291661 | 1642461 | 2002173 | 2344338 | 2764476 |
| 231742 | 563682 | 949537 | 1291865 | 1644463 | 2003050 | 2344765 | 2765073 |
| 232086 | 563904 | 949540 | 1291866 | 1646138 | 2003182 | 2345101 | 2765554 |
| 232193 | 564249 | 950504 | 1292074 | 1646885 | 2003497 | 2345972 | 2765767 |
| 232755 | 564381 | 950616 | 1292134 | 1647934 | 2003539 | 2346753 | 2766187 |
| 232908 | 564675 | 950967 | 1293080 | 1649247 | 2003638 | 2346754 | 2767041 |
| 233052 | 564852 | 951042 | 1293966 | 1649406 | 2003722 | 2348654 | 2768571 |
| 233133 | 565343 | 952636 | 1293969 | 1649541 | 2004223 | 2349490 | 2768670 |
| 233821 | 565946 | 952777 | 1294968 | 1650177 | 2004642 | 2349673 | 2768856 |
| 233857 | 566105 | 952807 | 1295040 | 1650364 | 2004807 | 2350006 | 2768892 |
| 234262 | 566219 | 953183 | 1295103 | 1650823 | 2004836 | 2350884 | 2768904 |
| 234269 | 566246 | 953184 | 1295193 | 1650877 | 2005008 | 2350941 | 2769129 |
| 234270 | 566384 | 955241 | 1296260 | 1651595 | 2005473 | 2351001 | 2769864 |
| 234316 | 566678 | 955682 | 1296779 | 1652068 | 2005581 | 2351079 | 2771161 |
| 234985 | 567566 | 955709 | 1297451 | 1652805 | 2005716 | 2351226 | 2771879 |
| 235181 | 567725 | 956771 | 1297454 | 1653802 | 2005788 | 2352378 | 2772015 |
| 235182 | 567848 | 957359 | 1297856 | 1653803 | 2007519 | 2352450 | 2772084 |
| 235438 | 567947 | 957495 | 1298750 | 1653843 | 2007863 | 2352786 | 2772318 |
| 235615 | 568559 | 957945 | 1299266 | 1655299 | 2008041 | 2354671 | 2772642 |
| 237106 | 569404 | 957951 | 1300292 | 1655449 | 2009221 | 2354908 | 2774138 |
| 237217 | 569587 | 958284 | 1301735 | 1655452 | 2010261 | 2355154 | 2774531 |
| 237232 | 569800 | 959214 | 1302288 | 1655626 | 2012061 | 2355424 | 2774859 |
| 237298 | 569857 | 959245 | 1302811 | 1655707 | 2012718 | 2355895 | 2774860 |
| 237427 | 569998 | 959329 | 1302853 | 1655793 | 2013752 | 2356048 | 2775093 |



|        |        |        |         |         |         |         |         |
|--------|--------|--------|---------|---------|---------|---------|---------|
| 237577 | 570163 | 959458 | 1302856 | 1655809 | 2014207 | 2356408 | 2775094 |
| 237637 | 570166 | 961342 | 1302982 | 1655863 | 2014372 | 2357104 | 2775221 |
| 238478 | 570429 | 961612 | 1303345 | 1655950 | 2014760 | 2357802 | 2775389 |
| 239300 | 570746 | 961723 | 1303585 | 1655988 | 2014761 | 2358202 | 2775870 |
| 239314 | 570758 | 962495 | 1303894 | 1656080 | 2014876 | 2358891 | 2777658 |
| 239360 | 571984 | 963096 | 1303996 | 1656081 | 2014879 | 2359126 | 2777734 |
| 239882 | 572407 | 963258 | 1305348 | 1656292 | 2015704 | 2359127 | 2777845 |
| 240296 | 572698 | 963912 | 1305387 | 1656409 | 2016304 | 2359143 | 2777854 |
| 240303 | 573092 | 964644 | 1306222 | 1656931 | 2017118 | 2360431 | 2778160 |
| 240356 | 573434 | 964821 | 1306593 | 1657303 | 2017154 | 2360833 | 2778291 |
| 240416 | 574305 | 965175 | 1307061 | 1657657 | 2017478 | 2360881 | 2778318 |
| 240739 | 575790 | 965184 | 1307139 | 1657852 | 2018541 | 2361214 | 2778349 |
| 240938 | 575892 | 966066 | 1307268 | 1659756 | 2019013 | 2361637 | 2778397 |
| 242504 | 575901 | 966720 | 1307376 | 1660235 | 2019016 | 2361715 | 2778925 |
| 243148 | 576882 | 967206 | 1308611 | 1660403 | 2019540 | 2361754 | 2778926 |
| 243202 | 576925 | 967236 | 1308656 | 1661392 | 2020011 | 2361817 | 2779047 |
| 243766 | 576926 | 967819 | 1308713 | 1662073 | 2020710 | 2361994 | 2779242 |
| 244468 | 577305 | 967820 | 1308872 | 1662499 | 2020978 | 2362129 | 2779545 |
| 244481 | 577635 | 967836 | 1309376 | 1662709 | 2021899 | 2362228 | 2779578 |
| 244561 | 577824 | 967923 | 1309607 | 1662712 | 2022136 | 2362435 | 2779910 |
| 245300 | 578055 | 968016 | 1312684 | 1663514 | 2022409 | 2362996 | 2780304 |
| 245301 | 578064 | 968211 | 1313671 | 1663538 | 2023841 | 2363263 | 2780379 |
| 245531 | 580285 | 968371 | 1314343 | 1663874 | 2023916 | 2363314 | 2781647 |
| 245532 | 580288 | 968372 | 1314355 | 1664538 | 2025360 | 2363569 | 2781648 |
| 245746 | 580651 | 968907 | 1314397 | 1664802 | 2025670 | 2364070 | 2781694 |
| 245885 | 580810 | 969141 | 1314568 | 1665231 | 2025886 | 2364406 | 2781850 |
| 245886 | 581050 | 969657 | 1314775 | 1666723 | 2025887 | 2364467 | 2782106 |
| 246670 | 581651 | 969954 | 1314971 | 1667123 | 2026413 | 2364981 | 2782471 |
| 247110 | 582043 | 970224 | 1315172 | 1667195 | 2028101 | 2364982 | 2782621 |
| 247131 | 582247 | 970227 | 1315298 | 1667489 | 2028387 | 2365215 | 2782666 |
| 247449 | 582331 | 970377 | 1315802 | 1668847 | 2028388 | 2365216 | 2783921 |
| 247465 | 582731 | 970431 | 1316411 | 1669066 | 2028591 | 2365579 | 2784136 |
| 247466 | 582942 | 970911 | 1316435 | 1669159 | 2028684 | 2366114 | 2784166 |
| 247639 | 582943 | 972027 | 1316447 | 1669387 | 2028799 | 2366115 | 2785543 |
| 247640 | 583122 | 972291 | 1316570 | 1669663 | 2028909 | 2366251 | 2786283 |
| 247695 | 583123 | 973000 | 1316968 | 1669858 | 2028996 | 2366267 | 2786386 |
| 249105 | 584428 | 973799 | 1317067 | 1670002 | 2029180 | 2366268 | 2786821 |
| 249150 | 584431 | 975074 | 1317607 | 1670773 | 2029181 | 2366462 | 2787184 |
| 249420 | 584887 | 975600 | 1317814 | 1670785 | 2030322 | 2366463 | 2788050 |
| 249444 | 585246 | 975783 | 1318177 | 1670863 | 2030382 | 2367639 | 2788482 |
| 251337 | 585611 | 975870 | 1318263 | 1670893 | 2031373 | 2368163 | 2788907 |
| 251541 | 585677 | 976194 | 1318653 | 1671247 | 2031913 | 2368458 | 2789078 |
| 252612 | 586998 | 977235 | 1318884 | 1671394 | 2033104 | 2368521 | 2789459 |

|        |        |        |         |         |         |         |         |
|--------|--------|--------|---------|---------|---------|---------|---------|
| 253687 | 588261 | 977397 | 1320182 | 1671727 | 2033884 | 2368575 | 2789660 |
| 253842 | 589051 | 978621 | 1320779 | 1675487 | 2034201 | 2368803 | 2790111 |
| 254972 | 589795 | 978625 | 1321138 | 1675488 | 2034251 | 2368977 | 2790112 |
| 254973 | 590194 | 978626 | 1321441 | 1675615 | 2034309 | 2370243 | 2790245 |
| 257575 | 590840 | 978949 | 1321525 | 1675819 | 2034310 | 2372040 | 2790485 |
| 258395 | 591155 | 978950 | 1321936 | 1676044 | 2034438 | 2372041 | 2791037 |
| 258572 | 591337 | 979146 | 1322583 | 1676313 | 2034459 | 2372285 | 2791115 |
| 258881 | 592076 | 979635 | 1322655 | 1676314 | 2034716 | 2373279 | 2791307 |
| 259370 | 592223 | 980022 | 1322985 | 1676477 | 2034893 | 2374198 | 2791646 |
| 259469 | 593612 | 980157 | 1323102 | 1677129 | 2035297 | 2374249 | 2793473 |
| 259481 | 594011 | 980605 | 1323201 | 1677246 | 2035399 | 2374309 | 2794241 |
| 259535 | 594047 | 980680 | 1323294 | 1677381 | 2035587 | 2374312 | 2794244 |
| 261167 | 594832 | 980797 | 1324277 | 1677753 | 2035762 | 2374411 | 2794308 |
| 261329 | 594833 | 981589 | 1324472 | 1677996 | 2036471 | 2374552 | 2794309 |
| 261572 | 595011 | 982519 | 1326209 | 1678023 | 2036648 | 2374663 | 2795077 |
| 261674 | 595995 | 982612 | 1326996 | 1678337 | 2036942 | 2374753 | 2795098 |
| 262117 | 596757 | 983474 | 1327488 | 1678355 | 2037074 | 2376271 | 2795269 |
| 262288 | 597303 | 984187 | 1327887 | 1678403 | 2037419 | 2376272 | 2795584 |
| 262657 | 597432 | 984904 | 1328868 | 1679476 | 2037641 | 2377241 | 2795889 |
| 263137 | 597495 | 985279 | 1328970 | 1679599 | 2037872 | 2378254 | 2797370 |
| 263165 | 597576 | 986046 | 1330544 | 1679734 | 2037915 | 2378392 | 2797430 |
| 263434 | 598122 | 986539 | 1330934 | 1680725 | 2037916 | 2378521 | 2798771 |
| 263758 | 598312 | 986540 | 1331174 | 1681943 | 2038244 | 2378980 | 2799215 |
| 263875 | 599003 | 987233 | 1331621 | 1682201 | 2038350 | 2379577 | 2800627 |
| 263896 | 599847 | 988191 | 1333659 | 1682369 | 2038351 | 2379712 | 2800630 |
| 265166 | 599865 | 988192 | 1333742 | 1682483 | 2038412 | 2381815 | 2800774 |
| 265180 | 600045 | 988716 | 1334304 | 1682968 | 2038448 | 2381884 | 2801315 |
| 265921 | 600061 | 989320 | 1334784 | 1683903 | 2038731 | 2382067 | 2803980 |
| 266626 | 600066 | 989359 | 1336923 | 1684086 | 2038732 | 2382214 | 2804511 |
| 266941 | 601041 | 989407 | 1337403 | 1685266 | 2039099 | 2382301 | 2805217 |
| 267154 | 601197 | 989875 | 1337735 | 1685344 | 2039228 | 2383066 | 2805981 |
| 267728 | 602871 | 990354 | 1337738 | 1685347 | 2039267 | 2383447 | 2806032 |
| 267822 | 603891 | 990429 | 1337954 | 1685554 | 2039849 | 2386121 | 2806290 |
| 267823 | 603951 | 990660 | 1339541 | 1685812 | 2040029 | 2386739 | 2806395 |
| 267926 | 604209 | 990885 | 1339583 | 1686139 | 2040095 | 2387282 | 2807036 |
| 268022 | 605724 | 992801 | 1339691 | 1686608 | 2040408 | 2387504 | 2807037 |
| 269272 | 606432 | 993115 | 1339718 | 1686992 | 2040695 | 2388950 | 2807855 |
| 269485 | 606433 | 993292 | 1339928 | 1687031 | 2040726 | 2388953 | 2807856 |
| 269524 | 606606 | 993565 | 1340071 | 1687121 | 2040734 | 2388959 | 2808128 |
| 269582 | 606791 | 994615 | 1340177 | 1687526 | 2040810 | 2388983 | 2808129 |
| 269752 | 606794 | 994676 | 1340210 | 1687954 | 2040811 | 2389681 | 2808586 |
| 270733 | 606984 | 995030 | 1340213 | 1689436 | 2041019 | 2389682 | 2809641 |
| 271870 | 606985 | 995459 | 1340231 | 1689662 | 2041160 | 2391039 | 2810151 |

|        |        |         |         |         |         |         |         |
|--------|--------|---------|---------|---------|---------|---------|---------|
| 272581 | 607809 | 995762  | 1340414 | 1689939 | 2041215 | 2391372 | 2810466 |
| 273553 | 608211 | 995900  | 1340477 | 1690122 | 2041216 | 2392222 | 2810843 |
| 273554 | 608217 | 995921  | 1340633 | 1690950 | 2042178 | 2392360 | 2811252 |
| 274353 | 608406 | 996597  | 1340684 | 1691191 | 2043216 | 2392501 | 2811838 |
| 274704 | 608511 | 996884  | 1340780 | 1691737 | 2043776 | 2392660 | 2812766 |
| 274765 | 608580 | 997319  | 1341282 | 1691740 | 2044403 | 2393263 | 2812767 |
| 274766 | 608589 | 998807  | 1341912 | 1691821 | 2045030 | 2393726 | 2813071 |
| 274998 | 608925 | 999432  | 1343445 | 1692412 | 2045057 | 2395886 | 2814177 |
| 275835 | 609570 | 999531  | 1343446 | 1692855 | 2045162 | 2396700 | 2814901 |
| 276222 | 610642 | 999666  | 1344574 | 1693406 | 2045282 | 2397130 | 2816655 |
| 277201 | 611113 | 1001764 | 1344577 | 1694092 | 2045376 | 2397217 | 2817400 |
| 277313 | 611981 | 1002115 | 1344607 | 1694369 | 2046250 | 2397367 | 2817698 |
| 277314 | 612017 | 1002806 | 1344811 | 1695113 | 2046251 | 2397637 | 2817699 |
| 277414 | 612305 | 1002819 | 1345489 | 1695595 | 2047353 | 2397646 | 2818639 |
| 277792 | 614132 | 1003094 | 1345561 | 1696057 | 2047584 | 2397790 | 2819338 |
| 278113 | 614133 | 1004417 | 1345606 | 1696684 | 2047857 | 2397874 | 2820475 |
| 278143 | 614637 | 1004426 | 1346015 | 1696902 | 2048193 | 2397883 | 2820652 |
| 278152 | 614970 | 1005446 | 1346498 | 1697232 | 2048344 | 2398018 | 2820703 |
| 279665 | 615405 | 1005740 | 1346615 | 1697565 | 2048345 | 2398094 | 2821051 |
| 280257 | 615568 | 1006312 | 1347278 | 1697607 | 2048529 | 2398095 | 2821318 |
| 280542 | 616835 | 1007587 | 1347416 | 1697646 | 2049097 | 2398135 | 2821336 |
| 280983 | 617132 | 1008437 | 1348349 | 1698027 | 2049560 | 2398719 | 2821801 |
| 281199 | 617270 | 1009123 | 1349081 | 1698114 | 2049983 | 2400262 | 2822230 |
| 281319 | 617882 | 1009124 | 1349241 | 1698189 | 2049984 | 2401892 | 2822260 |
| 282105 | 617939 | 1009371 | 1349242 | 1698237 | 2050336 | 2402764 | 2822419 |
| 282602 | 618041 | 1009437 | 1349645 | 1698375 | 2050405 | 2403598 | 2823077 |
| 282720 | 618272 | 1010191 | 1349943 | 1698387 | 2050618 | 2404042 | 2824941 |
| 283315 | 619733 | 1010524 | 1349944 | 1699134 | 2050687 | 2404648 | 2826549 |
| 283655 | 620396 | 1010737 | 1350302 | 1700105 | 2050774 | 2404884 | 2826741 |
| 283656 | 621740 | 1010764 | 1350909 | 1701181 | 2050845 | 2404994 | 2827209 |
| 284203 | 622070 | 1010884 | 1351534 | 1702089 | 2050891 | 2404995 | 2827212 |
| 285033 | 623526 | 1011013 | 1351535 | 1702794 | 2051151 | 2405146 | 2827566 |
| 285276 | 624126 | 1011193 | 1351665 | 1703757 | 2051311 | 2405176 | 2827569 |
| 285363 | 624168 | 1011196 | 1352037 | 1703985 | 2051312 | 2405236 | 2827800 |
| 285393 | 624372 | 1011846 | 1352262 | 1704464 | 2051375 | 2405293 | 2827839 |
| 285474 | 624417 | 1012846 | 1352962 | 1704644 | 2051380 | 2406044 | 2827932 |
| 285819 | 624769 | 1013325 | 1353355 | 1704821 | 2051467 | 2406320 | 2828028 |
| 285852 | 624772 | 1014010 | 1353731 | 1704935 | 2051468 | 2407213 | 2828404 |
| 285879 | 625054 | 1014137 | 1353732 | 1705969 | 2052028 | 2409546 | 2828848 |
| 286098 | 625534 | 1014140 | 1354604 | 1705981 | 2052029 | 2409547 | 2829037 |
| 286254 | 627141 | 1015492 | 1354607 | 1706582 | 2052544 | 2409548 | 2829073 |
| 288126 | 627876 | 1015549 | 1354742 | 1706588 | 2054055 | 2409753 | 2829175 |
| 288354 | 628267 | 1016591 | 1354754 | 1706771 | 2054328 | 2409846 | 2829553 |

|        |        |         |         |         |         |         |         |
|--------|--------|---------|---------|---------|---------|---------|---------|
| 288511 | 628739 | 1016810 | 1354874 | 1707182 | 2054562 | 2410458 | 2829938 |
| 288512 | 629045 | 1016885 | 1354877 | 1708269 | 2055258 | 2410627 | 2830373 |
| 288801 | 629192 | 1017507 | 1356375 | 1708308 | 2055270 | 2410639 | 2830742 |
| 288966 | 629706 | 1018721 | 1356402 | 1708641 | 2055426 | 2410792 | 2830874 |
| 289305 | 630304 | 1019488 | 1358135 | 1709115 | 2056337 | 2410795 | 2831635 |
| 289551 | 630316 | 1020799 | 1358525 | 1709526 | 2056586 | 2411721 | 2831800 |
| 289944 | 631022 | 1020823 | 1358795 | 1710241 | 2057238 | 2411993 | 2832070 |
| 290172 | 631268 | 1022501 | 1359086 | 1710571 | 2057913 | 2411994 | 2832226 |
| 292000 | 631271 | 1022729 | 1359299 | 1710574 | 2058497 | 2412010 | 2832841 |
| 292001 | 631350 | 1023482 | 1359482 | 1710742 | 2059970 | 2413922 | 2832852 |
| 292134 | 632280 | 1023483 | 1361982 | 1711290 | 2060764 | 2414156 | 2833222 |
| 292239 | 632328 | 1023542 | 1362355 | 1711837 | 2061564 | 2414735 | 2833937 |
| 293537 | 632499 | 1023543 | 1362356 | 1712690 | 2061570 | 2415220 | 2834105 |
| 293991 | 633124 | 1024795 | 1362855 | 1712942 | 2063359 | 2416262 | 2834546 |
| 294863 | 633125 | 1024940 | 1362900 | 1713269 | 2063920 | 2416263 | 2834862 |
| 294963 | 633313 | 1024941 | 1363748 | 1713626 | 2065052 | 2417607 | 2834988 |
| 295803 | 633314 | 1025197 | 1363940 | 1714550 | 2065436 | 2417703 | 2835000 |
| 296031 | 633316 | 1025398 | 1364246 | 1714577 | 2065676 | 2417865 | 2835345 |
| 296825 | 633755 | 1026103 | 1367463 | 1715111 | 2066107 | 2418147 | 2835364 |
| 297455 | 634153 | 1026179 | 1368148 | 1715267 | 2066209 | 2419254 | 2835408 |
| 297924 | 634600 | 1026180 | 1370785 | 1715729 | 2066220 | 2419554 | 2835528 |
| 297925 | 634921 | 1027060 | 1371219 | 1715906 | 2066432 | 2420382 | 2835828 |
| 298680 | 635561 | 1027770 | 1371254 | 1716401 | 2067912 | 2420383 | 2835957 |
| 299617 | 636236 | 1027771 | 1371255 | 1716485 | 2067963 | 2420603 | 2837611 |
| 300055 | 636693 | 1028538 | 1371394 | 1717027 | 2068347 | 2420789 | 2837695 |
| 300472 | 636714 | 1030011 | 1373010 | 1718048 | 2068348 | 2421029 | 2837702 |
| 300772 | 636839 | 1030428 | 1373045 | 1720133 | 2068390 | 2421077 | 2837900 |
| 300967 | 637365 | 1031455 | 1373046 | 1720739 | 2071406 | 2421999 | 2839135 |
| 301434 | 637368 | 1031461 | 1373943 | 1720937 | 2071703 | 2422096 | 2841337 |
| 301641 | 638128 | 1031771 | 1373978 | 1721477 | 2072147 | 2422097 | 2841643 |
| 301644 | 638131 | 1031772 | 1373979 | 1721480 | 2072462 | 2422224 | 2842285 |
| 303017 | 638233 | 1031884 | 1374267 | 1721655 | 2073882 | 2422308 | 2842780 |
| 303933 | 638311 | 1032006 | 1375848 | 1721656 | 2074026 | 2423783 | 2842831 |
| 304053 | 638662 | 1032103 | 1375849 | 1721759 | 2074146 | 2425002 | 2843653 |
| 304101 | 639098 | 1033171 | 1377067 | 1722096 | 2076624 | 2425494 | 2844181 |
| 304225 | 639239 | 1033186 | 1377253 | 1722684 | 2076960 | 2425680 | 2844236 |
| 304530 | 639246 | 1033243 | 1377649 | 1722864 | 2077167 | 2425830 | 2844307 |
| 304773 | 639247 | 1033315 | 1377673 | 1723428 | 2077311 | 2426067 | 2846662 |
| 305106 | 640367 | 1033828 | 1378998 | 1723431 | 2077455 | 2426394 | 2847394 |
| 305242 | 641099 | 1034431 | 1379220 | 1723593 | 2077961 | 2427121 | 2847397 |
| 305536 | 641426 | 1035562 | 1379252 | 1723908 | 2079408 | 2427315 | 2847846 |
| 305537 | 642787 | 1035946 | 1380182 | 1723929 | 2079806 | 2427601 | 2848872 |
| 306359 | 643261 | 1035973 | 1380647 | 1724358 | 2080271 | 2427602 | 2848977 |

|        |        |         |         |         |         |         |         |
|--------|--------|---------|---------|---------|---------|---------|---------|
| 306464 | 644069 | 1036139 | 1380716 | 1724361 | 2080730 | 2428027 | 2849055 |
| 306563 | 644709 | 1036140 | 1381194 | 1724862 | 2081939 | 2428776 | 2851433 |
| 306686 | 646054 | 1036829 | 1382064 | 1725054 | 2082296 | 2428995 | 2852431 |
| 307025 | 646387 | 1037232 | 1382478 | 1725222 | 2083180 | 2429406 | 2852860 |
| 307109 | 646664 | 1037233 | 1382490 | 1725720 | 2084281 | 2429409 | 2853927 |
| 307400 | 647759 | 1037316 | 1382544 | 1726169 | 2084351 | 2429559 | 2853928 |
| 307535 | 648068 | 1037317 | 1382657 | 1726235 | 2084352 | 2429706 | 2854796 |
| 307703 | 648618 | 1037318 | 1382684 | 1726391 | 2084510 | 2431003 | 2855771 |
| 307716 | 648798 | 1038845 | 1383114 | 1726700 | 2084511 | 2431528 | 2855772 |
| 307717 | 649248 | 1038846 | 1383642 | 1726893 | 2084944 | 2431561 | 2856013 |
| 308540 | 649470 | 1039078 | 1383729 | 1727953 | 2085319 | 2432121 | 2856492 |
| 309029 | 649716 | 1039702 | 1384083 | 1728490 | 2085466 | 2432163 | 2856630 |
| 309092 | 649806 | 1039750 | 1385485 | 1728679 | 2085673 | 2432700 | 2856726 |
| 309854 | 649875 | 1039777 | 1385826 | 1728724 | 2086678 | 2435254 | 2856924 |
| 309870 | 650313 | 1042154 | 1388155 | 1729572 | 2086720 | 2435434 | 2857404 |
| 309987 | 650603 | 1043265 | 1388311 | 1730046 | 2087104 | 2435605 | 2857464 |
| 310263 | 650828 | 1043302 | 1388455 | 1730211 | 2087128 | 2435662 | 2857467 |
| 311443 | 650831 | 1043303 | 1389279 | 1730334 | 2087608 | 2435687 | 2857506 |
| 311722 | 652111 | 1043307 | 1389552 | 1730658 | 2088247 | 2435937 | 2857518 |
| 312171 | 653297 | 1043742 | 1389831 | 1731213 | 2089117 | 2437292 | 2859022 |
| 312232 | 653420 | 1045141 | 1390333 | 1732178 | 2089441 | 2438420 | 2859034 |
| 312233 | 653666 | 1045204 | 1391398 | 1732199 | 2089690 | 2439352 | 2859490 |
| 312318 | 653777 | 1045384 | 1391596 | 1733918 | 2089954 | 2440053 | 2859577 |
| 312357 | 653804 | 1047991 | 1392851 | 1733919 | 2090295 | 2440459 | 2859750 |
| 313245 | 653820 | 1049157 | 1392872 | 1733960 | 2090298 | 2440826 | 2859921 |
| 313353 | 653821 | 1049972 | 1393472 | 1733961 | 2090331 | 2440877 | 2859924 |
| 313596 | 653837 | 1050310 | 1393659 | 1734184 | 2091359 | 2440939 | 2860059 |
| 313665 | 654491 | 1052743 | 1393755 | 1734412 | 2091619 | 2441987 | 2860131 |
| 313737 | 654651 | 1052967 | 1393756 | 1734727 | 2092541 | 2442101 | 2860338 |
| 314753 | 654652 | 1053031 | 1393931 | 1734982 | 2093734 | 2444771 | 2860427 |
| 315726 | 654938 | 1053143 | 1394255 | 1735451 | 2094310 | 2444833 | 2861127 |
| 315889 | 655353 | 1053144 | 1395032 | 1735463 | 2094430 | 2448859 | 2861139 |
| 315890 | 657379 | 1053241 | 1395272 | 1735625 | 2094433 | 2449756 | 2861199 |
| 316299 | 657502 | 1054847 | 1395317 | 1737081 | 2095466 | 2451740 | 2861327 |
| 316729 | 657559 | 1055102 | 1397627 | 1737177 | 2095496 | 2452688 | 2862384 |
| 316730 | 657664 | 1055273 | 1398452 | 1737440 | 2095502 | 2453264 | 2863074 |
| 316761 | 657799 | 1055804 | 1398692 | 1737668 | 2095544 | 2453534 | 2863989 |
| 316857 | 658821 | 1056799 | 1399463 | 1737974 | 2095556 | 2453795 | 2864208 |
| 316980 | 658842 | 1056884 | 1399853 | 1738248 | 2095695 | 2453823 | 2864409 |
| 317601 | 659496 | 1056885 | 1400485 | 1738251 | 2095851 | 2455023 | 2864530 |
| 318058 | 659874 | 1057686 | 1400900 | 1738317 | 2096702 | 2459487 | 2864923 |
| 318310 | 660120 | 1058751 | 1401040 | 1738381 | 2096822 | 2460144 | 2865186 |
| 318520 | 660507 | 1059017 | 1401986 | 1738958 | 2096825 | 2460201 | 2865369 |

|        |        |         |         |         |         |         |         |
|--------|--------|---------|---------|---------|---------|---------|---------|
| 318760 | 660747 | 1059018 | 1403697 | 1739603 | 2096885 | 2460342 | 2865372 |
| 318814 | 661350 | 1059907 | 1404738 | 1740183 | 2096924 | 2461540 | 2865819 |
| 318978 | 661546 | 1060156 | 1404840 | 1741134 | 2097125 | 2461588 | 2866473 |
| 319389 | 661547 | 1061054 | 1405785 | 1741501 | 2099206 | 2462332 | 2867541 |
| 320697 | 662172 | 1061102 | 1406061 | 1741774 | 2099284 | 2462665 | 2867817 |
| 320809 | 662335 | 1061186 | 1406064 | 1741852 | 2099598 | 2462713 | 2868052 |
| 320810 | 662336 | 1061550 | 1406724 | 1743344 | 2099839 | 2462843 | 2868325 |
| 320860 | 662571 | 1061745 | 1407324 | 1744824 | 2099848 | 2462844 | 2868856 |
| 320861 | 663470 | 1061862 | 1407672 | 1744980 | 2099870 | 2462984 | 2869446 |
| 321411 | 663725 | 1062024 | 1407810 | 1746300 | 2099871 | 2462985 | 2869488 |
| 322102 | 664021 | 1062441 | 1407828 | 1747028 | 2100023 | 2463051 | 2870118 |
| 323826 | 664876 | 1063066 | 1407975 | 1747187 | 2100230 | 2463310 | 2870142 |
| 324797 | 664885 | 1063219 | 1408353 | 1747265 | 2100707 | 2463488 | 2870148 |
| 325016 | 665125 | 1063708 | 1408647 | 1747502 | 2101126 | 2464045 | 2871698 |
| 325299 | 666884 | 1063747 | 1408785 | 1747795 | 2101390 | 2464477 | 2871893 |
| 325338 | 668584 | 1064447 | 1408812 | 1748203 | 2101496 | 2465189 | 2871915 |
| 325515 | 668600 | 1064448 | 1408926 | 1748230 | 2101714 | 2465453 | 2873907 |
| 325956 | 668602 | 1064500 | 1409085 | 1748500 | 2101876 | 2465456 | 2874511 |
| 326331 | 668656 | 1064569 | 1409688 | 1748773 | 2102266 | 2465977 | 2877261 |
| 326985 | 669175 | 1064629 | 1410650 | 1748857 | 2102396 | 2466476 | 2878383 |
| 327039 | 669232 | 1064665 | 1410651 | 1748995 | 2102397 | 2471125 | 2879028 |
| 327477 | 669358 | 1064803 | 1411451 | 1749891 | 2102410 | 2471126 | 2879328 |
| 327900 | 669972 | 1066098 | 1411452 | 1749987 | 2102869 | 2471475 | 2879442 |
| 329631 | 669973 | 1067267 | 1412008 | 1750062 | 2103239 | 2471622 | 2880870 |
| 329739 | 670091 | 1067334 | 1412923 | 1750212 | 2103240 | 2471887 | 2881480 |
| 330468 | 671434 | 1067335 | 1413190 | 1750503 | 2103802 | 2471967 | 2881481 |
| 331785 | 671653 | 1067631 | 1413535 | 1750563 | 2104616 | 2472142 | 2882983 |
| 332826 | 671707 | 1067632 | 1414447 | 1751047 | 2104730 | 2472143 | 2883514 |
| 332976 | 672082 | 1067885 | 1415305 | 1751257 | 2104935 | 2472210 | 2889558 |
| 333204 | 672442 | 1068297 | 1416013 | 1752353 | 2105694 | 2473727 | 2892299 |
| 333498 | 676279 | 1068608 | 1418195 | 1752955 | 2106119 | 2474097 | 2892313 |
| 333975 | 676480 | 1069247 | 1418783 | 1752976 | 2106120 | 2474356 | 2892430 |
| 334164 | 676672 | 1069400 | 1419419 | 1753297 | 2107028 | 2474513 | 2892442 |
| 334275 | 677394 | 1069547 | 1419461 | 1753429 | 2107031 | 2474914 | 2893688 |
| 334350 | 677623 | 1069859 | 1419491 | 1754076 | 2107103 | 2475987 | 2893708 |
| 334620 | 678238 | 1070381 | 1419638 | 1754106 | 2107199 | 2476331 | 2894854 |
| 334697 | 678272 | 1070496 | 1419737 | 1754619 | 2108436 | 2476992 | 2894937 |
| 334835 | 678273 | 1070497 | 1419976 | 1754650 | 2110320 | 2477146 | 2895075 |
| 336384 | 678379 | 1071035 | 1420037 | 1754651 | 2110386 | 2477151 | 2895147 |
| 336750 | 678643 | 1071488 | 1420038 | 1754859 | 2110458 | 2478624 | 2896485 |
| 337829 | 678895 | 1071601 | 1422734 | 1755083 | 2113569 | 2478828 | 2896818 |
| 338939 | 678898 | 1072256 | 1422735 | 1755101 | 2113635 | 2479447 | 2896848 |
| 339014 | 680750 | 1072364 | 1422937 | 1755320 | 2113982 | 2481924 | 2898356 |

|        |        |         |         |         |         |         |         |
|--------|--------|---------|---------|---------|---------|---------|---------|
| 339171 | 680906 | 1073110 | 1423138 | 1756296 | 2114279 | 2481990 | 2898419 |
| 339388 | 681032 | 1073394 | 1423225 | 1756656 | 2114546 | 2482017 | 2898584 |
| 342929 | 683264 | 1075775 | 1423759 | 1756842 | 2114920 | 2482410 | 2898803 |
| 345116 | 684548 | 1075850 | 1424435 | 1757114 | 2115253 | 2482494 | 2899067 |
| 345567 | 685565 | 1075910 | 1426495 | 1757324 | 2116037 | 2482716 | 2899106 |
| 345568 | 688077 | 1076366 | 1428898 | 1758029 | 2116774 | 2483060 | 2899559 |
| 345815 | 688311 | 1077486 | 1428940 | 1758107 | 2116775 | 2483213 | 2900525 |
| 345905 | 689665 | 1077566 | 1430023 | 1760639 | 2117013 | 2483219 | 2901266 |
| 346642 | 689899 | 1078268 | 1430240 | 1761002 | 2117402 | 2483630 | 2902102 |
| 346663 | 690019 | 1078269 | 1430241 | 1761029 | 2119348 | 2483780 |         |

**Table S2.** The possible editable stop sites in the Newman strain.

|       |        |        |         |         |         |         |         |
|-------|--------|--------|---------|---------|---------|---------|---------|
| 671   | 346921 | 695172 | 1077162 | 1440449 | 1795121 | 2149787 | 2502865 |
| 672   | 347272 | 695701 | 1077806 | 1440985 | 1795406 | 2151608 | 2503097 |
| 1180  | 348052 | 695751 | 1077972 | 1441276 | 1796778 | 2152013 | 2503349 |
| 2472  | 348410 | 695776 | 1078655 | 1441913 | 1797012 | 2153008 | 2503523 |
| 2850  | 348607 | 695813 | 1078725 | 1441946 | 1797066 | 2153596 | 2504030 |
| 3692  | 348814 | 695814 | 1078726 | 1442123 | 1797832 | 2154097 | 2504414 |
| 3728  | 349153 | 695821 | 1078844 | 1442180 | 1797934 | 2154771 | 2508704 |
| 4312  | 349252 | 696560 | 1079277 | 1442183 | 1798369 | 2154969 | 2512795 |
| 4420  | 349540 | 696561 | 1079335 | 1442207 | 1798646 | 2156137 | 2514196 |
| 4675  | 350535 | 698507 | 1079336 | 1442567 | 1798647 | 2156198 | 2514433 |
| 4756  | 350661 | 698510 | 1079709 | 1442823 | 1799462 | 2156201 | 2515098 |
| 4777  | 351132 | 699035 | 1079717 | 1443438 | 1799759 | 2156324 | 2515099 |
| 5092  | 351154 | 699577 | 1079760 | 1444261 | 1800291 | 2156366 | 2515352 |
| 5491  | 351871 | 699751 | 1081001 | 1446066 | 1800330 | 2156531 | 2515583 |
| 6076  | 352192 | 699862 | 1082625 | 1446507 | 1800930 | 2156666 | 2515703 |
| 6169  | 352651 | 700102 | 1082646 | 1446508 | 1800987 | 2156897 | 2517038 |
| 6478  | 352849 | 700350 | 1084471 | 1446510 | 1801335 | 2157402 | 2517489 |
| 6775  | 354061 | 700809 | 1084762 | 1446511 | 1801769 | 2157492 | 2517594 |
| 7177  | 354220 | 701019 | 1086458 | 1446882 | 1802093 | 2157702 | 2517756 |
| 8593  | 354733 | 701918 | 1086737 | 1447497 | 1802210 | 2158017 | 2518786 |
| 8617  | 354749 | 701996 | 1086767 | 1447894 | 1802264 | 2158463 | 2519812 |
| 8989  | 355518 | 702667 | 1086896 | 1448260 | 1802636 | 2159182 | 2520443 |
| 9415  | 355944 | 702892 | 1087055 | 1450477 | 1802678 | 2160150 | 2520803 |
| 9514  | 356232 | 704681 | 1087095 | 1450582 | 1802681 | 2160339 | 2521094 |
| 11305 | 356454 | 704759 | 1087169 | 1451721 | 1803387 | 2161626 | 2521559 |
| 11440 | 357398 | 705135 | 1087418 | 1452249 | 1803795 | 2162470 | 2521615 |
| 11491 | 357464 | 705136 | 1087781 | 1452387 | 1804887 | 2162776 | 2522029 |
| 11638 | 358077 | 706271 | 1088009 | 1454314 | 1805844 | 2163073 | 2522307 |
| 12241 | 358140 | 707523 | 1088048 | 1454741 | 1806351 | 2163334 | 2522999 |
| 13630 | 358153 | 708036 | 1088051 | 1454873 | 1807494 | 2163511 | 2523178 |
| 13663 | 358154 | 708976 | 1088207 | 1455248 | 1807681 | 2163514 | 2523179 |
| 15517 | 358162 | 709234 | 1088312 | 1456070 | 1807682 | 2163901 | 2523302 |
| 15542 | 358222 | 709265 | 1088414 | 1456175 | 1808436 | 2165717 | 2523639 |
| 15598 | 358518 | 709316 | 1088417 | 1456301 | 1808460 | 2166612 | 2523753 |
| 15601 | 358557 | 709532 | 1088486 | 1456742 | 1808565 | 2166615 | 2523933 |
| 16299 | 359188 | 709631 | 1088870 | 1456934 | 1810031 | 2166639 | 2524077 |
| 16452 | 359271 | 710652 | 1088897 | 1456970 | 1810032 | 2166678 | 2524332 |
| 16629 | 359733 | 710868 | 1089397 | 1457312 | 1811273 | 2166855 | 2524687 |
| 16932 | 360354 | 710880 | 1089526 | 1457344 | 1811423 | 2166927 | 2524688 |
| 17523 | 360451 | 710979 | 1090519 | 1457345 | 1811481 | 2167591 | 2524723 |
| 17524 | 360452 | 711248 | 1090522 | 1457646 | 1811690 | 2167687 | 2524724 |
| 17843 | 360892 | 711953 | 1090546 | 1458114 | 1812293 | 2167995 | 2524806 |



|       |        |        |         |         |         |         |         |
|-------|--------|--------|---------|---------|---------|---------|---------|
| 18490 | 360893 | 712647 | 1090580 | 1459038 | 1812854 | 2168034 | 2524968 |
| 19096 | 361476 | 713637 | 1090964 | 1459116 | 1813271 | 2168082 | 2524977 |
| 20307 | 361790 | 714625 | 1090965 | 1459392 | 1813313 | 2168145 | 2525940 |
| 20983 | 362069 | 715780 | 1091756 | 1459620 | 1813562 | 2168148 | 2526036 |
| 21688 | 362447 | 716146 | 1092684 | 1460353 | 1814977 | 2171561 | 2526764 |
| 21736 | 363770 | 717063 | 1092732 | 1463211 | 1815277 | 2172362 | 2526854 |
| 22027 | 363937 | 717146 | 1093620 | 1463785 | 1816996 | 2172425 | 2527226 |
| 22072 | 363938 | 717227 | 1094044 | 1464046 | 1817146 | 2172473 | 2527331 |
| 22369 | 364809 | 717422 | 1094452 | 1464085 | 1817305 | 2173138 | 2527484 |
| 22472 | 365472 | 717452 | 1094958 | 1464241 | 1817695 | 2173349 | 2527628 |
| 22946 | 365668 | 717536 | 1094961 | 1465039 | 1817764 | 2173427 | 2527694 |
| 23367 | 365682 | 718119 | 1095541 | 1465040 | 1819233 | 2173541 | 2527937 |
| 23368 | 366087 | 718122 | 1095794 | 1465056 | 1819242 | 2173784 | 2528864 |
| 23724 | 366117 | 719754 | 1097466 | 1465785 | 1819881 | 2173910 | 2528915 |
| 23725 | 366219 | 719877 | 1097989 | 1466427 | 1820048 | 2174261 | 2529027 |
| 25298 | 366839 | 720813 | 1098313 | 1467515 | 1820096 | 2174461 | 2529028 |
| 25619 | 366935 | 722296 | 1098379 | 1467784 | 1820231 | 2174548 | 2529404 |
| 26012 | 367568 | 722958 | 1098472 | 1467946 | 1820510 | 2174827 | 2529601 |
| 26189 | 367943 | 723168 | 1099197 | 1468409 | 1820711 | 2175112 | 2529604 |
| 26324 | 367973 | 726160 | 1099403 | 1468558 | 1821134 | 2175436 | 2529838 |
| 26918 | 368519 | 726235 | 1099666 | 1468681 | 1821218 | 2175520 | 2529841 |
| 26948 | 368522 | 726523 | 1099667 | 1468684 | 1821308 | 2175553 | 2530078 |
| 28446 | 368855 | 726856 | 1099887 | 1469327 | 1821623 | 2175619 | 2531329 |
| 28494 | 370021 | 726982 | 1100898 | 1469462 | 1822712 | 2176863 | 2531330 |
| 31072 | 370087 | 727020 | 1101399 | 1469651 | 1822787 | 2176923 | 2531958 |
| 31156 | 370126 | 727579 | 1102587 | 1470051 | 1824352 | 2176960 | 2532587 |
| 31483 | 370477 | 727609 | 1102779 | 1470986 | 1825187 | 2177263 | 2532590 |
| 31699 | 371202 | 728555 | 1102896 | 1471148 | 1825773 | 2178400 | 2535219 |
| 31900 | 371334 | 728864 | 1103139 | 1471181 | 1825974 | 2178470 | 2535503 |
| 31997 | 371874 | 729110 | 1103476 | 1472659 | 1826403 | 2178724 | 2536465 |
| 32542 | 371898 | 729926 | 1104002 | 1472675 | 1826577 | 2179047 | 2536666 |
| 32926 | 372667 | 730011 | 1104986 | 1472843 | 1827981 | 2179251 | 2536777 |
| 32977 | 373429 | 730860 | 1105722 | 1472987 | 1828900 | 2180638 | 2537461 |
| 33217 | 374248 | 730911 | 1105734 | 1473053 | 1829308 | 2180815 | 2537542 |
| 33851 | 374426 | 730939 | 1106124 | 1473107 | 1829406 | 2181109 | 2537941 |
| 33971 | 374429 | 731035 | 1106399 | 1473317 | 1829523 | 2181241 | 2538074 |
| 35250 | 374660 | 731188 | 1106891 | 1473473 | 1829922 | 2181586 | 2538075 |
| 35799 | 374669 | 732591 | 1106942 | 1474423 | 1830117 | 2181808 | 2538172 |
| 36336 | 374726 | 732615 | 1107537 | 1475253 | 1831102 | 2182039 | 2539911 |
| 37268 | 374840 | 732913 | 1107538 | 1475724 | 1831103 | 2182082 | 2540961 |
| 37737 | 374843 | 733000 | 1107895 | 1475941 | 1831278 | 2182083 | 2541777 |
| 38192 | 375018 | 733356 | 1108339 | 1476244 | 1832202 | 2182411 | 2541837 |
| 38728 | 375019 | 733467 | 1108794 | 1476802 | 1832653 | 2182517 | 2541933 |

|       |        |        |         |         |         |         |         |
|-------|--------|--------|---------|---------|---------|---------|---------|
| 38861 | 375119 | 733533 | 1108854 | 1476985 | 1832654 | 2182518 | 2542767 |
| 39505 | 375293 | 734382 | 1109193 | 1477762 | 1833294 | 2182579 | 2542800 |
| 39529 | 375698 | 734481 | 1109322 | 1477861 | 1834553 | 2182615 | 2543023 |
| 39754 | 376335 | 734625 | 1109331 | 1478152 | 1834931 | 2182898 | 2543024 |
| 40043 | 376618 | 735596 | 1109769 | 1478383 | 1835638 | 2182899 | 2544256 |
| 40219 | 377405 | 735983 | 1110227 | 1478614 | 1835833 | 2183266 | 2545060 |
| 40837 | 377516 | 736196 | 1110248 | 1478791 | 1836178 | 2183395 | 2545383 |
| 40957 | 378092 | 736307 | 1110371 | 1478971 | 1836191 | 2183434 | 2545668 |
| 41048 | 378185 | 736577 | 1110494 | 1479373 | 1836192 | 2184647 | 2546097 |
| 41049 | 378885 | 738624 | 1110786 | 1479865 | 1837059 | 2184934 | 2546121 |
| 41162 | 379324 | 738684 | 1110787 | 1479988 | 1837554 | 2184965 | 2547499 |
| 42356 | 379325 | 738723 | 1111045 | 1479991 | 1837842 | 2184973 | 2548744 |
| 43278 | 379948 | 739038 | 1111396 | 1480042 | 1838761 | 2185049 | 2549002 |
| 43401 | 379949 | 740029 | 1111498 | 1480045 | 1839679 | 2185050 | 2549909 |
| 43439 | 380220 | 740635 | 1111514 | 1480333 | 1839850 | 2185258 | 2550176 |
| 44720 | 380783 | 740900 | 1111515 | 1480669 | 1840774 | 2185399 | 2550341 |
| 44721 | 381140 | 740901 | 1111659 | 1481041 | 1840795 | 2185454 | 2550904 |
| 45205 | 381149 | 741145 | 1111850 | 1481044 | 1841026 | 2185455 | 2551037 |
| 46259 | 381278 | 741340 | 1112526 | 1481419 | 1841467 | 2185878 | 2551343 |
| 47109 | 381320 | 741385 | 1112592 | 1481422 | 1841494 | 2185879 | 2551445 |
| 47966 | 381416 | 741632 | 1112655 | 1481428 | 1841527 | 2185880 | 2551613 |
| 48474 | 382317 | 742226 | 1112656 | 1481602 | 1841929 | 2186731 | 2551676 |
| 48936 | 382506 | 742706 | 1113163 | 1482550 | 1842832 | 2186845 | 2552685 |
| 51696 | 382560 | 743258 | 1113506 | 1483099 | 1842877 | 2187443 | 2552799 |
| 52345 | 382596 | 743776 | 1114674 | 1483258 | 1843582 | 2188031 | 2553193 |
| 52346 | 382810 | 745220 | 1114770 | 1483303 | 1844893 | 2188217 | 2554052 |
| 52371 | 382951 | 745823 | 1116109 | 1483432 | 1846097 | 2188661 | 2554196 |
| 52387 | 383349 | 747821 | 1116110 | 1483981 | 1846376 | 2188820 | 2555571 |
| 52388 | 383350 | 748400 | 1116433 | 1484011 | 1846391 | 2188907 | 2556508 |
| 52879 | 384550 | 748873 | 1117119 | 1484293 | 1846510 | 2189024 | 2557447 |
| 52880 | 384640 | 749236 | 1118209 | 1484437 | 1846777 | 2189625 | 2558167 |
| 52905 | 384691 | 749239 | 1119184 | 1485571 | 1846886 | 2189700 | 2558170 |
| 53073 | 384983 | 749445 | 1119697 | 1486123 | 1847420 | 2190162 | 2558191 |
| 54465 | 387034 | 749514 | 1120413 | 1486834 | 1847651 | 2190290 | 2558587 |
| 54466 | 387076 | 749964 | 1120632 | 1487134 | 1847670 | 2190358 | 2558995 |
| 54752 | 387307 | 750243 | 1121194 | 1487590 | 1847671 | 2191717 | 2559595 |
| 57474 | 388484 | 750408 | 1124168 | 1488922 | 1847744 | 2192005 | 2562075 |
| 57960 | 388607 | 751137 | 1124707 | 1489798 | 1847747 | 2192038 | 2562339 |
| 58995 | 389237 | 751705 | 1124888 | 1490110 | 1847813 | 2192915 | 2562629 |
| 59121 | 389302 | 751771 | 1125062 | 1490176 | 1848053 | 2193088 | 2562747 |
| 59769 | 389339 | 751843 | 1125401 | 1490323 | 1848559 | 2193265 | 2562748 |
| 60403 | 390318 | 752125 | 1125977 | 1490968 | 1848580 | 2193343 | 2562869 |
| 61779 | 391207 | 752323 | 1126022 | 1491289 | 1848823 | 2193454 | 2563713 |

|       |        |        |         |         |         |         |         |
|-------|--------|--------|---------|---------|---------|---------|---------|
| 63367 | 391572 | 752545 | 1126181 | 1491337 | 1849132 | 2193811 | 2564309 |
| 65037 | 391851 | 752668 | 1126214 | 1492849 | 1849244 | 2193886 | 2564391 |
| 66334 | 392130 | 753137 | 1126427 | 1493068 | 1849245 | 2193997 | 2564436 |
| 66562 | 392256 | 754223 | 1127174 | 1493113 | 1849517 | 2194063 | 2564824 |
| 67054 | 393245 | 754609 | 1128692 | 1493227 | 1849518 | 2195719 | 2564857 |
| 67057 | 395802 | 754765 | 1128695 | 1493257 | 1850088 | 2195980 | 2564860 |
| 67633 | 395901 | 755236 | 1129118 | 1493983 | 1850091 | 2196523 | 2565049 |
| 67754 | 396972 | 755649 | 1129166 | 1494118 | 1850295 | 2196640 | 2565085 |
| 69449 | 397161 | 756021 | 1130071 | 1494313 | 1850460 | 2196707 | 2565109 |
| 69659 | 397164 | 756402 | 1130194 | 1494361 | 1850759 | 2196708 | 2566432 |
| 69731 | 397204 | 757378 | 1130236 | 1494520 | 1851648 | 2197617 | 2567153 |
| 70146 | 397205 | 757708 | 1130698 | 1494679 | 1852376 | 2198125 | 2567207 |
| 71138 | 397762 | 758651 | 1130896 | 1494748 | 1852718 | 2198455 | 2567438 |
| 71849 | 398243 | 761279 | 1131405 | 1495093 | 1853397 | 2199820 | 2568476 |
| 72435 | 399808 | 761721 | 1132122 | 1495873 | 1854555 | 2201212 | 2568479 |
| 72436 | 399809 | 762201 | 1132794 | 1497400 | 1854585 | 2202534 | 2569690 |
| 72755 | 400391 | 762924 | 1132810 | 1498426 | 1854858 | 2203026 | 2570865 |
| 72884 | 400541 | 763423 | 1133579 | 1498672 | 1855162 | 2203797 | 2572388 |
| 72887 | 400565 | 763666 | 1134515 | 1498924 | 1855163 | 2203873 | 2572389 |
| 73541 | 400799 | 763669 | 1135459 | 1499086 | 1855551 | 2203874 | 2573715 |
| 73985 | 400970 | 763696 | 1135526 | 1499455 | 1856241 | 2204616 | 2573716 |
| 74333 | 401165 | 764035 | 1136139 | 1499458 | 1856322 | 2205029 | 2574560 |
| 74552 | 401189 | 764095 | 1136202 | 1499596 | 1856913 | 2206287 | 2574623 |
| 74735 | 401555 | 764338 | 1136215 | 1499686 | 1857349 | 2207052 | 2574815 |
| 76949 | 402006 | 765314 | 1136216 | 1500646 | 1857361 | 2207214 | 2575322 |
| 78465 | 402321 | 766143 | 1136224 | 1501402 | 1858336 | 2207235 | 2575718 |
| 78513 | 402759 | 766431 | 1136284 | 1501591 | 1858630 | 2207304 | 2576279 |
| 78810 | 403493 | 766833 | 1136580 | 1501666 | 1858648 | 2207343 | 2576390 |
| 80849 | 404685 | 766857 | 1136619 | 1502125 | 1858774 | 2209041 | 2577587 |
| 81257 | 405129 | 768650 | 1137250 | 1502153 | 1859464 | 2209904 | 2580487 |
| 81375 | 405333 | 770180 | 1137333 | 1502154 | 1859509 | 2210160 | 2580936 |
| 81503 | 405441 | 770573 | 1137795 | 1502473 | 1862674 | 2210161 | 2581023 |
| 81674 | 406113 | 770576 | 1138416 | 1502926 | 1862976 | 2210645 | 2581605 |
| 81946 | 407617 | 770690 | 1138513 | 1503415 | 1862982 | 2210753 | 2581747 |
| 82249 | 407740 | 770819 | 1138514 | 1503493 | 1863262 | 2211317 | 2581748 |
| 82828 | 408082 | 770957 | 1138954 | 1503523 | 1863263 | 2211422 | 2581893 |
| 82831 | 409045 | 771335 | 1138955 | 1504135 | 1865504 | 2211674 | 2582631 |
| 82945 | 410008 | 771509 | 1139565 | 1504186 | 1867148 | 2212632 | 2582769 |
| 83194 | 410209 | 771901 | 1139610 | 1505032 | 1868156 | 2212641 | 2582841 |
| 83413 | 413578 | 772324 | 1140133 | 1505935 | 1870835 | 2213177 | 2583084 |
| 83531 | 414029 | 772618 | 1140235 | 1506251 | 1871897 | 2213178 | 2583558 |
| 83789 | 414068 | 773020 | 1140274 | 1506252 | 1872374 | 2213527 | 2583658 |
| 83813 | 415171 | 773911 | 1140964 | 1506268 | 1872401 | 2213761 | 2583849 |

|       |        |        |         |         |         |         |         |
|-------|--------|--------|---------|---------|---------|---------|---------|
| 83906 | 415477 | 774001 | 1141061 | 1506329 | 1872498 | 2213884 | 2584185 |
| 84140 | 417538 | 774002 | 1141062 | 1506330 | 1872499 | 2213983 | 2584329 |
| 84263 | 418015 | 774105 | 1141177 | 1506337 | 1872515 | 2214194 | 2584479 |
| 84747 | 418270 | 774276 | 1141222 | 1506340 | 1872617 | 2214195 | 2584488 |
| 84838 | 418666 | 774333 | 1143450 | 1506382 | 1872792 | 2214601 | 2586268 |
| 84839 | 418957 | 774576 | 1145059 | 1506475 | 1872793 | 2214949 | 2586550 |
| 85143 | 419494 | 774594 | 1145149 | 1507117 | 1873701 | 2215162 | 2587349 |
| 85437 | 420199 | 774841 | 1146416 | 1507333 | 1873740 | 2216220 | 2587813 |
| 85869 | 420652 | 775870 | 1146473 | 1507414 | 1874503 | 2216221 | 2589411 |
| 86325 | 420742 | 776649 | 1146797 | 1509503 | 1874671 | 2216453 | 2589535 |
| 86413 | 420790 | 776799 | 1146914 | 1511240 | 1874683 | 2216555 | 2589562 |
| 86692 | 420954 | 777210 | 1147312 | 1511522 | 1875208 | 2217489 | 2589751 |
| 86966 | 420955 | 777213 | 1147561 | 1511525 | 1878056 | 2217850 | 2589814 |
| 87073 | 421265 | 777378 | 1148371 | 1511756 | 1878694 | 2218174 | 2589847 |
| 87076 | 421334 | 778166 | 1148761 | 1512048 | 1878817 | 2218475 | 2589937 |
| 87478 | 422870 | 778235 | 1148857 | 1512639 | 1878970 | 2219238 | 2589940 |
| 87484 | 423312 | 778547 | 1149079 | 1512651 | 1879123 | 2219268 | 2590646 |
| 87614 | 423768 | 779837 | 1149458 | 1512690 | 1880643 | 2219676 | 2591238 |
| 87615 | 424161 | 780401 | 1149971 | 1513815 | 1880662 | 2219823 | 2591239 |
| 87982 | 425500 | 780418 | 1150954 | 1514355 | 1880663 | 2220487 | 2592819 |
| 88006 | 426082 | 781690 | 1152264 | 1514659 | 1881766 | 2220829 | 2593152 |
| 88880 | 426199 | 781702 | 1152366 | 1515268 | 1881803 | 2221565 | 2593756 |
| 88952 | 426553 | 781729 | 1153958 | 1515364 | 1881804 | 2221715 | 2593837 |
| 89188 | 426804 | 782546 | 1154291 | 1515508 | 1882264 | 2221981 | 2593993 |
| 89872 | 427068 | 782853 | 1154579 | 1515778 | 1882456 | 2222293 | 2594146 |
| 89875 | 427143 | 784455 | 1154633 | 1515865 | 1882567 | 2223265 | 2594404 |
| 89974 | 427242 | 785041 | 1155801 | 1516846 | 1883112 | 2223682 | 2594758 |
| 90325 | 427776 | 785197 | 1156026 | 1516996 | 1884057 | 2224338 | 2594836 |
| 90445 | 427818 | 785341 | 1156681 | 1517080 | 1884311 | 2224440 | 2595304 |
| 90473 | 428659 | 785350 | 1156717 | 1519016 | 1884314 | 2225689 | 2595761 |
| 90474 | 429097 | 785668 | 1156927 | 1519043 | 1884332 | 2225710 | 2595762 |
| 90604 | 429328 | 786299 | 1157569 | 1520006 | 1886253 | 2226169 | 2595764 |
| 90712 | 429517 | 786300 | 1157773 | 1520260 | 1886785 | 2226295 | 2596487 |
| 91068 | 429833 | 786313 | 1157884 | 1520689 | 1886837 | 2226547 | 2596488 |
| 91415 | 430330 | 786559 | 1158064 | 1520762 | 1886838 | 2226997 | 2596999 |
| 91416 | 430601 | 787203 | 1158694 | 1521080 | 1887691 | 2227246 | 2597119 |
| 92652 | 430602 | 789018 | 1158811 | 1521081 | 1888319 | 2227702 | 2597212 |
| 92742 | 430606 | 789844 | 1159393 | 1521157 | 1888577 | 2228281 | 2597334 |
| 92856 | 430702 | 790716 | 1159876 | 1521685 | 1889889 | 2228875 | 2597706 |
| 92940 | 430768 | 790734 | 1160020 | 1521767 | 1891313 | 2229025 | 2597730 |
| 92994 | 430976 | 791851 | 1160866 | 1521768 | 1891940 | 2229637 | 2598009 |
| 93064 | 430977 | 793182 | 1161046 | 1522339 | 1892051 | 2229975 | 2598196 |
| 93065 | 433181 | 793197 | 1161385 | 1522780 | 1892273 | 2230751 | 2598322 |

|        |        |        |         |         |         |         |         |
|--------|--------|--------|---------|---------|---------|---------|---------|
| 93171  | 433265 | 795054 | 1161460 | 1522928 | 1892451 | 2230992 | 2598643 |
| 95948  | 434534 | 796570 | 1161836 | 1524421 | 1892452 | 2230993 | 2598706 |
| 96071  | 436266 | 796762 | 1162504 | 1524877 | 1892982 | 2231174 | 2599728 |
| 96170  | 437268 | 796891 | 1162549 | 1525426 | 1892983 | 2231468 | 2600822 |
| 96173  | 438986 | 797518 | 1163320 | 1525640 | 1893539 | 2231595 | 2601503 |
| 96603  | 439290 | 797921 | 1164007 | 1525641 | 1893590 | 2232677 | 2602042 |
| 97050  | 440265 | 798047 | 1164882 | 1525784 | 1894262 | 2236204 | 2602184 |
| 97527  | 441120 | 798239 | 1164936 | 1525785 | 1896377 | 2236650 | 2602752 |
| 97737  | 441922 | 799634 | 1165053 | 1526536 | 1896725 | 2236989 | 2602896 |
| 98119  | 442033 | 802284 | 1165056 | 1526539 | 1896773 | 2237049 | 2604079 |
| 98699  | 442072 | 802285 | 1165323 | 1527349 | 1897205 | 2237771 | 2604130 |
| 98700  | 442186 | 802628 | 1165587 | 1527614 | 1897312 | 2237777 | 2604259 |
| 99717  | 442468 | 803246 | 1166082 | 1528350 | 1897842 | 2238071 | 2604310 |
| 100559 | 443209 | 803540 | 1166277 | 1528584 | 1897968 | 2238152 | 2604382 |
| 100931 | 443557 | 804087 | 1166430 | 1529343 | 1897999 | 2238188 | 2604611 |
| 101408 | 443584 | 804088 | 1168329 | 1530345 | 1898000 | 2238447 | 2604632 |
| 101859 | 444077 | 804173 | 1168503 | 1530408 | 1898187 | 2239449 | 2604767 |
| 102695 | 444248 | 804185 | 1168707 | 1531659 | 1898301 | 2239945 | 2605097 |
| 102698 | 446378 | 805307 | 1169372 | 1532046 | 1899155 | 2240332 | 2605100 |
| 103199 | 446414 | 805787 | 1169781 | 1532214 | 1899156 | 2241412 | 2609221 |
| 103448 | 446417 | 806015 | 1171043 | 1532325 | 1899443 | 2241739 | 2609602 |
| 104629 | 446504 | 806039 | 1172626 | 1532700 | 1899512 | 2241790 | 2611307 |
| 104803 | 447712 | 806421 | 1174287 | 1532703 | 1899838 | 2242495 | 2612634 |
| 105517 | 447826 | 807372 | 1174308 | 1534112 | 1900382 | 2242633 | 2612706 |
| 105574 | 448013 | 808331 | 1174379 | 1534274 | 1901187 | 2242795 | 2612709 |
| 106574 | 448014 | 808925 | 1174395 | 1534334 | 1901256 | 2246213 | 2612781 |
| 106575 | 448045 | 809210 | 1176325 | 1534549 | 1901582 | 2247181 | 2613481 |
| 106588 | 448171 | 809483 | 1176326 | 1535229 | 1902090 | 2247526 | 2614557 |
| 108574 | 448701 | 809507 | 1176587 | 1535604 | 1902225 | 2247912 | 2615121 |
| 109669 | 449228 | 809666 | 1178129 | 1535803 | 1902918 | 2248851 | 2616165 |
| 110831 | 449252 | 810485 | 1178420 | 1536400 | 1903648 | 2249870 | 2616487 |
| 111012 | 449276 | 810486 | 1179739 | 1538287 | 1905470 | 2249909 | 2616745 |
| 111013 | 450402 | 811094 | 1179958 | 1539614 | 1905497 | 2250692 | 2619264 |
| 111029 | 450792 | 811658 | 1180694 | 1539636 | 1908199 | 2250875 | 2619854 |
| 111360 | 450846 | 811691 | 1182107 | 1539637 | 1908845 | 2251914 | 2619926 |
| 111361 | 451512 | 812846 | 1182446 | 1540529 | 1909061 | 2251920 | 2620034 |
| 111387 | 452112 | 813562 | 1183023 | 1540532 | 1909175 | 2252004 | 2620232 |
| 111388 | 456996 | 813634 | 1183200 | 1541066 | 1909892 | 2252722 | 2620802 |
| 111940 | 462950 | 814924 | 1183905 | 1541249 | 1911567 | 2252885 | 2621012 |
| 112111 | 465447 | 815482 | 1183932 | 1541897 | 1911750 | 2252933 | 2621303 |
| 112279 | 469203 | 815515 | 1184055 | 1542143 | 1912624 | 2253976 | 2621942 |
| 112309 | 469299 | 815668 | 1184680 | 1542275 | 1912625 | 2254057 | 2622066 |
| 112564 | 469389 | 816620 | 1185192 | 1542374 | 1912788 | 2254078 | 2622067 |

|        |        |        |         |         |         |         |         |
|--------|--------|--------|---------|---------|---------|---------|---------|
| 112603 | 469473 | 816821 | 1185784 | 1542617 | 1912866 | 2254108 | 2622593 |
| 112744 | 469590 | 817049 | 1186591 | 1542803 | 1913400 | 2254495 | 2624397 |
| 114118 | 469761 | 817535 | 1188032 | 1544304 | 1914354 | 2254570 | 2624574 |
| 114119 | 470430 | 817913 | 1189097 | 1545625 | 1915992 | 2254579 | 2625238 |
| 115710 | 470613 | 818135 | 1189325 | 1546142 | 1916130 | 2254669 | 2628301 |
| 115989 | 470928 | 818591 | 1189385 | 1546196 | 1916172 | 2255640 | 2628484 |
| 117056 | 471055 | 818852 | 1189939 | 1546413 | 1916439 | 2256938 | 2631154 |
| 117088 | 471123 | 818897 | 1190521 | 1546414 | 1916541 | 2259191 | 2631463 |
| 118252 | 472869 | 819050 | 1190560 | 1546673 | 1917337 | 2259365 | 2631614 |
| 119649 | 473529 | 820086 | 1190563 | 1548594 | 1921397 | 2260184 | 2631615 |
| 120123 | 474238 | 820776 | 1190925 | 1548624 | 1921434 | 2260341 | 2631643 |
| 120923 | 474239 | 820938 | 1191085 | 1549094 | 1921435 | 2261062 | 2633333 |
| 121118 | 474506 | 820939 | 1191169 | 1549971 | 1921439 | 2261474 | 2634304 |
| 121583 | 475733 | 821096 | 1191311 | 1550397 | 1921704 | 2261579 | 2634487 |
| 122196 | 476132 | 821270 | 1191312 | 1550688 | 1921891 | 2261624 | 2634835 |
| 123012 | 476136 | 821525 | 1191362 | 1550925 | 1922380 | 2262462 | 2634934 |
| 123904 | 476137 | 822382 | 1191553 | 1551006 | 1922470 | 2262798 | 2636256 |
| 124249 | 476378 | 822661 | 1191817 | 1552049 | 1923200 | 2262966 | 2636820 |
| 124576 | 476525 | 823132 | 1192077 | 1552229 | 1923350 | 2263371 | 2637423 |
| 124774 | 476759 | 823582 | 1192620 | 1554373 | 1923482 | 2264594 | 2637541 |
| 124889 | 476912 | 824089 | 1193262 | 1554568 | 1923797 | 2265365 | 2637542 |
| 125686 | 477273 | 824572 | 1193963 | 1554733 | 1923938 | 2265871 | 2637825 |
| 126367 | 477477 | 825176 | 1194011 | 1554904 | 1924022 | 2266009 | 2639760 |
| 127408 | 477807 | 825619 | 1194383 | 1555537 | 1924523 | 2266159 | 2641452 |
| 127942 | 478555 | 826297 | 1194749 | 1555538 | 1924942 | 2266746 | 2642210 |
| 127948 | 478807 | 826830 | 1195065 | 1555662 | 1925107 | 2269106 | 2642605 |
| 128383 | 479233 | 827100 | 1195066 | 1556636 | 1925136 | 2270292 | 2642606 |
| 128419 | 479309 | 828824 | 1195082 | 1556684 | 1925308 | 2270340 | 2642688 |
| 128642 | 479310 | 828861 | 1195235 | 1556708 | 1925773 | 2270578 | 2642988 |
| 129329 | 479329 | 829329 | 1195382 | 1556711 | 1925881 | 2270872 | 2643006 |
| 129332 | 479332 | 830218 | 1195517 | 1557290 | 1926016 | 2271205 | 2643375 |
| 129871 | 479533 | 830347 | 1195736 | 1558414 | 1926088 | 2273010 | 2644921 |
| 129872 | 479953 | 830350 | 1195827 | 1558474 | 1927820 | 2273199 | 2645842 |
| 130869 | 480010 | 830623 | 1195828 | 1558597 | 1928164 | 2273244 | 2646868 |
| 131438 | 480847 | 830791 | 1195907 | 1558801 | 1928342 | 2273331 | 2646901 |
| 131541 | 480859 | 832911 | 1196447 | 1558996 | 1929522 | 2273334 | 2647293 |
| 132846 | 481386 | 832914 | 1198002 | 1559308 | 1930562 | 2273460 | 2647389 |
| 133290 | 481387 | 833637 | 1198053 | 1559440 | 1932362 | 2273535 | 2648111 |
| 133706 | 481469 | 833667 | 1198597 | 1563621 | 1933019 | 2273818 | 2649197 |
| 134297 | 481661 | 833676 | 1198598 | 1565295 | 1934053 | 2274106 | 2649713 |
| 135084 | 481862 | 833721 | 1198782 | 1565844 | 1934508 | 2274469 | 2649929 |
| 135918 | 481952 | 834106 | 1199793 | 1565928 | 1934673 | 2275048 | 2652077 |
| 136398 | 481968 | 834274 | 1200216 | 1566237 | 1935061 | 2277202 | 2652170 |

|        |        |        |         |         |         |         |         |
|--------|--------|--------|---------|---------|---------|---------|---------|
| 137470 | 481969 | 835237 | 1201643 | 1566718 | 1935062 | 2277568 | 2654291 |
| 137677 | 483242 | 835520 | 1201838 | 1566719 | 1935177 | 2277826 | 2654492 |
| 137744 | 483243 | 835804 | 1201988 | 1567143 | 1935180 | 2278066 | 2655572 |
| 137839 | 483536 | 835978 | 1202219 | 1567158 | 1936005 | 2278261 | 2655983 |
| 138226 | 483677 | 836445 | 1203774 | 1568657 | 1936605 | 2279198 | 2656824 |
| 138304 | 484198 | 836591 | 1204037 | 1568666 | 1937419 | 2280489 | 2657499 |
| 138409 | 485535 | 837095 | 1204154 | 1568933 | 1937455 | 2280490 | 2657961 |
| 138643 | 486070 | 837310 | 1205315 | 1568936 | 1937779 | 2280569 | 2658017 |
| 139756 | 486576 | 837712 | 1205467 | 1569881 | 1938836 | 2281175 | 2660173 |
| 141650 | 487129 | 838657 | 1205944 | 1570326 | 1939198 | 2281176 | 2660416 |
| 142488 | 487825 | 839503 | 1206465 | 1572896 | 1939201 | 2281321 | 2660897 |
| 142491 | 488416 | 839737 | 1206543 | 1574003 | 1939725 | 2283128 | 2661272 |
| 142863 | 488650 | 840718 | 1206552 | 1574750 | 1940196 | 2283467 | 2662106 |
| 143112 | 489034 | 841063 | 1207162 | 1575799 | 1940895 | 2286098 | 2662495 |
| 143262 | 489151 | 841451 | 1207178 | 1577112 | 1941163 | 2286137 | 2662696 |
| 143456 | 489169 | 841490 | 1207367 | 1577271 | 1942082 | 2286599 | 2663403 |
| 143688 | 489229 | 841865 | 1207368 | 1577406 | 1942319 | 2286962 | 2663876 |
| 143709 | 489328 | 842324 | 1207393 | 1578042 | 1942592 | 2288240 | 2663994 |
| 143710 | 489604 | 843230 | 1207573 | 1578229 | 1944024 | 2288441 | 2664074 |
| 144221 | 489772 | 843254 | 1207843 | 1578688 | 1944099 | 2288816 | 2664765 |
| 144224 | 489787 | 843350 | 1208321 | 1578742 | 1945550 | 2289335 | 2664792 |
| 144296 | 489814 | 843437 | 1208322 | 1579461 | 1945860 | 2289470 | 2665584 |
| 144392 | 490702 | 843665 | 1208772 | 1579779 | 1946076 | 2289479 | 2666376 |
| 144395 | 490744 | 843683 | 1208908 | 1579934 | 1946077 | 2289896 | 2666914 |
| 144503 | 490930 | 844139 | 1210706 | 1580671 | 1946603 | 2289935 | 2667091 |
| 144545 | 491131 | 844283 | 1211185 | 1581668 | 1946869 | 2289956 | 2667202 |
| 144785 | 491637 | 844310 | 1212327 | 1581669 | 1946992 | 2290037 | 2667253 |
| 145022 | 491646 | 844805 | 1212344 | 1581709 | 1947046 | 2290529 | 2667901 |
| 146376 | 491676 | 845147 | 1212352 | 1583165 | 1947106 | 2290532 | 2668884 |
| 146755 | 491685 | 845243 | 1212596 | 1583492 | 1947163 | 2291057 | 2669639 |
| 146756 | 492330 | 846428 | 1213034 | 1583573 | 1947280 | 2291905 | 2669957 |
| 146814 | 492669 | 846725 | 1213730 | 1583659 | 1948467 | 2292322 | 2669965 |
| 147604 | 492681 | 846767 | 1213733 | 1583675 | 1948753 | 2293175 | 2672199 |
| 147659 | 492843 | 847270 | 1213985 | 1583729 | 1948754 | 2293256 | 2672872 |
| 147660 | 492891 | 848430 | 1214367 | 1583816 | 1948957 | 2293846 | 2673414 |
| 147667 | 493989 | 848745 | 1214380 | 1583854 | 1949050 | 2294470 | 2674775 |
| 147901 | 494037 | 849009 | 1214381 | 1583946 | 1949165 | 2295098 | 2675173 |
| 149111 | 494088 | 849129 | 1214520 | 1583947 | 1949275 | 2295572 | 2675251 |
| 149742 | 494335 | 849237 | 1214853 | 1584158 | 1949362 | 2295575 | 2675311 |
| 150135 | 494336 | 849279 | 1215528 | 1584275 | 1949546 | 2295957 | 2675399 |
| 150573 | 494418 | 850027 | 1215729 | 1584797 | 1949547 | 2295958 | 2675534 |
| 150741 | 494478 | 850126 | 1216272 | 1585169 | 1950688 | 2296514 | 2675535 |
| 150996 | 494697 | 850246 | 1216919 | 1585523 | 1950748 | 2296515 | 2676168 |

|        |        |        |         |         |         |         |         |
|--------|--------|--------|---------|---------|---------|---------|---------|
| 151095 | 494711 | 850660 | 1218129 | 1585718 | 1951739 | 2296815 | 2676504 |
| 151221 | 494859 | 851395 | 1218372 | 1586558 | 1952279 | 2296852 | 2677311 |
| 151350 | 495798 | 853037 | 1219183 | 1587239 | 1953469 | 2296853 | 2678358 |
| 151428 | 496212 | 853298 | 1219207 | 1587665 | 1954343 | 2296857 | 2678874 |
| 151944 | 496215 | 853949 | 1219723 | 1587875 | 1954817 | 2297128 | 2679585 |
| 152205 | 496383 | 855361 | 1220029 | 1587878 | 1954820 | 2297305 | 2679951 |
| 152866 | 496467 | 855670 | 1220098 | 1588680 | 1955202 | 2297599 | 2680362 |
| 152871 | 496872 | 856370 | 1220197 | 1588704 | 1955203 | 2297731 | 2681139 |
| 153063 | 497091 | 857298 | 1220317 | 1589040 | 1955650 | 2298076 | 2681250 |
| 153306 | 497142 | 858941 | 1221478 | 1589704 | 1956055 | 2298298 | 2681637 |
| 153594 | 497535 | 859340 | 1221529 | 1589968 | 1956105 | 2298529 | 2682135 |
| 153678 | 498007 | 859571 | 1221769 | 1590397 | 1956163 | 2298572 | 2685542 |
| 153723 | 498105 | 861778 | 1222580 | 1591890 | 1956164 | 2298573 | 2685556 |
| 154071 | 498620 | 862904 | 1222955 | 1592290 | 1956292 | 2298901 | 2685603 |
| 154413 | 498671 | 863161 | 1223020 | 1592362 | 1956313 | 2299007 | 2685604 |
| 154482 | 499591 | 864060 | 1223188 | 1592656 | 1956570 | 2299008 | 2685728 |
| 154512 | 499732 | 864703 | 1223458 | 1594014 | 1956747 | 2299069 | 2687448 |
| 154653 | 500305 | 864706 | 1223474 | 1594233 | 1957151 | 2299105 | 2688315 |
| 155502 | 500479 | 864952 | 1223475 | 1594326 | 1957253 | 2299388 | 2688381 |
| 155740 | 500503 | 866622 | 1224524 | 1594554 | 1957441 | 2299389 | 2688555 |
| 155741 | 501003 | 867101 | 1226488 | 1594830 | 1957616 | 2299756 | 2689115 |
| 155796 | 501549 | 867102 | 1227210 | 1595025 | 1958325 | 2299885 | 2689241 |
| 156151 | 502630 | 867512 | 1228072 | 1595169 | 1958502 | 2299924 | 2689736 |
| 156444 | 502631 | 869994 | 1228426 | 1595940 | 1958796 | 2301137 | 2689844 |
| 156771 | 502686 | 870120 | 1229454 | 1595952 | 1958928 | 2301424 | 2689853 |
| 156783 | 502827 | 870342 | 1230135 | 1596030 | 1959273 | 2301455 | 2690735 |
| 157373 | 503035 | 870573 | 1230729 | 1596060 | 1959495 | 2301463 | 2691300 |
| 158104 | 503036 | 870900 | 1230894 | 1596561 | 1959726 | 2301539 | 2691372 |
| 158356 | 503112 | 870982 | 1231002 | 1596894 | 1959769 | 2301540 | 2691444 |
| 158359 | 503120 | 871579 | 1231014 | 1600655 | 1959770 | 2301748 | 2691504 |
| 158422 | 503151 | 871595 | 1232650 | 1600656 | 1960098 | 2301889 | 2691657 |
| 158719 | 503438 | 871596 | 1233755 | 1600783 | 1960204 | 2301944 | 2691774 |
| 158962 | 504469 | 874839 | 1234170 | 1600987 | 1960205 | 2301945 | 2691837 |
| 159181 | 504508 | 875354 | 1234257 | 1601212 | 1960266 | 2302617 | 2692515 |
| 159637 | 504637 | 875355 | 1234440 | 1601481 | 1960302 | 2302649 | 2692869 |
| 159640 | 505004 | 875458 | 1234980 | 1601482 | 1960585 | 2303382 | 2693160 |
| 159880 | 505005 | 877101 | 1235048 | 1601645 | 1960586 | 2303448 | 2693898 |
| 160602 | 505288 | 877654 | 1236065 | 1602297 | 1960953 | 2303595 | 2693920 |
| 161165 | 505324 | 877810 | 1236212 | 1602414 | 1961082 | 2303883 | 2693965 |
| 161297 | 505385 | 878807 | 1236260 | 1602549 | 1961121 | 2303886 | 2694089 |
| 164329 | 505386 | 878885 | 1236577 | 1602921 | 1962261 | 2304762 | 2694090 |
| 165031 | 505492 | 879515 | 1236688 | 1603164 | 1962548 | 2304798 | 2694586 |
| 165235 | 505820 | 880157 | 1236826 | 1603191 | 1962579 | 2304870 | 2694667 |



|        |        |        |         |         |         |         |         |
|--------|--------|--------|---------|---------|---------|---------|---------|
| 165658 | 505821 | 881387 | 1237375 | 1603505 | 1962587 | 2305050 | 2694706 |
| 165751 | 505864 | 882063 | 1237393 | 1603523 | 1962663 | 2306216 | 2694907 |
| 166816 | 506095 | 882531 | 1237432 | 1603571 | 1962664 | 2306526 | 2695276 |
| 167197 | 506317 | 882582 | 1238080 | 1604644 | 1962872 | 2306527 | 2695444 |
| 167544 | 506662 | 883592 | 1238652 | 1604767 | 1963013 | 2306901 | 2695698 |
| 167546 | 506794 | 883961 | 1239105 | 1604902 | 1963068 | 2306902 | 2696420 |
| 167547 | 507088 | 884375 | 1239141 | 1605893 | 1963069 | 2307056 | 2696831 |
| 167975 | 507265 | 884807 | 1239147 | 1607111 | 1963999 | 2307128 | 2698052 |
| 168116 | 508777 | 886078 | 1239537 | 1607369 | 1965037 | 2307335 | 2698127 |
| 168289 | 509494 | 886564 | 1240424 | 1607537 | 1965254 | 2307675 | 2698340 |
| 168664 | 509767 | 887292 | 1240526 | 1607651 | 1965597 | 2308516 | 2698464 |
| 169325 | 510314 | 887589 | 1240553 | 1608136 | 1966224 | 2308921 | 2698465 |
| 169748 | 510683 | 888044 | 1241321 | 1609051 | 1966851 | 2308924 | 2699403 |
| 169799 | 511343 | 888137 | 1242212 | 1609234 | 1966878 | 2308972 | 2699889 |
| 170491 | 511733 | 888143 | 1242434 | 1610414 | 1966983 | 2309197 | 2702770 |
| 170626 | 512102 | 889571 | 1243110 | 1610492 | 1967103 | 2309245 | 2703187 |
| 171261 | 512150 | 889574 | 1243679 | 1610495 | 1967197 | 2309672 | 2703424 |
| 171417 | 512561 | 892067 | 1244290 | 1610702 | 1968071 | 2310008 | 2704474 |
| 171936 | 512780 | 892181 | 1244731 | 1610960 | 1968072 | 2310879 | 2704621 |
| 172336 | 512864 | 892211 | 1245829 | 1611287 | 1969174 | 2310906 | 2704819 |
| 172337 | 514173 | 892449 | 1246126 | 1611756 | 1969405 | 2311647 | 2705680 |
| 172662 | 514194 | 892450 | 1246657 | 1612140 | 1969678 | 2311884 | 2706274 |
| 172665 | 515072 | 892603 | 1246729 | 1612179 | 1970014 | 2313561 | 2706310 |
| 173138 | 515144 | 892849 | 1246993 | 1612269 | 1970165 | 2314397 | 2706457 |
| 173270 | 516004 | 893209 | 1247144 | 1612674 | 1970166 | 2314580 | 2706587 |
| 174299 | 517006 | 894320 | 1247145 | 1613102 | 1970350 | 2315790 | 2706588 |
| 174587 | 517432 | 894368 | 1247497 | 1614584 | 1970918 | 2315847 | 2707049 |
| 175013 | 517912 | 894704 | 1247629 | 1614810 | 1971381 | 2315907 | 2707372 |
| 175016 | 518350 | 894924 | 1248614 | 1615087 | 1971803 | 2315985 | 2709071 |
| 175427 | 519047 | 894925 | 1249074 | 1615270 | 1971804 | 2316132 | 2709200 |
| 175796 | 519585 | 895074 | 1249542 | 1615924 | 1972156 | 2317284 | 2709638 |
| 175817 | 519888 | 895075 | 1249636 | 1616098 | 1972225 | 2317356 | 2710537 |
| 176237 | 519933 | 895538 | 1249645 | 1616339 | 1972438 | 2317692 | 2710675 |
| 176522 | 520362 | 896371 | 1249963 | 1616885 | 1972507 | 2319577 | 2710735 |
| 178356 | 520947 | 896848 | 1250095 | 1616888 | 1972594 | 2319814 | 2711032 |
| 179962 | 521058 | 896962 | 1250287 | 1616969 | 1972665 | 2320060 | 2711221 |
| 180576 | 521734 | 897010 | 1250585 | 1617560 | 1972711 | 2320330 | 2711365 |
| 180825 | 523658 | 897834 | 1251224 | 1618003 | 1972971 | 2320801 | 2711371 |
| 181713 | 523733 | 898059 | 1252340 | 1618554 | 1973131 | 2320954 | 2711826 |
| 181716 | 523916 | 899336 | 1253206 | 1619240 | 1973132 | 2321314 | 2712282 |
| 181878 | 523919 | 899441 | 1253533 | 1619449 | 1973195 | 2321698 | 2712534 |
| 182588 | 524843 | 899540 | 1253596 | 1619450 | 1973200 | 2322369 | 2712660 |
| 182664 | 525103 | 900441 | 1253638 | 1619517 | 1973287 | 2322546 | 2712849 |

|        |        |        |         |         |         |         |         |
|--------|--------|--------|---------|---------|---------|---------|---------|
| 183221 | 525742 | 900600 | 1253704 | 1620261 | 1973288 | 2323965 | 2713050 |
| 183727 | 526191 | 900996 | 1254007 | 1620743 | 1973848 | 2324250 | 2713200 |
| 184427 | 527407 | 901381 | 1255174 | 1621205 | 1973849 | 2324253 | 2713230 |
| 184428 | 527712 | 901382 | 1255786 | 1621832 | 1974217 | 2324663 | 2713239 |
| 184772 | 528078 | 902322 | 1255876 | 1622050 | 1974364 | 2325063 | 2715352 |
| 184879 | 528870 | 902325 | 1256919 | 1622380 | 1975875 | 2325752 | 2715484 |
| 185441 | 528990 | 902334 | 1256988 | 1622713 | 1976148 | 2325987 | 2715700 |
| 185738 | 529146 | 903709 | 1257610 | 1622755 | 1976382 | 2325988 | 2715904 |
| 185819 | 529257 | 903837 | 1257932 | 1622794 | 1977078 | 2326004 | 2716096 |
| 186507 | 529311 | 903990 | 1258088 | 1623175 | 1977090 | 2326203 | 2716252 |
| 186543 | 529572 | 904413 | 1258331 | 1623262 | 1977246 | 2326204 | 2716445 |
| 186948 | 529878 | 904419 | 1258607 | 1623337 | 1978157 | 2327291 | 2716446 |
| 187002 | 530406 | 904680 | 1258907 | 1623385 | 1978406 | 2327687 | 2716774 |
| 187671 | 531622 | 906381 | 1259030 | 1623523 | 1979058 | 2327735 | 2718193 |
| 187867 | 531814 | 906477 | 1259174 | 1623535 | 1979734 | 2328068 | 2718251 |
| 187868 | 533172 | 908371 | 1259222 | 1624283 | 1980294 | 2328490 | 2718252 |
| 188061 | 533265 | 909862 | 1260173 | 1625254 | 1981617 | 2328568 | 2718268 |
| 188079 | 533853 | 910276 | 1260485 | 1626330 | 1981995 | 2328607 | 2719545 |
| 188124 | 533857 | 910279 | 1261271 | 1627238 | 1982274 | 2328670 | 2719546 |
| 188301 | 533858 | 911243 | 1261272 | 1627943 | 1982588 | 2328847 | 2723089 |
| 189020 | 535020 | 911355 | 1262451 | 1628906 | 1983171 | 2328982 | 2723131 |
| 189386 | 535244 | 911706 | 1262700 | 1629134 | 1983172 | 2329081 | 2723312 |
| 190516 | 535967 | 911781 | 1262838 | 1629613 | 1983612 | 2329288 | 2723432 |
| 190627 | 536228 | 913376 | 1264047 | 1629793 | 1983613 | 2329849 | 2723840 |
| 190642 | 536426 | 913517 | 1264122 | 1629970 | 1983710 | 2330116 | 2723966 |
| 190708 | 536450 | 913547 | 1264346 | 1630084 | 1984331 | 2330167 | 2724779 |
| 190837 | 536453 | 913661 | 1265315 | 1631118 | 1984793 | 2330422 | 2725143 |
| 190987 | 536489 | 913923 | 1265537 | 1631130 | 1984876 | 2330923 | 2725332 |
| 191047 | 536586 | 913924 | 1265570 | 1631731 | 1985507 | 2331259 | 2725656 |
| 191888 | 536778 | 915981 | 1265573 | 1631737 | 1985546 | 2331320 | 2726029 |
| 192710 | 537030 | 916422 | 1265577 | 1631920 | 1985842 | 2331834 | 2726365 |
| 192724 | 537451 | 916449 | 1265578 | 1632331 | 1985902 | 2331835 | 2726888 |
| 192770 | 537505 | 917619 | 1265600 | 1633418 | 1985910 | 2332068 | 2727273 |
| 193292 | 537508 | 918207 | 1265903 | 1633457 | 1985911 | 2332069 | 2727274 |
| 193706 | 537736 | 918343 | 1265994 | 1633790 | 1985924 | 2332085 | 2727302 |
| 193713 | 537742 | 918793 | 1266069 | 1634264 | 1985987 | 2332432 | 2727837 |
| 193766 | 538150 | 918799 | 1266426 | 1634675 | 1986600 | 2332967 | 2728182 |
| 193826 | 538204 | 919132 | 1266504 | 1635390 | 1986667 | 2332968 | 2729035 |
| 194149 | 538861 | 920062 | 1266984 | 1635720 | 1987611 | 2333104 | 2729755 |
| 194348 | 538918 | 920093 | 1267095 | 1635723 | 1988547 | 2333120 | 2729818 |
| 195914 | 539137 | 920177 | 1267155 | 1636439 | 1989316 | 2333121 | 2730714 |
| 196446 | 539986 | 920306 | 1267200 | 1636986 | 1989332 | 2333315 | 2730762 |
| 196509 | 540118 | 922190 | 1268109 | 1637838 | 1989845 | 2333316 | 2731257 |

|        |        |        |         |         |         |         |         |
|--------|--------|--------|---------|---------|---------|---------|---------|
| 197073 | 540283 | 922460 | 1268520 | 1638090 | 1990004 | 2334177 | 2731507 |
| 197775 | 541385 | 922571 | 1268544 | 1638384 | 1991230 | 2334492 | 2731991 |
| 197788 | 541484 | 923342 | 1268739 | 1638417 | 1991428 | 2335016 | 2731994 |
| 197868 | 541550 | 923943 | 1270180 | 1638774 | 1991890 | 2335311 | 2732114 |
| 198607 | 542323 | 924105 | 1270735 | 1639698 | 1991932 | 2335374 | 2732302 |
| 198608 | 542360 | 924759 | 1270816 | 1639725 | 1992960 | 2335428 | 2732326 |
| 198838 | 542361 | 925491 | 1271446 | 1639824 | 1993008 | 2335656 | 2733147 |
| 198839 | 542726 | 925668 | 1272182 | 1640259 | 1993431 | 2335830 | 2733237 |
| 199053 | 542906 | 926022 | 1272542 | 1640415 | 1993434 | 2337096 | 2733417 |
| 199192 | 543016 | 926031 | 1273615 | 1640877 | 1994952 | 2338894 | 2733423 |
| 199193 | 544073 | 926580 | 1273795 | 1641054 | 1995702 | 2338895 | 2733660 |
| 199979 | 544220 | 926913 | 1273993 | 1641549 | 1995915 | 2339139 | 2734433 |
| 200419 | 545153 | 927567 | 1275012 | 1641633 | 1995948 | 2339466 | 2735875 |
| 200440 | 546586 | 928053 | 1275063 | 1642176 | 1996107 | 2340166 | 2736121 |
| 200758 | 546762 | 928083 | 1275264 | 1643197 | 1996152 | 2341084 | 2736832 |
| 200774 | 547189 | 928350 | 1275801 | 1645282 | 1996728 | 2341135 | 2737085 |
| 200775 | 547190 | 928666 | 1275843 | 1645888 | 1997148 | 2341195 | 2737520 |
| 200948 | 547245 | 928667 | 1275859 | 1646086 | 1997241 | 2341198 | 2738076 |
| 200949 | 547386 | 928683 | 1275860 | 1646626 | 1997422 | 2341297 | 2738308 |
| 201004 | 547594 | 928770 | 1276017 | 1646629 | 1997961 | 2341438 | 2738309 |
| 202414 | 547595 | 928863 | 1276263 | 1646804 | 2000934 | 2341549 | 2738436 |
| 202459 | 547671 | 929058 | 1277752 | 1646805 | 2001496 | 2341639 | 2738713 |
| 202729 | 547679 | 929218 | 1278525 | 1646908 | 2001715 | 2343158 | 2738781 |
| 202753 | 547710 | 929219 | 1278585 | 1647245 | 2002431 | 2343159 | 2739321 |
| 204646 | 547997 | 929754 | 1278852 | 1647833 | 2002944 | 2343436 | 2739394 |
| 204850 | 549000 | 929988 | 1279113 | 1648013 | 2003919 | 2343499 | 2739395 |
| 205921 | 549039 | 930504 | 1279458 | 1648577 | 2005009 | 2344246 | 2739483 |
| 206996 | 549168 | 930801 | 1279794 | 1648580 | 2005695 | 2345138 | 2740259 |
| 207151 | 549535 | 931071 | 1280798 | 1648742 | 2006018 | 2345276 | 2740388 |
| 208281 | 549536 | 931074 | 1280845 | 1649057 | 2006019 | 2345405 | 2740436 |
| 208282 | 549819 | 931224 | 1280951 | 1649078 | 2007358 | 2345864 | 2740487 |
| 208667 | 549855 | 931278 | 1280972 | 1649507 | 2007454 | 2346461 | 2741094 |
| 210898 | 549916 | 931758 | 1281056 | 1649510 | 2008621 | 2346596 | 2741409 |
| 211718 | 549917 | 932874 | 1282359 | 1650011 | 2008964 | 2348671 | 2741742 |
| 212717 | 550023 | 933138 | 1282362 | 1650203 | 2009471 | 2348740 | 2741790 |
| 212792 | 550351 | 933850 | 1283311 | 1650371 | 2009472 | 2348923 | 2742043 |
| 212858 | 550352 | 934526 | 1284657 | 1650869 | 2009535 | 2349070 | 2742325 |
| 214587 | 550395 | 934709 | 1285150 | 1651318 | 2009601 | 2349112 | 2742328 |
| 214992 | 550626 | 934796 | 1285390 | 1651384 | 2010277 | 2349157 | 2742499 |
| 215094 | 550848 | 935120 | 1285406 | 1651540 | 2010468 | 2349922 | 2742937 |
| 215537 | 551193 | 936161 | 1285610 | 1651849 | 2010612 | 2350018 | 2743534 |
| 215708 | 551325 | 936323 | 1285611 | 1652042 | 2010613 | 2350303 | 2744015 |
| 216077 | 551619 | 937514 | 1285819 | 1653639 | 2010629 | 2353572 | 2744228 |

|        |        |        |         |         |         |         |         |
|--------|--------|--------|---------|---------|---------|---------|---------|
| 216557 | 551796 | 937518 | 1285879 | 1653828 | 2010731 | 2354205 | 2744648 |
| 216585 | 552799 | 937519 | 1286850 | 1653873 | 2011082 | 2354427 | 2745504 |
| 216854 | 552811 | 937842 | 1287736 | 1654502 | 2011340 | 2355051 | 2746164 |
| 217178 | 552970 | 937843 | 1287739 | 1654517 | 2011341 | 2355482 | 2746254 |
| 217295 | 553021 | 938039 | 1288738 | 1654777 | 2011633 | 2355563 | 2746428 |
| 217316 | 553093 | 938528 | 1288810 | 1655251 | 2011756 | 2355758 | 2746635 |
| 218585 | 553192 | 938915 | 1288873 | 1655416 | 2011879 | 2355833 | 2747035 |
| 218599 | 553804 | 939050 | 1290030 | 1655539 | 2011900 | 2355900 | 2747134 |
| 219340 | 554649 | 939498 | 1290549 | 1655863 | 2012358 | 2355901 | 2747320 |
| 219601 | 554832 | 939573 | 1291221 | 1656418 | 2012796 | 2355983 | 2747356 |
| 220045 | 555045 | 939690 | 1291224 | 1657383 | 2012805 | 2356263 | 2747368 |
| 220360 | 555102 | 940482 | 1291626 | 1657404 | 2012934 | 2356264 | 2747593 |
| 220573 | 555243 | 941412 | 1292520 | 1659165 | 2013273 | 2357220 | 2748328 |
| 221147 | 555408 | 941505 | 1293036 | 1659166 | 2013333 | 2357442 | 2749629 |
| 221241 | 555411 | 942367 | 1294062 | 1659389 | 2013788 | 2358888 | 2750347 |
| 221242 | 555992 | 943079 | 1295505 | 1659932 | 2014232 | 2358891 | 2750483 |
| 221345 | 556004 | 943796 | 1296058 | 1660187 | 2014589 | 2358897 | 2750552 |
| 221441 | 557230 | 944171 | 1296581 | 1660656 | 2014590 | 2358921 | 2750786 |
| 222272 | 557584 | 944938 | 1296623 | 1660668 | 2015185 | 2359619 | 2752604 |
| 223340 | 557653 | 945431 | 1296626 | 1660830 | 2015236 | 2359620 | 2752997 |
| 224480 | 557944 | 945432 | 1296752 | 1662286 | 2015728 | 2360036 | 2753325 |
| 225191 | 558338 | 946125 | 1297115 | 1662382 | 2016186 | 2360614 | 2753326 |
| 226163 | 558680 | 947083 | 1297355 | 1662645 | 2016187 | 2360977 | 2753559 |
| 226164 | 559551 | 947084 | 1297664 | 1662873 | 2016311 | 2361310 | 2753560 |
| 226964 | 561036 | 947608 | 1297766 | 1663179 | 2016868 | 2362006 | 2753687 |
| 227315 | 561138 | 948211 | 1299117 | 1663453 | 2016869 | 2364166 | 2753855 |
| 227376 | 561147 | 948250 | 1299156 | 1663456 | 2016885 | 2364980 | 2754336 |
| 227377 | 562129 | 948298 | 1299990 | 1663586 | 2017654 | 2365410 | 2756125 |
| 227609 | 562172 | 948766 | 1300361 | 1664163 | 2018257 | 2365497 | 2756201 |
| 228446 | 562173 | 949245 | 1300829 | 1664808 | 2018423 | 2365647 | 2756312 |
| 228833 | 562882 | 949320 | 1300907 | 1665388 | 2018424 | 2365917 | 2756321 |
| 229811 | 563071 | 949551 | 1301036 | 1665781 | 2018440 | 2365926 | 2756627 |
| 229923 | 563302 | 949776 | 1301144 | 1666339 | 2018482 | 2366070 | 2756758 |
| 229924 | 563311 | 951692 | 1302380 | 1666706 | 2018578 | 2366154 | 2756785 |
| 230024 | 565532 | 952183 | 1302425 | 1666979 | 2018713 | 2366163 | 2756816 |
| 230402 | 565535 | 952456 | 1302482 | 1667057 | 2018749 | 2366298 | 2756864 |
| 230723 | 565898 | 953507 | 1302641 | 1668549 | 2018904 | 2366374 | 2757392 |
| 230753 | 566057 | 953568 | 1303145 | 1669895 | 2019496 | 2366375 | 2757393 |
| 230762 | 566297 | 953922 | 1303376 | 1670051 | 2019819 | 2366415 | 2757514 |
| 232273 | 567289 | 954351 | 1306452 | 1671371 | 2019950 | 2366999 | 2757709 |
| 232866 | 567493 | 954792 | 1307439 | 1672097 | 2020024 | 2368541 | 2758012 |
| 233151 | 567577 | 954813 | 1308111 | 1672256 | 2020025 | 2370171 | 2758045 |
| 233808 | 567977 | 955489 | 1308123 | 1672334 | 2021508 | 2371043 | 2758377 |

|        |        |        |         |         |         |         |         |
|--------|--------|--------|---------|---------|---------|---------|---------|
| 233928 | 568188 | 955776 | 1308165 | 1672571 | 2022205 | 2371877 | 2758771 |
| 234714 | 568189 | 956211 | 1308336 | 1672864 | 2022268 | 2372321 | 2758846 |
| 235211 | 568368 | 957250 | 1308543 | 1673272 | 2022439 | 2372927 | 2759192 |
| 235329 | 568369 | 957349 | 1308739 | 1673299 | 2022499 | 2373163 | 2759357 |
| 235924 | 569674 | 957484 | 1308940 | 1673569 | 2023446 | 2373273 | 2760032 |
| 236264 | 569677 | 958725 | 1309066 | 1673842 | 2024919 | 2373274 | 2760371 |
| 236265 | 570133 | 959079 | 1309570 | 1673926 | 2025713 | 2373425 | 2761082 |
| 236812 | 570492 | 959172 | 1310179 | 1674064 | 2026513 | 2373455 | 2761083 |
| 237642 | 570872 | 959277 | 1310215 | 1674960 | 2026519 | 2373515 | 2761129 |
| 237885 | 570923 | 959582 | 1310338 | 1675056 | 2028308 | 2373572 | 2761285 |
| 237972 | 570956 | 959933 | 1310736 | 1675131 | 2028869 | 2374323 | 2761906 |
| 238002 | 572244 | 960624 | 1310835 | 1675281 | 2030004 | 2374599 | 2762056 |
| 238083 | 573507 | 960637 | 1311375 | 1675572 | 2030388 | 2375492 | 2762101 |
| 238428 | 574086 | 960912 | 1311582 | 1675632 | 2030628 | 2377824 | 2763357 |
| 238461 | 574297 | 962985 | 1311945 | 1676116 | 2031059 | 2377825 | 2763572 |
| 238707 | 575041 | 963671 | 1312031 | 1677422 | 2031161 | 2377826 | 2763602 |
| 238863 | 575440 | 963672 | 1312421 | 1678024 | 2031172 | 2378031 | 2764979 |
| 240735 | 576086 | 963919 | 1313950 | 1678045 | 2031384 | 2378124 | 2765719 |
| 240891 | 576401 | 963985 | 1314547 | 1678366 | 2032252 | 2378736 | 2765822 |
| 240963 | 576583 | 965285 | 1314908 | 1678498 | 2032864 | 2378905 | 2766257 |
| 241120 | 577322 | 965312 | 1315211 | 1679145 | 2032915 | 2378917 | 2766620 |
| 241121 | 577469 | 965432 | 1315295 | 1679175 | 2034553 | 2379070 | 2767487 |
| 241410 | 578858 | 965561 | 1315706 | 1679688 | 2034568 | 2379073 | 2767919 |
| 241575 | 579257 | 965741 | 1316353 | 1679719 | 2034607 | 2379999 | 2768341 |
| 241914 | 579293 | 965744 | 1316425 | 1679720 | 2034626 | 2380271 | 2768512 |
| 242160 | 580078 | 966394 | 1316755 | 1679928 | 2034627 | 2380272 | 2768893 |
| 242553 | 580079 | 967394 | 1316872 | 1680152 | 2034661 | 2380288 | 2769094 |
| 242781 | 580257 | 967873 | 1316971 | 1680170 | 2034670 | 2381369 | 2769545 |
| 244067 | 581241 | 968557 | 1317064 | 1680389 | 2036488 | 2382200 | 2769546 |
| 244068 | 582003 | 968685 | 1318047 | 1681365 | 2036785 | 2382434 | 2769919 |
| 244201 | 582549 | 968688 | 1318242 | 1681725 | 2037229 | 2383013 | 2770475 |
| 244306 | 582678 | 970040 | 1319980 | 1681911 | 2037544 | 2383498 | 2770553 |
| 245604 | 582741 | 971139 | 1320767 | 1682183 | 2038962 | 2384540 | 2770745 |
| 246058 | 582822 | 971358 | 1321259 | 1682393 | 2039106 | 2384541 | 2771084 |
| 246930 | 583368 | 971433 | 1321658 | 1683098 | 2039226 | 2385885 | 2772894 |
| 247030 | 583558 | 972055 | 1322741 | 1683176 | 2040228 | 2385981 | 2773627 |
| 247870 | 584249 | 973269 | 1324314 | 1685708 | 2041705 | 2386143 | 2773628 |
| 248098 | 585093 | 974036 | 1324704 | 1686071 | 2042041 | 2386425 | 2773662 |
| 248892 | 585111 | 975347 | 1324944 | 1686098 | 2042248 | 2387532 | 2773665 |
| 249522 | 585291 | 975371 | 1325391 | 1686224 | 2042392 | 2387832 | 2774498 |
| 249991 | 585307 | 977016 | 1327429 | 1686686 | 2042536 | 2388660 | 2774519 |
| 249992 | 585312 | 977049 | 1327512 | 1686884 | 2043042 | 2388661 | 2774690 |
| 250747 | 586287 | 977277 | 1328554 | 1688154 | 2044434 | 2388881 | 2774714 |

|        |        |        |         |         |         |         |         |
|--------|--------|--------|---------|---------|---------|---------|---------|
| 251680 | 586443 | 978029 | 1329874 | 1688717 | 2044833 | 2389067 | 2775005 |
| 252118 | 588117 | 978089 | 1330693 | 1689035 | 2045298 | 2389307 | 2775310 |
| 252535 | 589093 | 979342 | 1330819 | 1689221 | 2045757 | 2389355 | 2776791 |
| 252835 | 589138 | 979487 | 1331173 | 1689677 | 2046966 | 2390277 | 2776851 |
| 253030 | 589198 | 979488 | 1331505 | 1689959 | 2047323 | 2390374 | 2777562 |
| 253497 | 589456 | 979744 | 1331508 | 1690181 | 2048207 | 2390375 | 2778315 |
| 253704 | 590971 | 979945 | 1331724 | 1690580 | 2049378 | 2390502 | 2778974 |
| 253707 | 591669 | 980650 | 1333300 | 1690748 | 2049379 | 2390586 | 2778977 |
| 255080 | 591670 | 980726 | 1333342 | 1691483 | 2049537 | 2391661 | 2779121 |
| 255672 | 591698 | 980727 | 1333450 | 1691579 | 2049538 | 2392060 | 2779662 |
| 255777 | 591843 | 981606 | 1333477 | 1692041 | 2049971 | 2393279 | 2782978 |
| 255876 | 592028 | 982265 | 1333687 | 1692735 | 2050346 | 2393517 | 2783684 |
| 255999 | 592031 | 982682 | 1333830 | 1692738 | 2050493 | 2393526 | 2784448 |
| 256715 | 592221 | 983709 | 1333936 | 1693043 | 2050700 | 2393885 | 2784499 |
| 256850 | 592222 | 983715 | 1333969 | 1693158 | 2051705 | 2394221 | 2784757 |
| 257018 | 593048 | 984025 | 1333972 | 1693498 | 2051747 | 2394458 | 2785503 |
| 257031 | 593450 | 984138 | 1333990 | 1694182 | 2052131 | 2394785 | 2785504 |
| 257032 | 593456 | 984357 | 1334173 | 1694233 | 2052155 | 2395512 | 2786322 |
| 257855 | 593645 | 985426 | 1334236 | 1694524 | 2052635 | 2395706 | 2786323 |
| 258344 | 593750 | 985441 | 1334392 | 1694878 | 2053274 | 2395992 | 2786595 |
| 258407 | 593819 | 985498 | 1334443 | 1695121 | 2054144 | 2395993 | 2786596 |
| 258538 | 593828 | 985570 | 1334539 | 1695580 | 2054468 | 2396418 | 2787053 |
| 258553 | 594164 | 986083 | 1335041 | 1695730 | 2054717 | 2397386 | 2788108 |
| 259108 | 594809 | 986686 | 1335671 | 1696340 | 2054981 | 2397797 | 2788618 |
| 259124 | 595881 | 988201 | 1338333 | 1696964 | 2055322 | 2397800 | 2788933 |
| 259241 | 596352 | 988228 | 1338336 | 1697261 | 2055325 | 2397950 | 2789310 |
| 259517 | 597219 | 988394 | 1338366 | 1697408 | 2055358 | 2398097 | 2789719 |
| 260697 | 597255 | 988395 | 1338570 | 1697822 | 2056375 | 2399396 | 2790305 |
| 260976 | 597543 | 989084 | 1339248 | 1698032 | 2056635 | 2399921 | 2790317 |
| 261425 | 599370 | 989487 | 1339320 | 1698059 | 2057557 | 2399954 | 2791233 |
| 261486 | 599371 | 989488 | 1339365 | 1698785 | 2058760 | 2400516 | 2791234 |
| 261487 | 599875 | 989571 | 1339774 | 1699096 | 2059336 | 2400558 | 2791538 |
| 261572 | 600208 | 989572 | 1339788 | 1699653 | 2059456 | 2401095 | 2791664 |
| 261611 | 600807 | 991333 | 1340257 | 1700200 | 2059459 | 2403650 | 2792393 |
| 262499 | 602397 | 991957 | 1340374 | 1700201 | 2060493 | 2403830 | 2794123 |
| 262607 | 602535 | 992005 | 1341037 | 1700489 | 2060523 | 2404001 | 2794426 |
| 262850 | 602862 | 992032 | 1341175 | 1701181 | 2060529 | 2404058 | 2795119 |
| 262919 | 603147 | 994409 | 1342108 | 1702060 | 2060571 | 2404083 | 2795137 |
| 262991 | 603204 | 995518 | 1342839 | 1702357 | 2060583 | 2404333 | 2795479 |
| 264007 | 603537 | 995555 | 1342999 | 1702447 | 2060722 | 2405688 | 2795711 |
| 264567 | 605358 | 995560 | 1343000 | 1703014 | 2060878 | 2406816 | 2795726 |
| 265524 | 605385 | 995995 | 1343403 | 1704053 | 2061730 | 2407749 | 2795864 |
| 265687 | 605589 | 997394 | 1343701 | 1704761 | 2061850 | 2408450 | 2796032 |

|        |        |         |         |         |         |         |         |
|--------|--------|---------|---------|---------|---------|---------|---------|
| 265688 | 606363 | 997457  | 1343702 | 1704788 | 2061853 | 2408858 | 2796162 |
| 266097 | 606558 | 997637  | 1344060 | 1705238 | 2061952 | 2409225 | 2796163 |
| 266527 | 606576 | 1002225 | 1344666 | 1705670 | 2062153 | 2409276 | 2797103 |
| 266528 | 606633 | 1002563 | 1348206 | 1705796 | 2064234 | 2409338 | 2797802 |
| 266559 | 606969 | 1002914 | 1348870 | 1705799 | 2064312 | 2410386 | 2798939 |
| 266655 | 607302 | 1004934 | 1348905 | 1707087 | 2064867 | 2410500 | 2799116 |
| 267399 | 607632 | 1005189 | 1348906 | 1707309 | 2064876 | 2410530 | 2799515 |
| 267856 | 607965 | 1007025 | 1349207 | 1707342 | 2064898 | 2410724 | 2799782 |
| 268108 | 610083 | 1007450 | 1350544 | 1707567 | 2064899 | 2411795 | 2799800 |
| 268318 | 610488 | 1007981 | 1350579 | 1707600 | 2065051 | 2411861 | 2800265 |
| 268558 | 610632 | 1008976 | 1350580 | 1708452 | 2065258 | 2413032 | 2800694 |
| 268612 | 610686 | 1009061 | 1352705 | 1708746 | 2065735 | 2413170 | 2800724 |
| 268776 | 611427 | 1009062 | 1352891 | 1709272 | 2066154 | 2413232 | 2800883 |
| 269187 | 611757 | 1009742 | 1353287 | 1710154 | 2066418 | 2414735 | 2801541 |
| 270495 | 613285 | 1009863 | 1353311 | 1710514 | 2066524 | 2414888 | 2801542 |
| 270607 | 613885 | 1010928 | 1354637 | 1711851 | 2066742 | 2416888 | 2802525 |
| 270608 | 614131 | 1011194 | 1354757 | 1711941 | 2066904 | 2417258 | 2803405 |
| 271884 | 614176 | 1011195 | 1354859 | 1712127 | 2067294 | 2418155 | 2805015 |
| 271885 | 614526 | 1012084 | 1354891 | 1713398 | 2067424 | 2419911 | 2805207 |
| 273870 | 614529 | 1012333 | 1356287 | 1713824 | 2067425 | 2420133 | 2805675 |
| 274362 | 614811 | 1013231 | 1356356 | 1714403 | 2067438 | 2421653 | 2805678 |
| 274437 | 615291 | 1013279 | 1356834 | 1714799 | 2068267 | 2421923 | 2806329 |
| 274594 | 616898 | 1013363 | 1357704 | 1715546 | 2068268 | 2422184 | 2806422 |
| 274983 | 617633 | 1013727 | 1358297 | 1716270 | 2068830 | 2422212 | 2806518 |
| 275954 | 618024 | 1013922 | 1358324 | 1717128 | 2069643 | 2423412 | 2806894 |
| 276173 | 618495 | 1014039 | 1358702 | 1717584 | 2069757 | 2425661 | 2807338 |
| 276457 | 618801 | 1014201 | 1359378 | 1718291 | 2069962 | 2428191 | 2807428 |
| 276496 | 618948 | 1014621 | 1359465 | 1718537 | 2070721 | 2428248 | 2807527 |
| 276673 | 619462 | 1015246 | 1359819 | 1718937 | 2071149 | 2428389 | 2807563 |
| 277114 | 620060 | 1015399 | 1361221 | 1722219 | 2071150 | 2429521 | 2807665 |
| 277489 | 620072 | 1015888 | 1361562 | 1722357 | 2072058 | 2429569 | 2808043 |
| 278143 | 620778 | 1015927 | 1363891 | 1722436 | 2072061 | 2430313 | 2808428 |
| 278197 | 621024 | 1016564 | 1364047 | 1722437 | 2072133 | 2430646 | 2808863 |
| 278635 | 621027 | 1016565 | 1364191 | 1722489 | 2072229 | 2430694 | 2809232 |
| 279058 | 622035 | 1016617 | 1365015 | 1722525 | 2073466 | 2431032 | 2809364 |
| 280789 | 622083 | 1016686 | 1365288 | 1723029 | 2075865 | 2431060 | 2810125 |
| 280897 | 622254 | 1016746 | 1365567 | 1723727 | 2075931 | 2431291 | 2810290 |
| 281626 | 622879 | 1016782 | 1366069 | 1723796 | 2076003 | 2431469 | 2810560 |
| 282943 | 622880 | 1016920 | 1367134 | 1724030 | 2079114 | 2432026 | 2810716 |
| 283984 | 623068 | 1018215 | 1367332 | 1724034 | 2079180 | 2432458 | 2811331 |
| 284134 | 623069 | 1019385 | 1368587 | 1724400 | 2079529 | 2433170 | 2811341 |
| 284362 | 623071 | 1019452 | 1368608 | 1724721 | 2079826 | 2433434 | 2811342 |
| 284917 | 623509 | 1019453 | 1369208 | 1726815 | 2080093 | 2433437 | 2811712 |

|        |        |         |         |         |         |         |         |
|--------|--------|---------|---------|---------|---------|---------|---------|
| 285442 | 623907 | 1019749 | 1369395 | 1726986 | 2080467 | 2433958 | 2812427 |
| 286104 | 624354 | 1019750 | 1369491 | 1727598 | 2080800 | 2436406 | 2813036 |
| 286278 | 624675 | 1020003 | 1369492 | 1727697 | 2081584 | 2437687 | 2813135 |
| 286380 | 624702 | 1020414 | 1369667 | 1727961 | 2082321 | 2438668 | 2813352 |
| 286521 | 625315 | 1020725 | 1369991 | 1730311 | 2082322 | 2439732 | 2813478 |
| 287737 | 625474 | 1021363 | 1370141 | 1730569 | 2082560 | 2439733 | 2813490 |
| 288547 | 625990 | 1021516 | 1370768 | 1730764 | 2082949 | 2440082 | 2813835 |
| 288607 | 626447 | 1021663 | 1371008 | 1731054 | 2084902 | 2440229 | 2813854 |
| 288610 | 626468 | 1021975 | 1371053 | 1731340 | 2085052 | 2440494 | 2813855 |
| 288652 | 626593 | 1022612 | 1373363 | 1731837 | 2088231 | 2440574 | 2814018 |
| 288700 | 627119 | 1022613 | 1374188 | 1731870 | 2088232 | 2440817 | 2814318 |
| 288703 | 627122 | 1023151 | 1374428 | 1732422 | 2089567 | 2441406 | 2814447 |
| 288796 | 627856 | 1023595 | 1375199 | 1732425 | 2090723 | 2442334 | 2815033 |
| 289000 | 627859 | 1023708 | 1375589 | 1732647 | 2091444 | 2442704 | 2815300 |
| 289081 | 627961 | 1024477 | 1376221 | 1732866 | 2091648 | 2442963 | 2816101 |
| 289249 | 628039 | 1025223 | 1376636 | 1733163 | 2091662 | 2443521 | 2816185 |
| 290556 | 628390 | 1025506 | 1376776 | 1733328 | 2092807 | 2444594 | 2816192 |
| 291503 | 628826 | 1027888 | 1377722 | 1734252 | 2093069 | 2444938 | 2816390 |
| 291688 | 628967 | 1027963 | 1379433 | 1734306 | 2093070 | 2445599 | 2817626 |
| 292269 | 628974 | 1028023 | 1380474 | 1734948 | 2093131 | 2445753 | 2821151 |
| 294617 | 628975 | 1028479 | 1380576 | 1736424 | 2093176 | 2445758 | 2822588 |
| 294712 | 630095 | 1029793 | 1381521 | 1737276 | 2093218 | 2447230 | 2822894 |
| 300276 | 630827 | 1029873 | 1381797 | 1737300 | 2093520 | 2447434 | 2823536 |
| 302415 | 631154 | 1030575 | 1381800 | 1737984 | 2093673 | 2448053 | 2824031 |
| 302866 | 632515 | 1030576 | 1382460 | 1738197 | 2094496 | 2450530 | 2824082 |
| 302867 | 632989 | 1031262 | 1382931 | 1738707 | 2094844 | 2450596 | 2825430 |
| 303114 | 633798 | 1031263 | 1383060 | 1738716 | 2095483 | 2450623 | 2825485 |
| 303204 | 634438 | 1031315 | 1383408 | 1738833 | 2096063 | 2451016 | 2825486 |
| 303941 | 635783 | 1031672 | 1383546 | 1738869 | 2096178 | 2451100 | 2825556 |
| 303962 | 636116 | 1031884 | 1383564 | 1738962 | 2096304 | 2451322 | 2827352 |
| 304183 | 636393 | 1032221 | 1383711 | 1739493 | 2096827 | 2451666 | 2828066 |
| 304191 | 637488 | 1032271 | 1384723 | 1739496 | 2096890 | 2451819 | 2828084 |
| 304409 | 637797 | 1032769 | 1384724 | 1739942 | 2097397 | 2451825 | 2828087 |
| 304578 | 638347 | 1032820 | 1385524 | 1740098 | 2097646 | 2452236 | 2828536 |
| 304579 | 638527 | 1033082 | 1385525 | 1740335 | 2097697 | 2452386 | 2829667 |
| 304655 | 638977 | 1033083 | 1386081 | 1740668 | 2097796 | 2453433 | 2829745 |
| 305554 | 639199 | 1034213 | 1386189 | 1741031 | 2097910 | 2453505 | 2832126 |
| 305701 | 639445 | 1035399 | 1387320 | 1741460 | 2097934 | 2454179 | 2833124 |
| 305734 | 639535 | 1036572 | 1387587 | 1741751 | 2097991 | 2454212 | 2833334 |
| 306160 | 639604 | 1036618 | 1387932 | 1741778 | 2098875 | 2454482 | 2833553 |
| 306361 | 640042 | 1036639 | 1388844 | 1742695 | 2099348 | 2454570 | 2834245 |
| 307879 | 640332 | 1037290 | 1389702 | 1743070 | 2099349 | 2454571 | 2834620 |
| 308311 | 640557 | 1038241 | 1390409 | 1743724 | 2099704 | 2454821 | 2834621 |



|        |        |         |         |         |         |         |         |
|--------|--------|---------|---------|---------|---------|---------|---------|
| 308380 | 640560 | 1038287 | 1391041 | 1744414 | 2099863 | 2455061 | 2835489 |
| 308605 | 641340 | 1038432 | 1391114 | 1745288 | 2100754 | 2455379 | 2836705 |
| 309316 | 641841 | 1038465 | 1391115 | 1745645 | 2100830 | 2455461 | 2836706 |
| 309464 | 642202 | 1038925 | 1391733 | 1745648 | 2100831 | 2455462 | 2837184 |
| 309710 | 643028 | 1039520 | 1392587 | 1746052 | 2101824 | 2455953 | 2837322 |
| 310001 | 643151 | 1039652 | 1393175 | 1746320 | 2102037 | 2456160 | 2837418 |
| 310004 | 643397 | 1039766 | 1393811 | 1746321 | 2102286 | 2456595 | 2837616 |
| 310118 | 643508 | 1039922 | 1393853 | 1746412 | 2102292 | 2456790 | 2837730 |
| 312058 | 643535 | 1039982 | 1393883 | 1746550 | 2103888 | 2458488 | 2838096 |
| 312583 | 643551 | 1040045 | 1394030 | 1747216 | 2103954 | 2458614 | 2838156 |
| 313474 | 643552 | 1040138 | 1394129 | 1747219 | 2104042 | 2461155 | 2838159 |
| 313999 | 643568 | 1040594 | 1394368 | 1747411 | 2104043 | 2461593 | 2838198 |
| 314298 | 644225 | 1040765 | 1394429 | 1747417 | 2104086 | 2462512 | 2839716 |
| 314301 | 644397 | 1041209 | 1394430 | 1748154 | 2104097 | 2462526 | 2839728 |
| 314577 | 644398 | 1041467 | 1397126 | 1748430 | 2105112 | 2462655 | 2840184 |
| 314646 | 646165 | 1041491 | 1397127 | 1748547 | 2105253 | 2462658 | 2840271 |
| 314847 | 648967 | 1041562 | 1397329 | 1748677 | 2105517 | 2462760 | 2840444 |
| 314898 | 650802 | 1041592 | 1397530 | 1748678 | 2105715 | 2463105 | 2840615 |
| 315072 | 651633 | 1041634 | 1397617 | 1749424 | 2105853 | 2463563 | 2840618 |
| 315801 | 652048 | 1041694 | 1398151 | 1749580 | 2106403 | 2463629 | 2840753 |
| 315876 | 653126 | 1041859 | 1398827 | 1749967 | 2106824 | 2463642 | 2840825 |
| 317605 | 653249 | 1041976 | 1400887 | 1750278 | 2107318 | 2464341 | 2841032 |
| 318379 | 653306 | 1042144 | 1403290 | 1751437 | 2108531 | 2464377 | 2841121 |
| 318980 | 653411 | 1042477 | 1403332 | 1751506 | 2108663 | 2464764 | 2841821 |
| 319169 | 653546 | 1043802 | 1404415 | 1751848 | 2109325 | 2464854 | 2841833 |
| 319322 | 654569 | 1043803 | 1404632 | 1752640 | 2109905 | 2465257 | 2841893 |
| 319430 | 654590 | 1044373 | 1404633 | 1752736 | 2110334 | 2465440 | 2842021 |
| 319532 | 655244 | 1045398 | 1405626 | 1752883 | 2110454 | 2465734 | 2843078 |
| 320066 | 655622 | 1045422 | 1406806 | 1753707 | 2110918 | 2466930 | 2843768 |
| 320225 | 655868 | 1045720 | 1406807 | 1754346 | 2111252 | 2467846 | 2844683 |
| 320721 | 656255 | 1045721 | 1407087 | 1755681 | 2111253 | 2467847 | 2844782 |
| 320722 | 656495 | 1045794 | 1407279 | 1755756 | 2112945 | 2468026 | 2844902 |
| 320748 | 657098 | 1045818 | 1407369 | 1756281 | 2112946 | 2468027 | 2845103 |
| 320749 | 657294 | 1045938 | 1409169 | 1756440 | 2113067 | 2469544 | 2845224 |
| 321106 | 657295 | 1045986 | 1410485 | 1756698 | 2113103 | 2469572 | 2845617 |
| 321643 | 657920 | 1046160 | 1411184 | 1757904 | 2113331 | 2469573 | 2845880 |
| 321928 | 658083 | 1046265 | 1411583 | 1758607 | 2114821 | 2469604 | 2846063 |
| 321965 | 658084 | 1046298 | 1411990 | 1759027 | 2114824 | 2469721 | 2846066 |
| 321966 | 658319 | 1046367 | 1412565 | 1759159 | 2115249 | 2470249 | 2846513 |
| 322668 | 659217 | 1046826 | 1413400 | 1759903 | 2116052 | 2472080 | 2847168 |
| 323380 | 659472 | 1047785 | 1413934 | 1760659 | 2117053 | 2472268 | 2848236 |
| 323883 | 659768 | 1047806 | 1414120 | 1760719 | 2117373 | 2472484 | 2848512 |
| 323980 | 660623 | 1047875 | 1414579 | 1761122 | 2117874 | 2473166 | 2848747 |

|        |        |         |         |         |         |         |         |
|--------|--------|---------|---------|---------|---------|---------|---------|
| 324052 | 660632 | 1048506 | 1414580 | 1761176 | 2118012 | 2473190 | 2849020 |
| 325312 | 660872 | 1048527 | 1415281 | 1761360 | 2119349 | 2473851 | 2849551 |
| 325348 | 662673 | 1048794 | 1415437 | 1761361 | 2119990 | 2474055 | 2850141 |
| 325615 | 664371 | 1048899 | 1415953 | 1761444 | 2120083 | 2474893 | 2850183 |
| 325631 | 664387 | 1049772 | 1416131 | 1761445 | 2120224 | 2474971 | 2850813 |
| 325632 | 664389 | 1050059 | 1416134 | 1763924 | 2120569 | 2475031 | 2850837 |
| 325798 | 664443 | 1050257 | 1416176 | 1764804 | 2120764 | 2475073 | 2850843 |
| 326038 | 664962 | 1050813 | 1416278 | 1765086 | 2120860 | 2475907 | 2852393 |
| 326400 | 665019 | 1051712 | 1416344 | 1765275 | 2121231 | 2476087 | 2852588 |
| 327027 | 665145 | 1051862 | 1416347 | 1765299 | 2121420 | 2476378 | 2852610 |
| 327043 | 665759 | 1052219 | 1417370 | 1765731 | 2121567 | 2476831 | 2852611 |
| 327044 | 665760 | 1052994 | 1417913 | 1766430 | 2121597 | 2477942 | 2853175 |
| 327601 | 665878 | 1053045 | 1418357 | 1766679 | 2121663 | 2478218 | 2853565 |
| 327725 | 667221 | 1053075 | 1418774 | 1766889 | 2121805 | 2478329 | 2853970 |
| 327726 | 667440 | 1053282 | 1419345 | 1767156 | 2121806 | 2478542 | 2854603 |
| 328184 | 667494 | 1053705 | 1419346 | 1767186 | 2122492 | 2479058 | 2855207 |
| 328676 | 667869 | 1054412 | 1419470 | 1768360 | 2123239 | 2480310 | 2855552 |
| 328727 | 668229 | 1054469 | 1420335 | 1768663 | 2123602 | 2480994 | 2856189 |
| 329322 | 672173 | 1054931 | 1420422 | 1770104 | 2124111 | 2481554 | 2856414 |
| 329323 | 672275 | 1055734 | 1420890 | 1771549 | 2124263 | 2481617 | 2856477 |
| 329680 | 672467 | 1057622 | 1422470 | 1771897 | 2126430 | 2482244 | 2857122 |
| 330124 | 673277 | 1057709 | 1423043 | 1772686 | 2126670 | 2482712 | 2857687 |
| 330579 | 673418 | 1058639 | 1423651 | 1773010 | 2126836 | 2484264 | 2857906 |
| 330639 | 674033 | 1059442 | 1423652 | 1773034 | 2126837 | 2484327 | 2858991 |
| 330978 | 674067 | 1061805 | 1424020 | 1773115 | 2126853 | 2484393 | 2859601 |
| 331107 | 674068 | 1062159 | 1424311 | 1773338 | 2126895 | 2484749 | 2859602 |
| 331116 | 674438 | 1062516 | 1424534 | 1773339 | 2127123 | 2484926 | 2859849 |
| 331554 | 675168 | 1062899 | 1424535 | 1774027 | 2127159 | 2485466 | 2860968 |
| 332012 | 676545 | 1063535 | 1425289 | 1774779 | 2127592 | 2485580 | 2861499 |
| 332033 | 676701 | 1063802 | 1425831 | 1774821 | 2127611 | 2486683 | 2861964 |
| 332156 | 676827 | 1065171 | 1425832 | 1774995 | 2127782 | 2487193 | 2862758 |
| 332279 | 678318 | 1065192 | 1426220 | 1775472 | 2129754 | 2489695 | 2863187 |
| 332571 | 679059 | 1065255 | 1426454 | 1777509 | 2130865 | 2491056 | 2865857 |
| 332572 | 682158 | 1065441 | 1427103 | 1777557 | 2131051 | 2491059 | 2866190 |
| 332830 | 682392 | 1065561 | 1427104 | 1777617 | 2131445 | 2491188 | 2866247 |
| 333181 | 683746 | 1065654 | 1427315 | 1778133 | 2131664 | 2492103 | 2867223 |
| 333283 | 683980 | 1065783 | 1427387 | 1779004 | 2132428 | 2492229 | 2867367 |
| 333299 | 684100 | 1065816 | 1427427 | 1779274 | 2132462 | 2492876 | 2867553 |
| 333300 | 685331 | 1066296 | 1427428 | 1779475 | 2132463 | 2493398 | 2867685 |
| 333444 | 685672 | 1066647 | 1428896 | 1779727 | 2132551 | 2493860 | 2867859 |
| 333635 | 685693 | 1067022 | 1429049 | 1780443 | 2133663 | 2494235 | 2868589 |
| 334311 | 685723 | 1067139 | 1429118 | 1780764 | 2133795 | 2494794 | 2871171 |
| 334377 | 685726 | 1068507 | 1429383 | 1780839 | 2134048 | 2494851 | 2871172 |

|        |        |         |         |         |         |         |         |
|--------|--------|---------|---------|---------|---------|---------|---------|
| 334440 | 686535 | 1068801 | 1429408 | 1781007 | 2136135 | 2494875 | 2871254 |
| 334441 | 686734 | 1069257 | 1429409 | 1781271 | 2136234 | 2495581 | 2871392 |
| 334948 | 686735 | 1069695 | 1429422 | 1783765 | 2137570 | 2495719 | 2871464 |
| 335291 | 688306 | 1069833 | 1430046 | 1784566 | 2137678 | 2495740 | 2872715 |
| 337047 | 688423 | 1070202 | 1430554 | 1784918 | 2138621 | 2495803 | 2872716 |
| 337295 | 689430 | 1070203 | 1430882 | 1785147 | 2139625 | 2496807 | 2873101 |
| 337535 | 689610 | 1070983 | 1430883 | 1785463 | 2139667 | 2496892 | 2873131 |
| 337565 | 690112 | 1071331 | 1431959 | 1786955 | 2143430 | 2497421 | 2874639 |
| 338104 | 690113 | 1071478 | 1432073 | 1787132 | 2143552 | 2497463 | 2874702 |
| 338324 | 690542 | 1072273 | 1432097 | 1787998 | 2144442 | 2498224 | 2874867 |
| 338325 | 690605 | 1072733 | 1432967 | 1789404 | 2144676 | 2498395 | 2875086 |
| 338762 | 691133 | 1072931 | 1433572 | 1789836 | 2145432 | 2498612 | 2875350 |
| 338885 | 691145 | 1074345 | 1433829 | 1789860 | 2145738 | 2498613 | 2875389 |
| 339072 | 691967 | 1074474 | 1435054 | 1789908 | 2145987 | 2498662 | 2875842 |
| 339073 | 692219 | 1074717 | 1436140 | 1790795 | 2146332 | 2500461 | 2876808 |
| 340645 | 692267 | 1075177 | 1437212 | 1790828 | 2147227 | 2500488 | 2877549 |
| 341660 | 693005 | 1075180 | 1437665 | 1791122 | 2147724 | 2500530 | 2878380 |
| 341735 | 693017 | 1075231 | 1438175 | 1791710 | 2147787 | 2500533 |         |
| 341912 | 693700 | 1075864 | 1438508 | 1792248 | 2147841 | 2500569 |         |
| 343423 | 693701 | 1076321 | 1439012 | 1792908 | 2147844 | 2501282 |         |
| 343831 | 694236 | 1076422 | 1439157 | 1793042 | 2147901 | 2502242 |         |
| 345206 | 694617 | 1076431 | 1439319 | 1793650 | 2147907 | 2502603 |         |
| 345788 | 694754 | 1076882 | 1439637 | 1793698 | 2149112 | 2502604 |         |
| 346868 | 694938 | 1077129 | 1439739 | 1794565 | 2149637 | 2502864 |         |

**Table S3. Bacterial strains and plasmids used in this study.**

| Plasmids or strains             | Description                                                                                                                     | Reference  |
|---------------------------------|---------------------------------------------------------------------------------------------------------------------------------|------------|
| <b>Plasmids</b>                 |                                                                                                                                 |            |
| pCasSA                          | <i>S. aureus</i> genome editing vector, Km <sup>r</sup> , Cm <sup>r</sup>                                                       | 1          |
| pUC57-APOBEC1                   | pUC57 derivative containing codon optimized APOBEC1 gene, Km <sup>r</sup>                                                       | This study |
| pnCasSA-BEC                     | <i>S. aureus</i> base editing vector, Km <sup>r</sup> , Cm <sup>r</sup>                                                         | This study |
| pnCasSA-BEC- <i>agrAsp</i>      | pnCasSA-BEC derivative with <i>agrA</i> spacer, Q179 mutation to stop codon                                                     | This study |
| pnCasSA-BEC- <i>esaDsp</i>      | pnCasSA-BEC derivative with <i>esaD</i> spacer, Q35 mutation to stop codon                                                      | This study |
| pnCasSA-BEC- <i>cntAsp</i>      | pnCasSA-BEC derivative with <i>cntA</i> spacer, Q354 mutation to stop codon                                                     | This study |
| pnCasSA-BEC-C2sp                | pnCasSA-BEC derivative with C2 spacer                                                                                           | This study |
| pnCasSA-BEC-C3sp                | pnCasSA-BEC derivative with C3 spacer                                                                                           | This study |
| pnCasSA-BEC-C4sp                | pnCasSA-BEC derivative with C4 spacer                                                                                           | This study |
| pnCasSA-BEC-C5sp                | pnCasSA-BEC derivative with C5 spacer                                                                                           | This study |
| pnCasSA-BEC-C6sp                | pnCasSA-BEC derivative with C6 spacer                                                                                           | This study |
| pnCasSA-BEC-C7sp                | pnCasSA-BEC derivative with C7 spacer                                                                                           | This study |
| pnCasSA-BEC-C8sp                | pnCasSA-BEC derivative with C8 spacer                                                                                           | This study |
| pnCasSA-BEC-C9sp                | pnCasSA-BEC derivative with C9 spacer                                                                                           | This study |
| pnCasSA-BEC-C10sp               | pnCasSA-BEC derivative with C10 spacer                                                                                          | This study |
| pnCasSA-BEC-C11sp               | pnCasSA-BEC derivative with C11 spacer                                                                                          | This study |
| pnCasSA-BEC-C12sp               | pnCasSA-BEC derivative with C12 spacer                                                                                          | This study |
| pnCasSA-BEC-CC-4,5sp            | pnCasSA-BEC derivative with C4, C5 spacer                                                                                       | This study |
| pnCasSA-BEC-CC-5,6sp            | pnCasSA-BEC derivative with C5, C6 spacer                                                                                       | This study |
| pnCasSA-BEC-CC-6,7sp            | pnCasSA-BEC derivative with C6, C7 spacer                                                                                       | This study |
| pnCasSA-BEC-CC-7,8sp            | pnCasSA-BEC derivative with C7, C8 spacer                                                                                       | This study |
| <b>Strains</b>                  |                                                                                                                                 |            |
| <i>E. coli</i>                  |                                                                                                                                 |            |
| DH5 $\alpha$                    | F- $\phi$ 80lacZ $\Delta$ M15 $\Delta$ (lacZYA-argF) U169 endA1 recA1 hsdR17(rk-,mk+) supE44 $\lambda$ -thi-1 gyrA96 relA1 phoA | Lab stock  |
| <i>S. aureus</i>                |                                                                                                                                 |            |
| RN4220                          | Restriction-deficient transformation recipient                                                                                  | Lab stock  |
| RN4220 <i>agrA</i> Q179 to stop | RN4220 <i>agrA</i> Q179 mutation to stop codon                                                                                  | This study |
| RN4220 <i>cntA</i> Q35 to stop  | RN4220 <i>cntA</i> Q35 mutation to stop codon                                                                                   | This study |
| RN4220 <i>esaD</i> Q354 to stop | RN4220 <i>esaD</i> Q354 mutation to stop codon                                                                                  | This study |
| Newman                          | Wild type                                                                                                                       | Lab stock  |
| Newman <i>agrA</i> Q179 to stop | Newman <i>agrA</i> Q179 mutation to stop codon                                                                                  | This study |
| Newman <i>cntA</i> Q35 to stop  | Newman <i>cntA</i> Q35 mutation to stop codon                                                                                   | This study |
| USA300                          | Wild type                                                                                                                       | Lab stock  |
| USA300 <i>agrA</i> Q179 to stop | USA300 <i>agrA</i> Q179 mutation to stop codon                                                                                  | This study |
| USA300 <i>cntA</i> Q35 to stop  | USA300 <i>cntA</i> Q35 mutation to stop codon                                                                                   | This study |
| ST398 (1059)                    | Wild type                                                                                                                       | Lab stock  |
| ST398 <i>agrA</i> Q179 to stop  | ST398 <i>agrA</i> Q179 mutation to stop codon                                                                                   | This study |
| ST398 <i>cntA</i> Q35 to stop   | ST398 <i>cntA</i> Q35 mutation to stop codon                                                                                    | This study |
| ST239 (770)                     | Wild type                                                                                                                       | Lab stock  |

---

|                                |                                               |            |
|--------------------------------|-----------------------------------------------|------------|
| ST239 <i>agrA</i> Q179 to stop | ST239 <i>agrA</i> Q179 mutation to stop codon | This study |
| ST239 <i>cntA</i> Q35 to stop  | ST239 <i>cntA</i> Q35 mutation to stop codon  | This study |

---

**Table S4.** Primers used in this study.

|                                  | Name    | Sequence (5'-3')                                                          | Description                                                                                                                                             |
|----------------------------------|---------|---------------------------------------------------------------------------|---------------------------------------------------------------------------------------------------------------------------------------------------------|
| pnCasSA plasmid construction     | nCasrF  | CATGGATAAGAAATACTCAATAGGCTTAGctATCGGCACAAAT<br>AGCGTCGG                   | amplification of the <i>nCas9</i> gene and <i>S. aureus repF</i> origin from pCasSA plasmid                                                             |
|                                  | nCasrR  | CGATTATGTCTTTTGCAGTC                                                      | amplification of the <i>nCas9</i> gene and <i>S. aureus repF</i> origin from pCasSA plasmid                                                             |
|                                  | nCKCF   | CGCACCAGCGAAACTGGT                                                        | amplification of the chloramphenicol-resistance marker, kanamycin-resistance marker and the origin ColE1 from pCasSA plasmid                            |
|                                  | nCKCR   | CCGACGCTATTGTGCCGATagcTAAGCCTATTGAGTATTCTT<br>ATCCATG                     | amplification of the chloramphenicol-resistance marker, kanamycin-resistance marker and the origin ColE1 from pCasSA plasmid                            |
| pnCasSA-BEC plasmid construction | nCas9F  | GTCGACCGAGACCATTGGTCTC <u>Agataagaataactcaataggctta</u><br>gctatcggc      | amplification of the <i>nCas9</i> gene from pnCasSA plasmid                                                                                             |
|                                  | nCas9R  | cgcagcacgatataaagtactgtacta                                               | amplification of the <i>nCas9</i> gene from pnCasSA plasmid                                                                                             |
|                                  | rCKCF   | gctagtacagtactttatctgtgctg                                                | amplification of <i>S. aureus repF</i> origin, chloramphenicol-resistance marker, the origin ColE1 and kanamycin-resistance marker from pnCasSA plasmid |
|                                  | rCKCR   | AGTATTCTTATCTGAGACCAATGGTCTC <u>Gctgacaacgcaggaa</u><br>agaacatgt         | amplification of <i>S. aureus repF</i> origin, chloramphenicol-resistance marker, the origin ColE1 and kanamycin-resistance marker from pnCasSA plasmid |
|                                  | APOBECF | CACATGTTCTTCTGCGTTGTCGACC <u>GAGACCATTGGTCTC</u><br>Aatgagtagcgaaccggctcc | amplification of the APOBEC1 gene from plasmid pUC57-APOBEC1                                                                                            |
|                                  | APOBECR | GCTAAGCCTATTGAGTATTCTTATCacttccggggtgcgcttc                               | amplification of the APOBEC1 gene from plasmid pUC57- APOBEC1                                                                                           |
|                                  | SgSpF   | TGCTCACATGTTCTTCTGCGTTGTCGACAgagtttgcaaaat<br>acaggggattatataa            | amplification of the sgRNA and the rpsL promoter from plasmid pnCasSA                                                                                   |
|                                  | SgSpR   | CACTGCAACCGGACCGTTTCGCTACTCATGTGATATGCCTC<br>CTCTTCACTT                   | amplification of the sgRNA and the rpsL promoter from plasmid pnCasSA                                                                                   |
| <i>agrA</i> gene Q179 to stop    | BaSpsF  | GAAAaccgtcaaatgaatttta                                                    | <i>agrA</i> spacer for its Q179 mutation to stop codon                                                                                                  |
|                                  | BaSpsR  | AAACTaaaattcaattgacggtt                                                   | <i>agrA</i> spacer for its Q179 mutation to stop codon                                                                                                  |
|                                  | AgrAvF  | ggtgaaggtcgtggttagg                                                       | amplification of the verified <i>agrA</i> DNA from genome                                                                                               |
|                                  | AgrAvR  | gccagctatacagtcatttg                                                      | amplification of the verified <i>agrA</i> DNA from genome                                                                                               |
| <i>cntA</i> gene                 | BcSpsF  | GAAACaagcaattaacgtatcacga                                                 | <i>cntA</i> spacer for its Q35 mutation to stop                                                                                                         |

|                                           |                          |                             |                                                           |
|-------------------------------------------|--------------------------|-----------------------------|-----------------------------------------------------------|
| Q35 to stop                               |                          |                             | codon                                                     |
|                                           | BcSpsR                   | AAACtctgtatcttaattgcttg     | <i>cntA</i> spacer for its Q35 mutation to stop codon     |
|                                           | CntAvF                   | tcaatttagaaagaggaaaagcaa    | amplification of the verified <i>cntA</i> DNA from genome |
|                                           | CntAvR                   | tggaaacatgagcgcaatac        | amplification of the verified <i>cntA</i> DNA from genome |
| <i>esaD</i> gene<br>Q354 to stop          | BeSpsF                   | GAAActgttcaacaaagtagaat     | <i>esaD</i> spacer for its Q354 mutation to stop codon    |
|                                           | BeSpsR                   | AAACatttctactttgtgaacag     | <i>esaD</i> spacer for its Q354 mutation to stop codon    |
|                                           | EsaDvF                   | tgaacattgggtacggaat         | amplification of the verified <i>esaD</i> DNA from genome |
|                                           | EsaDvR                   | caaatgtcatgttgccact         | amplification of the verified <i>esaD</i> DNA from genome |
| targeting Cn<br>at different<br>positions | BHSpw2F                  | GAAAtctgatattaatataaac      | C2 spacer for base editing                                |
|                                           | BHSpw2R                  | AAACgttttaataatataatcaga    | C2 spacer for base editing                                |
|                                           | BHSpw3F                  | GAAAagcaatactacagtaaaaaac   | C3 spacer for base editing                                |
|                                           | BHSpw3R                  | AAACgttttactgtagtattgct     | C3 spacer for base editing                                |
|                                           | BaSpw4F                  | GAAAtgtctacaagttgcagcga     | C4 spacer for base editing                                |
|                                           | BaSpw4R                  | AAACtgcctgcaacttttagaca     | C4 spacer for base editing                                |
|                                           | BHSpw5F                  | GAAAagaacgaaaggtaccattgc    | C5 spacer for base editing                                |
|                                           | BHSpw5R                  | AAACgcaatggtagctttgttct     | C5 spacer for base editing                                |
|                                           | BHSpw6F                  | GAAAggattcaacggtaattgtac    | C6 spacer for base editing                                |
|                                           | BHSpw6R                  | AAACgtaacattaccgttgaatcc    | C6 spacer for base editing                                |
|                                           | BESpw7F                  | GAAAatataatcgaaaccgataa     | C7 spacer for base editing                                |
|                                           | BESpw7R                  | AAACttatgatcggttcgataat     | C7 spacer for base editing                                |
|                                           | BHSpw8F                  | GAAAaatgttactggtgatgatac    | C8 spacer for base editing                                |
|                                           | BHSpw8R                  | AAACgtatcatcaccagtaacatt    | C8 spacer for base editing                                |
|                                           | BESpw9F                  | GAAAaggtataacgaatgtaaat     | C9 spacer for base editing                                |
|                                           | BESpw9R                  | AAACatttaacattcgttatacct    | C9 spacer for base editing                                |
|                                           | BESpw10F                 | GAAAaaaaataactaattaaaaa     | C10 spacer for base editing                               |
|                                           | BESpw10R                 | AAACttttaattagatattttc      | C10 spacer for base editing                               |
|                                           | BHSpw11F                 | GAAAagaagaaggtgtaacaaaag    | C11 spacer for base editing                               |
|                                           | BHSpw11R                 | AAACttttgttagcaccttcttc     | C11 spacer for base editing                               |
| BHSpw12F                                  | GAAAggaaaaattggcggccttat | C12 spacer for base editing |                                                           |
| BHSpw12R                                  | AAACataaggcccaatttttcc   | C12 spacer for base editing |                                                           |
| targeting CC<br>at different<br>positions | BHSpw45F                 | GAAAgtaaccaataactaaagataaa  | The C4, C5 spacer for base editing                        |
|                                           | BHSpw45R                 | AAACttatcttagtattggtac      | The C4, C5 spacer for base editing                        |
|                                           | BHSpw56F                 | GAAAaaaaccggtactacagatat    | The C5, C6 spacer for base editing                        |
|                                           | BHSpw56R                 | AAACatctctgtataccggtttt     | The C5, C6 spacer for base editing                        |
|                                           | BCSpw67F                 | GAAAgcattctatcaatgaaaaa     | The C6, C7 spacer for base editing                        |
|                                           | BCSpw67R                 | AAACttttcattgataggaatgc     | The C6, C7 spacer for base editing                        |

|  |          |                          |                                    |
|--|----------|--------------------------|------------------------------------|
|  | BESpw78F | GAAAgagatacctatggggcttct | The C7, C8 spacer for base editing |
|  | BESpw78R | AAACagaagccccataggtatctc | The C7, C8 spacer for base editing |

## References

1. W. Chen, Y. Zhang, W. S. Yeo, T. Bae and Q. Ji, *J Am Chem Soc*, 2017, **139**, 3790-3795.
